# Supplementary material for: Application of a novel small scale UV LED photochemical batch reactor for the thiol-yne reaction
Source: Royal Society of Chemistry journal article supplement (doi:10.1039/c5ra08787b), 2015-01-01
Supplement: c5ra08787b1.pdf [file c5ra08787b1.pdf]

compound 3a

Current Data Parameters  
NAME 305936  
EXPNO 200  
PROCNO 1

F2 - Acquisition Parameters  
Date\_ 20130824  
Time 13.53  
INSTRUM spect  
PROBHD 3 mm PABBI 1H/  
PULPROG zg30  
TD 65536  
SOLVENT DMSO  
NS 16  
DS 2  
SWH 10330.578 Hz  
FIDRES 0.157632 Hz  
AQ 3.1719923 sec  
RG 287  
DW 48.400 usec  
DE 6.50 usec  
TE 300.0 K  
D1 1.00000000 sec

==== CHANNEL f1 =====  
NUC1 1H  
P1 7.80 usec  
PLW1 5.99790001 W  
SFO1 500.1330885 MHz

F2 - Processing parameters  
SI 131072  
SF 500.1288970 MHz  
WDW EM  
SSB 0  
LB 0.30 Hz  
GB 0  
PC 1.00

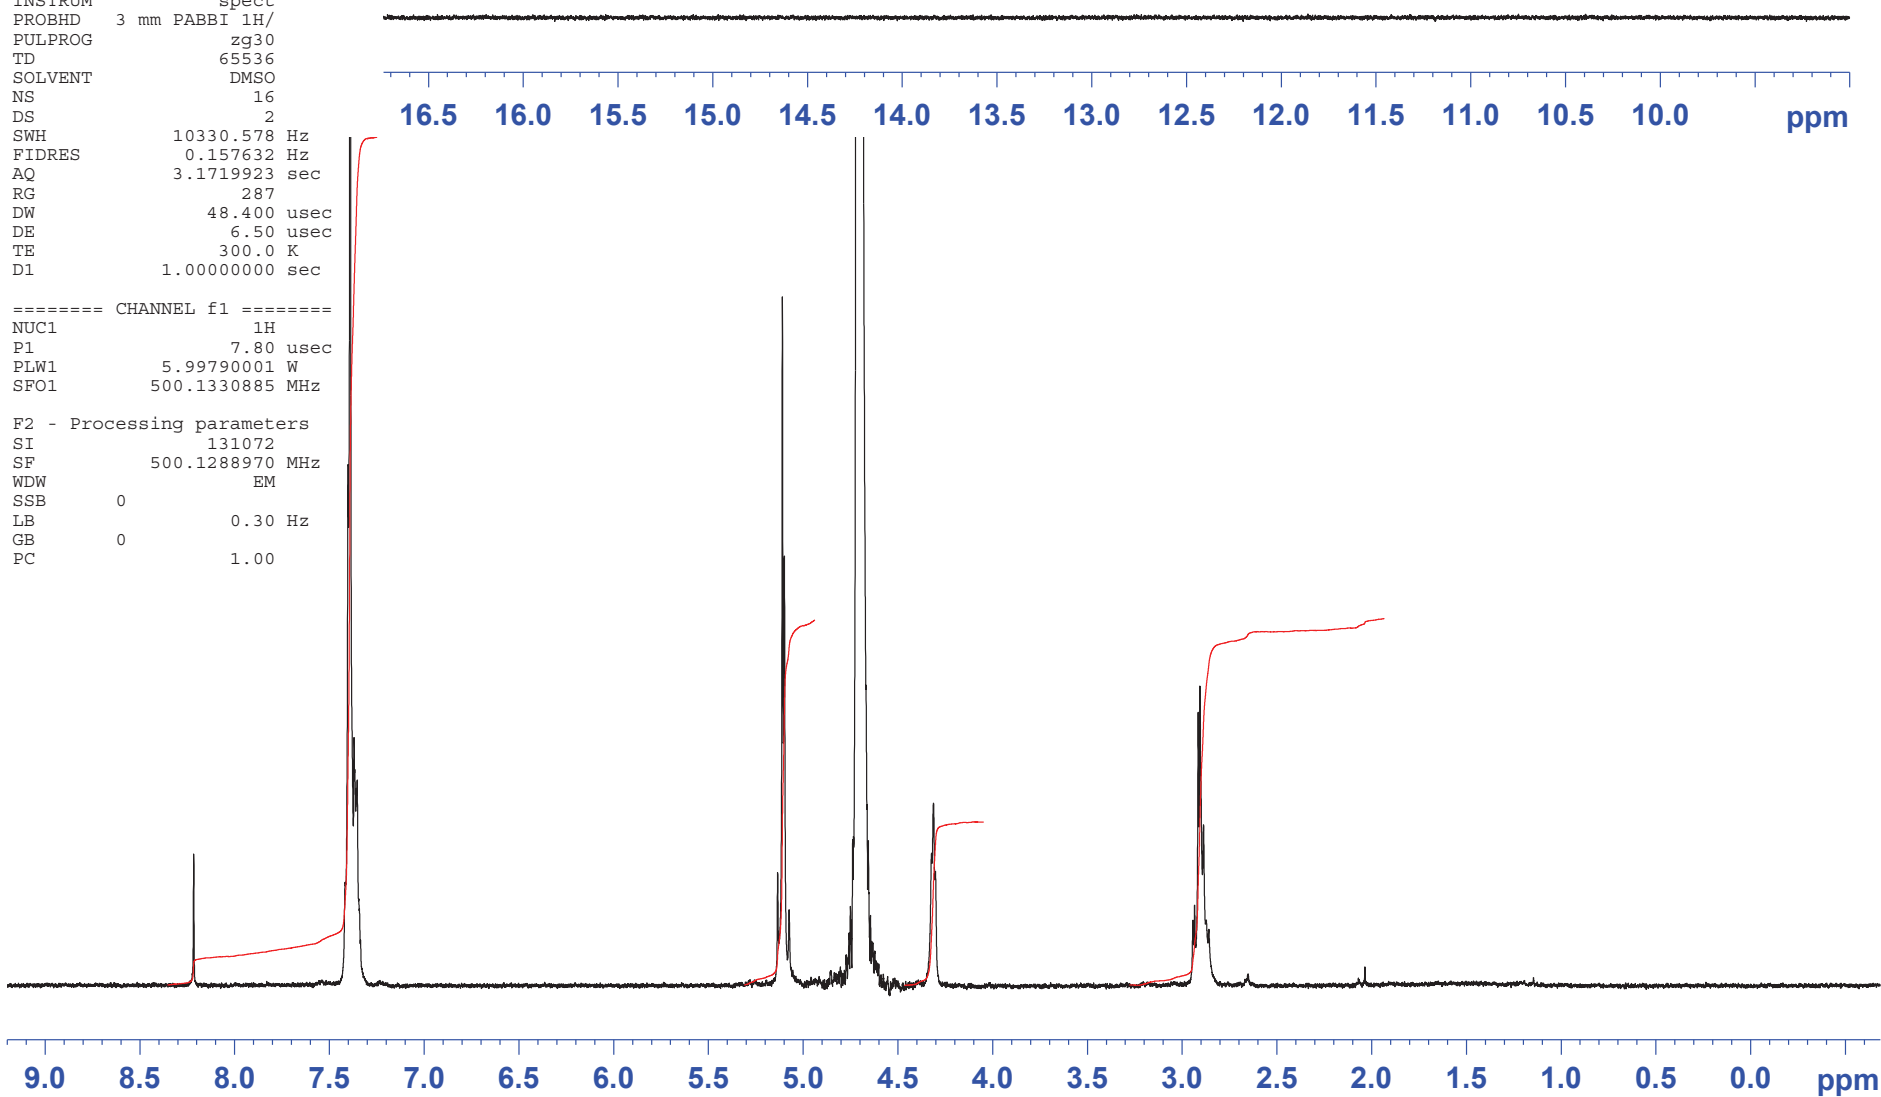

compound 3a

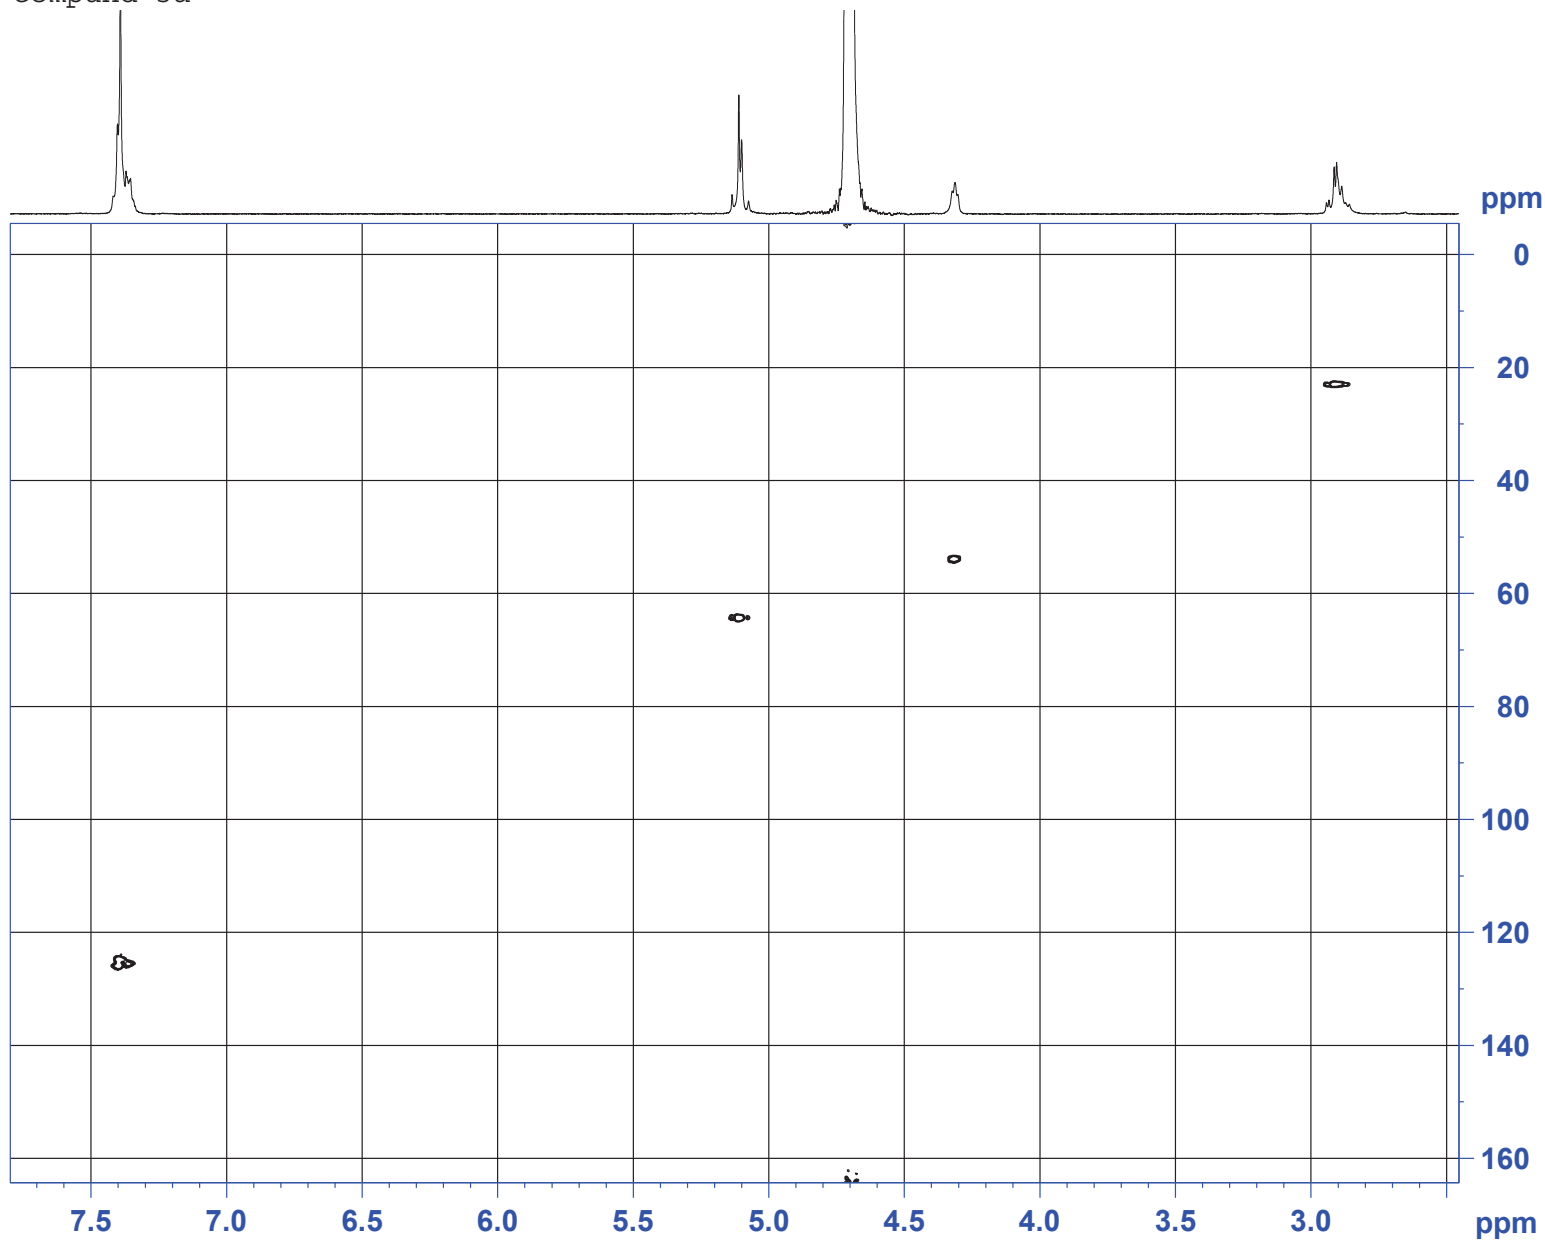

```
Current Data Parameters
NAME          305936
EXPNO         201
PROCNO        1

F2 - Acquisition Parameters
Date_         20130824
Time_         13.55
INSTRUM       spect
PROBHD        3 mm PABBI 1H/
PULPROG       hsqcqtgpsi
TD            1024
SOLVENT       DMSO
NS            4
DS            16
SWH           2673.797 Hz
FIDRES        2.611130 Hz
AQ            0.1915380 sec
RG            2050
DW            187.000 usec
DE            6.50 usec
TE            300.1 K
CNST2         145.0000000
D0            0.0000300 sec
D1            1.33697903 sec
D4            0.00172414 sec
D11           0.03000000 sec
D13           0.00000400 sec
D16           0.00020000 sec
D24           0.00110000 sec
IN0           0.00002340 sec
ZGPTNS

===== CHANNEL f1 =====
NUC1          1H
P1            7.80 usec
P2            15.60 usec
P28           1000.00 usec
PLW1          5.99790001 W
SFO1          500.1314653 MHz

===== CHANNEL f2 =====
CPDPRG2       garp
NUC2          13C
P3            11.00 usec
P4            22.00 usec
PCPD2         70.00 usec
PLW2          130.00000000 W
PLW12         3.21020007 W
SFO2          125.7678496 MHz

===== GRADIENT CHANNEL =====
GPNAM1        SMSQ10.100
GPNAM2        SMSQ10.100
GPZ1          80.00 %
GPZ2          20.10 %
P16           1000.00 usec

F1 - Acquisition parameters
TD            256
SFO1          125.7678 MHz
FIDRES        83.517296 Hz
SW            169.999 ppm
FnMODE        Echo-Antiecho

F2 - Processing parameters
SI            2048
SF            500.1289021 MHz
WDW           QSINE
SSB           2
LB            0 Hz
GB            0
PC            1.40

F1 - Processing parameters
SI            1024
MC2           echo-antiecho
SF            125.7578713 MHz
WDW           SINE
SSB           2
LB            0 Hz
GB            0
```

compound 3a

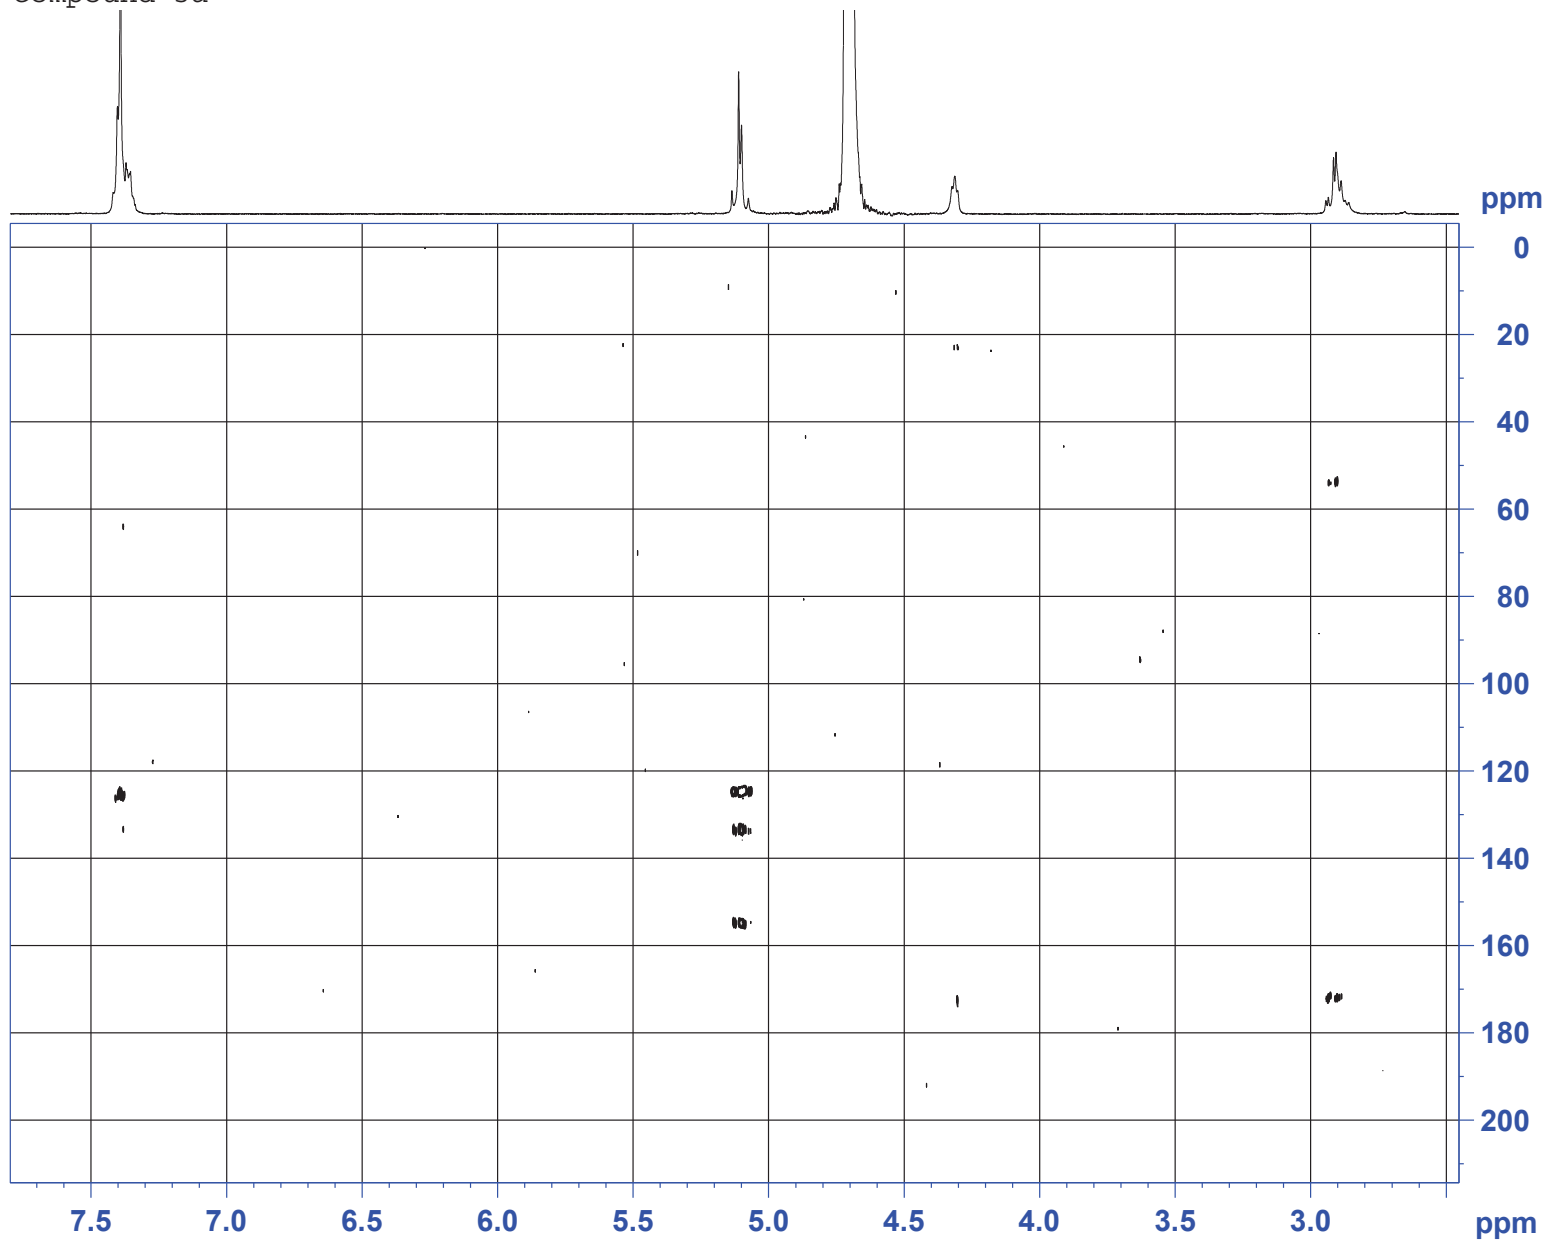

```
Current Data Parameters
NAME          305936
EXPNO         202
PROCNO        1

F2 - Acquisition Parameters
Date_         20130824
Time          14.22
INSTRUM       spect
PROBHD        3 mm PABBI 1H/
PULPROG       hmbcetgpl3nd
TD            2048
SOLVENT       DMSO
DS            16
SWH           2673.797 Hz
FIDRES        1.305565 Hz
AQ            0.3830260 sec
RG            1820
DW            187.000 usec
DE            6.50 usec
TE            299.9 K
CNST6         120.0000000
CNST7         170.0000000
CNST13        8.0000000
CNST30        0.5981131
D0            0.00000300 sec
D1            1.64856303 sec
D6            0.06250000 sec
D16           0.00020000 sec
IN0           0.00001805 sec

===== CHANNEL f1 =====
NUC1           1H
P1             7.80 usec
P2            15.60 usec
PLW1          5.99790001 W
SFO1          500.1314653 MHz

===== CHANNEL f2 =====
NUC2           13C
P3            11.00 usec
P24           2000.00 usec
PLW2          130.00000000 W
SFO2          125.7709936 MHz
SPNAM7        Crp60comp.4
SPOAL7        0 Hz
SPOFFS7       0 Hz
SPW7          24.03400040 W

===== GRADIENT CHANNEL =====
GPNAM1        SMSQ10.100
GPNAM3        SMSQ10.100
GPNAM4        SMSQ10.100
GPNAM5        SMSQ10.100
GPNAM6        SMSQ10.100
GPZ1          80.00 %
GPZ3          14.00 %
GPZ4          -8.00 %
GPZ5          -4.00 %
GPZ6          -2.00 %
P16           1000.00 usec

F1 - Acquisition parameters
TD            256
SFO1          125.771 MHz
FIDRES        108.083908 Hz
SW            219.999 ppm
FbMODE        Echo-Antiecho

F2 - Processing parameters
SI            4096
SF            500.1289021 MHz
WDW           SINE
SSB           0
LB            0 Hz
GB            0
PC            1.40

F1 - Processing parameters
SI            1024
MC2           echo-antiecho
SF            125.7578713 MHz
WDW           GM
SSB           0
LB            0 Hz
GB            0cc
```

compound 3a



```
Current Data Parameters
NAME          305936
EXPNO         202
PROCNO        1

F2 - Acquisition Parameters
Date_         20130824
Time          14.22
INSTRUM       spect
PROBHD        3 mm PABBI 1H/
PULPROG       hmbcetgpl3nd
TD            2048
SOLVENT       DMSO
DS            16
SWH           2673.797 Hz
FIDRES        1.305565 Hz
AQ            0.3830260 sec
RG            1820
DW            187.000 usec
DE            6.50 usec
TE            299.9 K
CNST6         120.0000000
CNST7         170.0000000
CNST13        8.0000000
CNST30        0.5981131
D0            0.00000300 sec
D1            1.64856303 sec
D6            0.06250000 sec
D16           0.00020000 sec
IN0           0.00001805 sec

===== CHANNEL f1 =====
NUC1           1H
P1             7.80 usec
P2            15.60 usec
PLW1          5.99790001 W
SFO1          500.1314653 MHz

===== CHANNEL f2 =====
NUC2           13C
P3            11.00 usec
P24           2000.00 usec
PLW2          130.00000000 W
SFO2          125.7709936 MHz
SPNAM7        Crp60comp.4
SPOAL7        0 Hz
SPOFFS7       0 Hz
SPW7          24.03400040 W

===== GRADIENT CHANNEL =====
GPNAM1        SMSQ10.100
GPNAM3        SMSQ10.100
GPNAM4        SMSQ10.100
GPNAM5        SMSQ10.100
GPNAM6        SMSQ10.100
GPZ1          80.00 %
GPZ3          14.00 %
GPZ4          -8.00 %
GPZ5          -4.00 %
GPZ6          -2.00 %
P16           1000.00 usec

F1 - Acquisition parameters
TD            256
SFO1          125.771 MHz
FIDRES        108.083908 Hz
SW            219.999 ppm
FbMODE        Echo-Antiecho

F2 - Processing parameters
SI            4096
SF            500.1289021 MHz
WDW           SINE
SSB           0
LB            0 Hz
GB            0
PC            1.40

F1 - Processing parameters
SI            1024
MC2           echo-antiecho
SF            125.7578713 MHz
WDW           GM
SSB           0
LB            0 Hz
GB            0cc
```

compound 3a

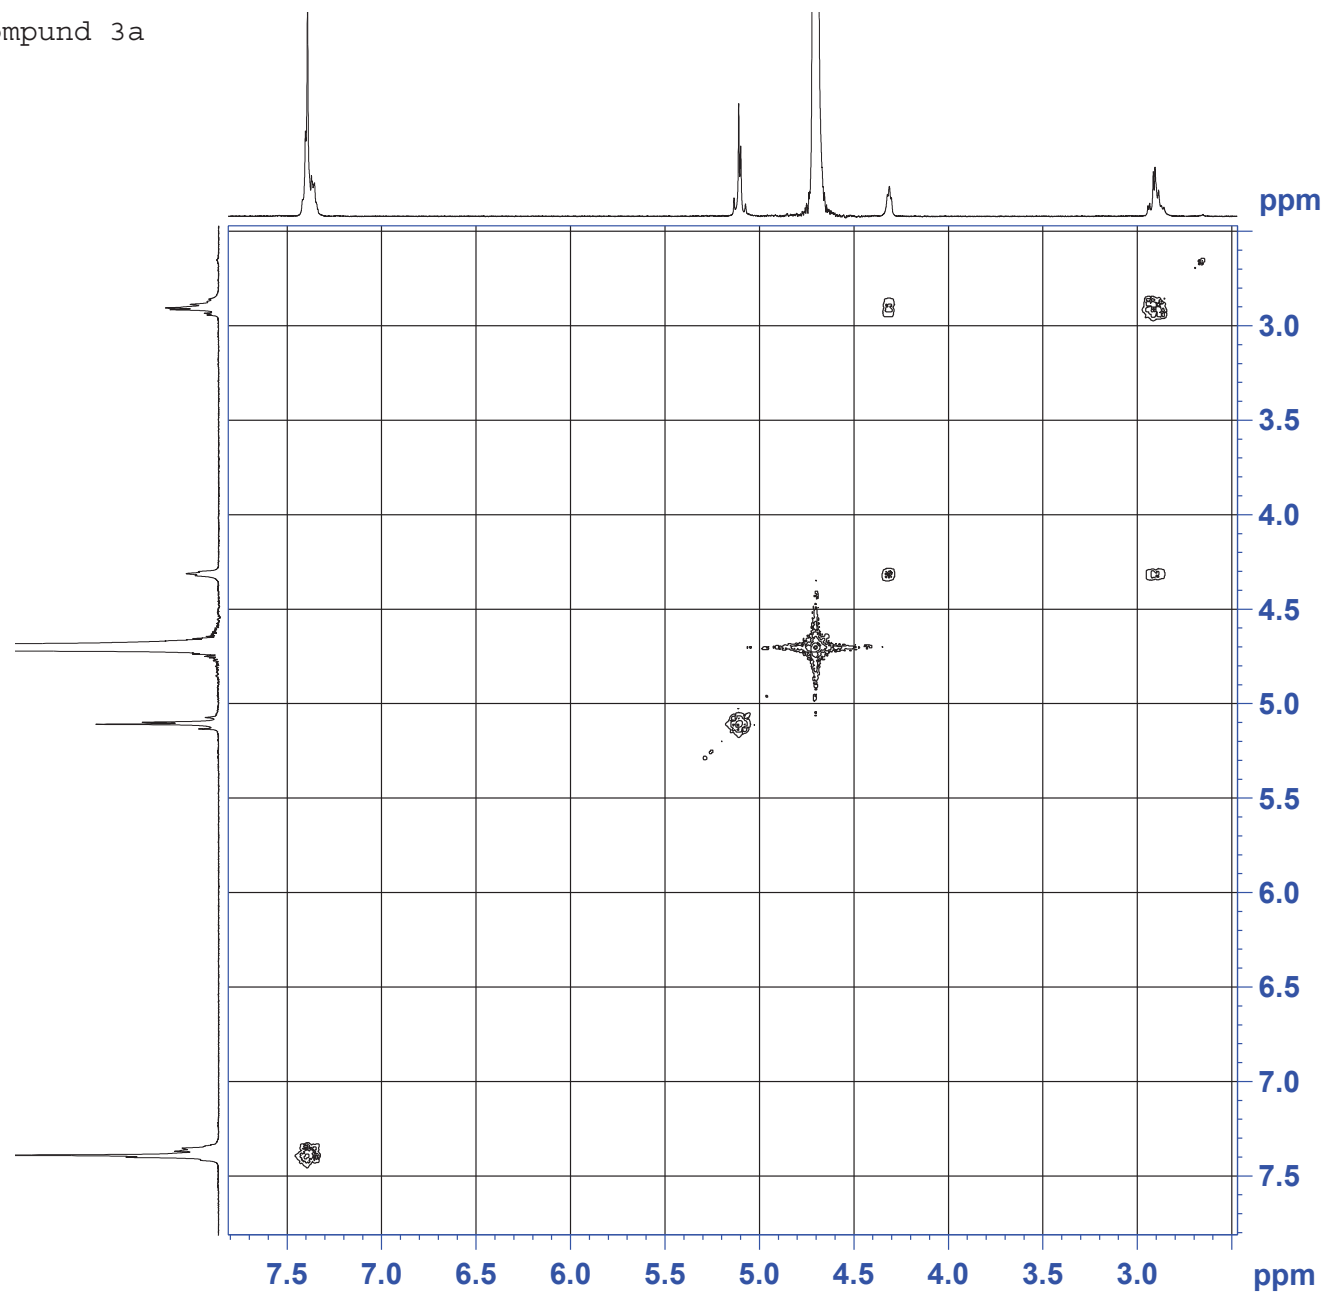

Current Data Parameters  
NAME 305936  
EXPNO 203  
PROCNO 1

F2 - Acquisition Parameters  
Date\_ 20130824  
Time 16.47  
INSTRUM spect  
PROBHD 3 mm PABBI 1H/  
PULPROG cosygpgf  
TD 2048  
SOLVENT DMSO  
NS 4  
DS 8  
SWH 2673.797 Hz  
FIDRES 1.30565 Hz  
AQ 0.3830260 sec  
RG 575  
DW 187.000 usec  
DE 6.50 usec  
TE 300.0 K  
D0 0.0000300 sec  
D1 1.74481905 sec  
D13 0.0000400 sec  
D16 0.00020000 sec  
IN0 0.00037400 sec

==== CHANNEL f1 =====  
NUC1 1H  
P0 7.80 usec  
P1 7.80 usec  
PLW1 5.99790001 W  
SFO1 500.1314653 MHz

==== GRADIENT CHANNEL =====  
GPNAM1 SMSQ10.100  
GPZ1 10.00 %  
P16 1000.00 usec

F1 - Acquisition parameters  
TD 256  
SFO1 500.1315 MHz  
FIDRES 10.444519 Hz  
SW 5.346 ppm  
FnMODE QF

F2 - Processing parameters  
SI 1024  
SF 500.1288954 MHz  
WDW SINE  
SSB 0  
LB 0 Hz  
GB 0  
PC 1.40

F1 - Processing parameters  
SI 1024  
MC2 QF  
SF 500.1288954 MHz  
WDW TRAP  
SSB 0  
LB 0 Hz  
GB 0c

Current Data Parameters  
NAME 50039067  
EXPNO 500  
PROCNO 1

F2 - Acquisition Parameters  
Date\_ 20150217  
Time 14.03  
INSTRUM spect  
PROBHD 5 mm CPDCH 13C  
PULPROG zg30  
TD 65536  
SOLVENT MeOD  
NS 32  
DS 2  
SWH 10330.578 Hz  
FIDRES 0.157632 Hz  
AQ 3.1719425 sec  
RG 18  
DW 48.400 usec  
DE 10.00 usec  
TE 303.0 K  
D1 1.00000000 sec  
TDO 1

==== CHANNEL f1 =====  
SFO1 500.1330885 MHz  
NUC1 1H  
P1 8.90 usec  
PLW1 15.73700047 W

F2 - Processing parameters  
SI 32768  
SF 500.1300117 MHz  
WDW EM  
SSB 0  
LB 0.30 Hz  
GB 0  
PC 1.00

compound 3b

U-C:/Bruker/TopSpin3.2\data\smTrack\smr\_USER-hwup0081\_NAME=50039067\_EXPNO=500\_PROCNO=1  
F1=16.48ppm F2=4.17ppm M1=0.50cm M2=1.0000.00cm PC=1.000

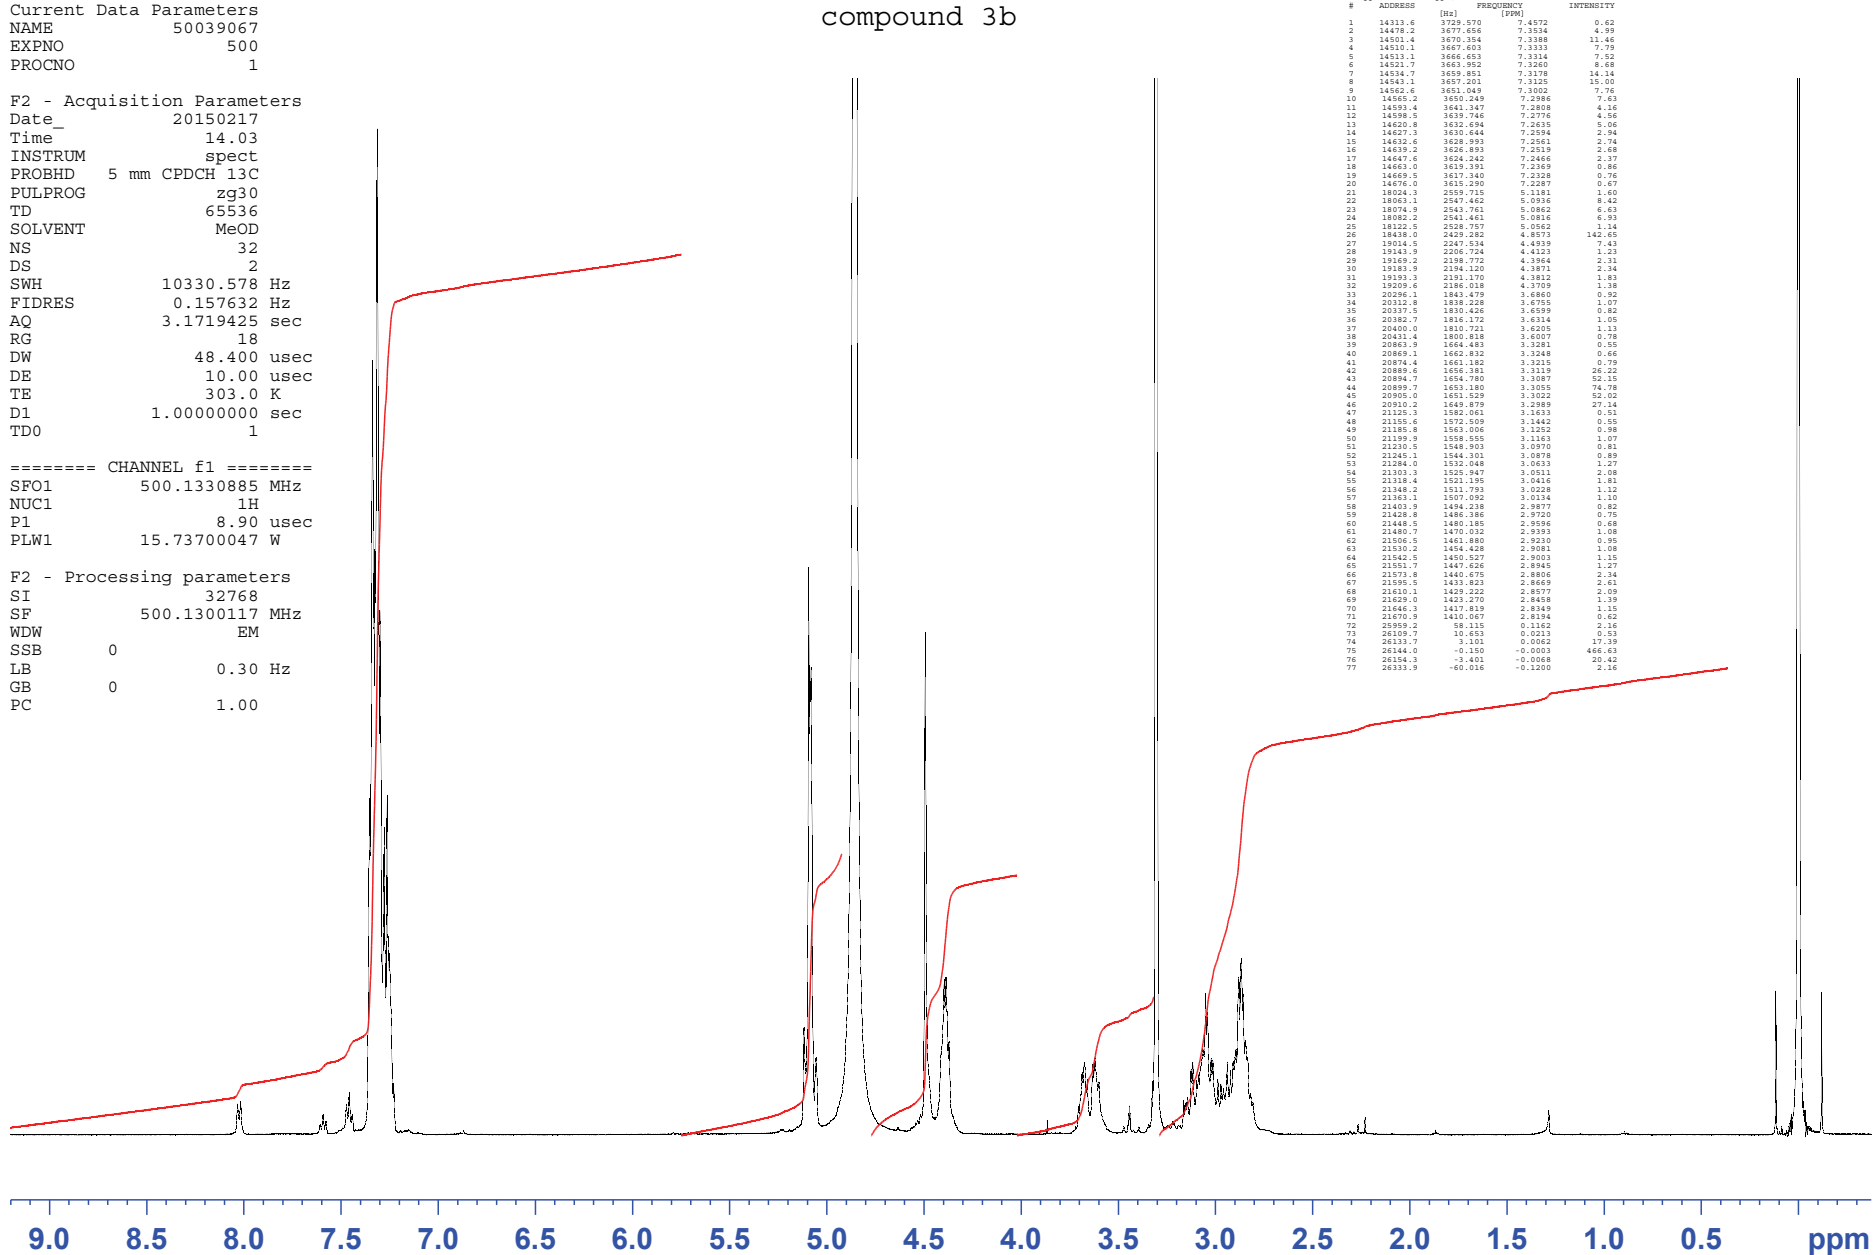

Current Data Parameters  
NAME 50039067  
EXPNO 501  
PROCNO 1

### compound 3b

F2 - Acquisition Parameters  
Date\_ 20150217  
Time 17.05  
INSTRUM spect  
PROBHD 5 mm CPDCH 13C  
PULPROG zgpg  
TD 65536  
SOLVENT MeOD  
NS 2048  
DS 4  
SWH 30864.197 Hz  
FIDRES 0.470950 Hz  
AQ 1.0616832 sec  
RG 724  
DW 16.200 usec  
DE 18.000 usec  
TE 303.0 K  
D1 4.00000000 sec  
D11 0.03000000 sec  
TDO 1

==== CHANNEL f1 =====  
SFO1 125.7703643 MHz  
NUC1 13C  
P1 9.70 usec  
PLW1 34.40000153 W

==== CHANNEL f2 =====  
SFO2 500.1320005 MHz  
NUC2 1H  
CPDPRG2 waltz16  
PCPD2 80.00 usec  
PLW2 15.73700047 W  
PLW12 0.19476999 W  
PLW13 0.12465000 W

F2 - Processing parameters  
SI 65536  
SF 125.7576077 MHz  
WDW EM  
SSB 0  
LB 1.00 Hz  
GB 0  
PC 1.40

DD=C:/Bruker/TopSpin3.2\data\dataTrack\msr\_USER\hwg0081\_MMR-50039067\_EXPNO=501\_PROCNO=1  
F1=224.131800 F2=21.276900 MC=0.00000 WALTZ160000.00000 PC=1.40000

| [Hz] | ADDRESS | PPM       | INTENSITY |
|------|---------|-----------|-----------|
| 1    | 13385.4 | 21884.814 | 174.6241  |
| 2    | 13386.1 | 21879.812 | 171.9840  |
| 3    | 13438.0 | 21860.068 | 173.8270  |
| 4    | 15052.5 | 21395.046 | 167.7437  |
| 5    | 17512.0 | 19932.002 | 158.4984  |
| 6    | 17748.5 | 19811.076 | 157.6849  |
| 7    | 22598.1 | 17546.154 | 139.5236  |
| 8    | 22598.2 | 17546.319 | 139.4931  |
| 9    | 22953.7 | 17378.658 | 138.1917  |
| 10   | 23049.0 | 17333.762 | 137.4947  |
| 11   | 23964.3 | 16902.715 | 134.4071  |
| 12   | 24042.2 | 16897.738 | 131.4868  |
| 13   | 24939.6 | 16443.411 | 130.7548  |
| 14   | 25206.5 | 16308.309 | 129.8895  |
| 15   | 25270.5 | 16287.572 | 129.5156  |
| 16   | 25294.9 | 16276.078 | 129.4042  |
| 17   | 25368.4 | 16241.469 | 129.1490  |
| 18   | 25398.5 | 16227.271 | 129.0361  |
| 19   | 25419.6 | 16217.349 | 128.9572  |
| 20   | 25425.5 | 16214.582 | 128.9325  |
| 21   | 25438.8 | 16208.294 | 128.8852  |
| 22   | 25484.9 | 16186.401 | 128.7127  |
| 23   | 37471.9 | 10541.117 | 83.8225   |
| 24   | 40087.9 | 9328.146  | 74.3765   |
| 25   | 40052.5 | 9325.970  | 74.1883   |
| 26   | 40398.8 | 9152.888  | 72.8615   |
| 27   | 40420.8 | 9152.511  | 72.7790   |
| 28   | 41458.3 | 8569.752  | 68.1450   |
| 29   | 41751.0 | 8524.077  | 67.7977   |
| 30   | 41759.1 | 8522.279  | 67.7875   |
| 31   | 41971.8 | 8422.100  | 66.8709   |
| 32   | 42005.7 | 8406.129  | 66.8439   |
| 33   | 44813.8 | 7083.624  | 56.3276   |
| 34   | 44851.8 | 7083.670  | 55.8111   |
| 35   | 44904.6 | 6998.499  | 55.6507   |
| 36   | 45004.7 | 6939.720  | 55.2127   |
| 37   | 45035.5 | 6929.220  | 55.4974   |
| 38   | 45093.1 | 6845.664  | 49.6843   |
| 39   | 46623.7 | 6231.277  | 49.5499   |
| 40   | 46634.5 | 6226.196  | 49.5095   |
| 41   | 46638.6 | 6224.247  | 49.4940   |
| 42   | 46644.4 | 6221.531  | 49.4724   |
| 43   | 46646.5 | 6220.525  | 49.4644   |
| 44   | 46648.6 | 6219.556  | 49.4567   |
| 45   | 46650.6 | 6218.588  | 49.4490   |
| 46   | 46652.7 | 6217.632  | 49.4414   |
| 47   | 46654.7 | 6216.664  | 49.4337   |
| 48   | 46656.8 | 6215.670  | 49.4258   |
| 49   | 46669.3 | 6209.810  | 49.3792   |
| 50   | 46684.3 | 6202.730  | 49.3229   |
| 51   | 46691.5 | 6199.322  | 49.2958   |
| 52   | 46714.7 | 6188.431  | 49.2092   |
| 53   | 46725.2 | 6183.489  | 49.1699   |
| 54   | 46727.5 | 6182.370  | 49.1610   |
| 55   | 46729.6 | 6181.389  | 49.1532   |
| 56   | 46733.3 | 6179.653  | 49.1394   |
| 57   | 46735.4 | 6178.647  | 49.1334   |
| 58   | 46737.5 | 6177.679  | 49.1277   |
| 59   | 46739.5 | 6176.723  | 49.1161   |
| 60   | 46741.6 | 6175.767  | 49.1085   |
| 61   | 46743.6 | 6174.812  | 49.1009   |
| 62   | 46745.6 | 6173.843  | 49.0932   |
| 63   | 46747.7 | 6172.862  | 49.0854   |
| 64   | 46749.9 | 6171.856  | 49.0774   |
| 65   | 46750.3 | 6166.964  | 49.0385   |
| 66   | 46772.1 | 6161.393  | 48.9942   |
| 67   | 46774.7 | 6160.161  | 48.9844   |
| 68   | 46780.3 | 6157.507  | 48.9633   |
| 69   | 46782.5 | 6156.501  | 48.9553   |
| 70   | 46784.6 | 6155.483  | 48.9472   |
| 71   | 46805.6 | 6145.598  | 48.8686   |
| 72   | 46818.2 | 6139.688  | 48.8216   |
| 73   | 46820.3 | 6138.682  | 48.8136   |
| 74   | 46822.4 | 6137.713  | 48.8059   |
| 75   | 46824.4 | 6136.757  | 48.7983   |
| 76   | 46826.4 | 6135.789  | 48.7908   |
| 77   | 46828.5 | 6134.833  | 48.7830   |
| 78   | 46830.5 | 6133.878  | 48.7754   |
| 79   | 46832.5 | 6132.922  | 48.7678   |
| 80   | 46834.6 | 6131.966  | 48.7602   |
| 81   | 46836.6 | 6130.998  | 48.7525   |
| 82   | 46838.7 | 6130.029  | 48.7448   |
| 83   | 46840.8 | 6129.036  | 48.7369   |
| 84   | 46851.2 | 6124.121  | 48.6979   |
| 85   | 46896.6 | 6102.753  | 48.5279   |
| 86   | 47076.4 | 6038.055  | 47.8644   |
| 87   | 47115.1 | 5999.870  | 47.7098   |
| 88   | 47375.6 | 5971.374  | 47.4832   |
| 89   | 47445.1 | 5844.446  | 46.4739   |
| 90   | 47465.8 | 5834.675  | 46.3962   |
| 91   | 50135.1 | 4577.577  | 36.4000   |
| 92   | 50181.2 | 4555.884  | 36.2275   |
| 93   | 50280.0 | 4509.341  | 35.8574   |
| 94   | 50296.6 | 4501.531  | 35.7953   |
| 95   | 50607.9 | 4354.898  | 34.6293   |
| 96   | 50671.1 | 4325.131  | 34.3924   |
| 97   | 59801.7 | 25.114    | 0.1997    |
| 98   | 59855.5 | -0.264    | -0.0021   |
| 99   | 59909.8 | -25.805   | -0.2052   |

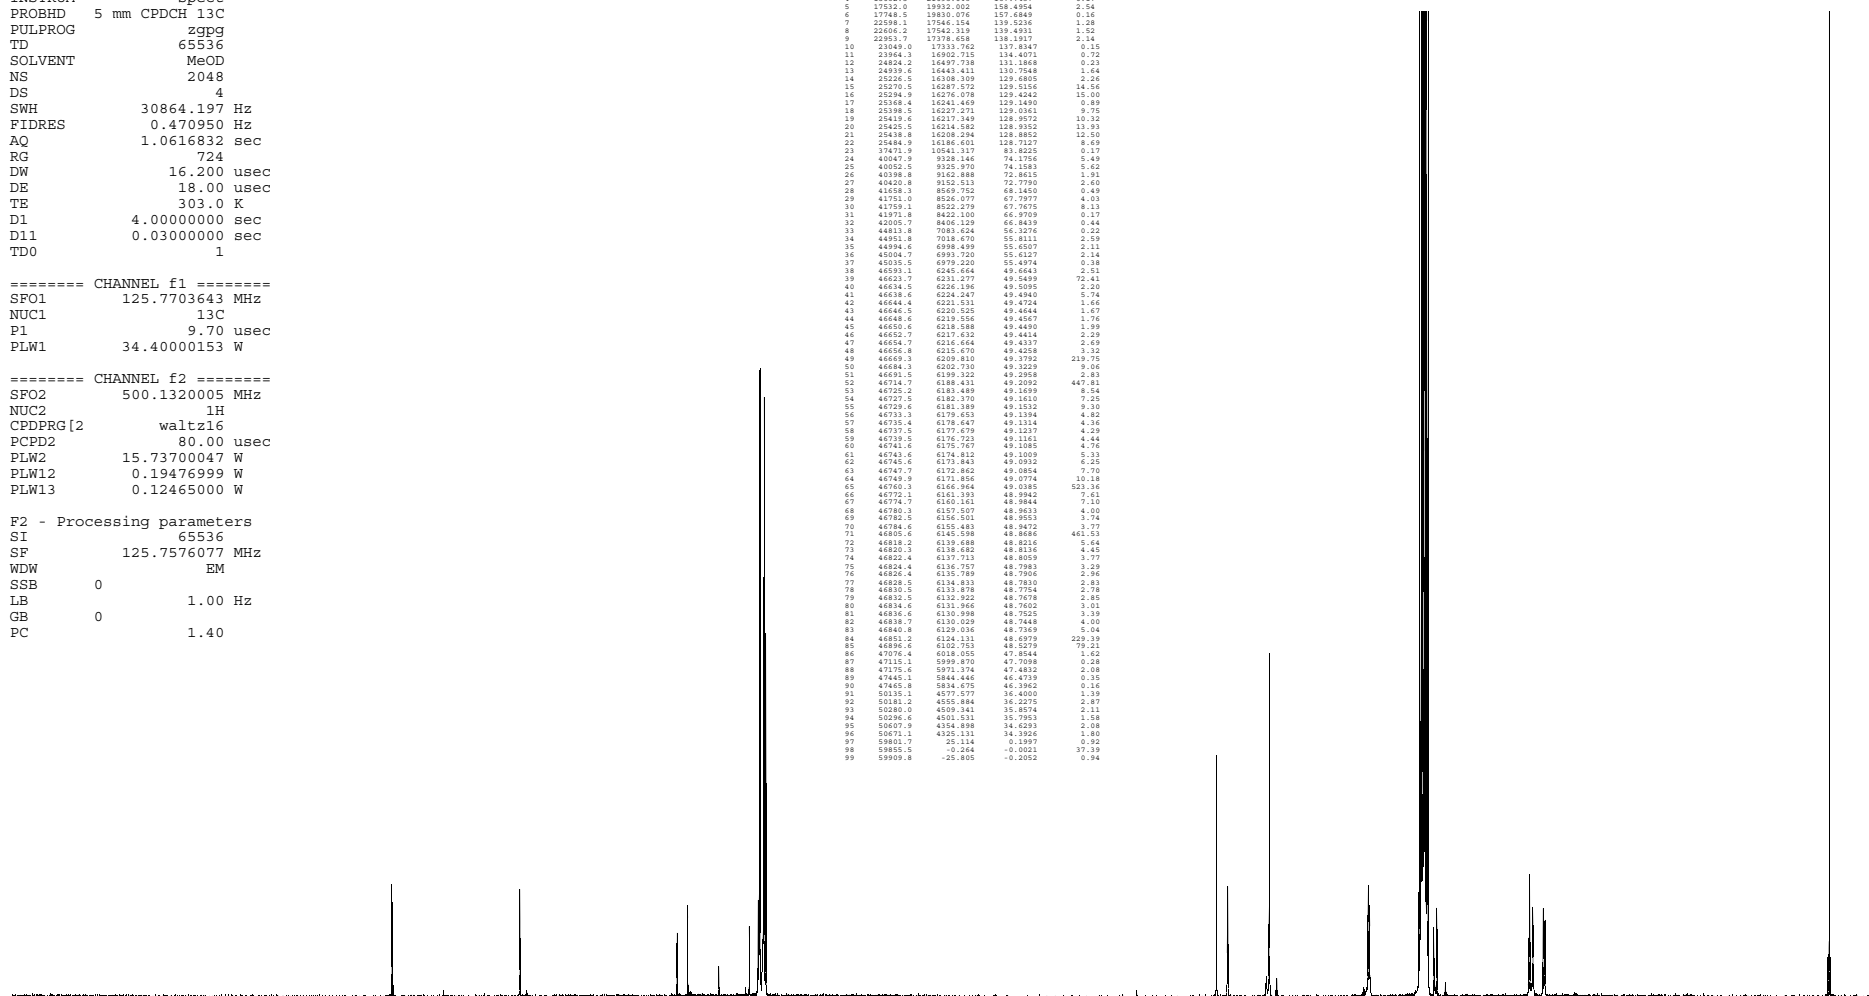

210 200 190 180 170 160 150 140 130 120 110 100 90 80 70 60 50 40 30 20 10 ppm

DU=C:\Bruker\TopSpin3.2\data\SamTrack\mr, USER=hwp008, NAME=50039067, EXPRNO=502, PROCNO=1  
F1=219.769ppm, F2=16.892ppm, MI=0.50cm, MAXZ=10000.00cm, PC=1.400

| #  | ADDRESS | FREQUENCY | INTENSITY |       |
|----|---------|-----------|-----------|-------|
| 1  | 21637.2 | 16903.193 | 134.4109  | 0.56  |
| 2  | 24648.6 | 16443.901 | 130.7587  | 1.17  |
| 3  | 24846.2 | 16308.762 | 129.6841  | 1.79  |
| 4  | 24991.8 | 16286.050 | 129.5194  | 15.00 |
| 5  | 25037.0 | 16276.568 | 129.4281  | 12.69 |
| 6  | 25091.4 | 16246.815 | 129.1997  | 0.61  |
| 7  | 25124.5 | 16227.749 | 129.0399  | 7.11  |
| 8  | 25146.4 | 16217.827 | 128.9610  | 9.06  |
| 9  | 25152.6 | 16210.014 | 128.9186  | 13.12 |
| 10 | 25156.1 | 16208.795 | 128.8951  | 13.19 |
| 11 | 40221.4 | 8161.099  | 74.1458   | 6.12  |
| 12 | 40316.6 | 8128.574  | 74.1790   | -6.21 |
| 13 | 40321.4 | 8128.189  | 74.1458   | -6.13 |
| 14 | 40680.7 | 8163.240  | 72.8643   | -2.15 |
| 15 | 40703.4 | 8152.880  | 72.7824   | -2.96 |
| 16 | 42082.7 | 8526.517  | 67.8012   | -4.11 |
| 17 | 42091.1 | 8525.759  | 67.7112   | -8.99 |
| 18 | 45401.8 | 7019.224  | 55.8155   | 2.15  |
| 19 | 45446.4 | 6998.952  | 55.8543   | 1.72  |
| 20 | 45456.9 | 6994.185  | 55.8164   | 1.75  |
| 21 | 47106.1 | 6246.167  | 49.4663   | 8.45  |
| 22 | 47151.4 | 6224.687  | 49.4975   | 17.73 |
| 23 | 47196.6 | 6203.233  | 49.1209   | 26.55 |
| 24 | 47231.7 | 6188.205  | 49.2074   | 0.58  |
| 25 | 47245.9 | 6181.754  | 49.1561   | 17.06 |
| 26 | 47276.4 | 6167.393  | 49.0462   | -0.66 |
| 27 | 47291.3 | 6160.236  | 48.9850   | 8.76  |
| 28 | 47321.8 | 6146.165  | 48.8747   | -0.91 |
| 29 | 47371.2 | 6124.848  | 48.7036   | -0.68 |
| 30 | 47405.4 | 6118.520  | 47.8381   | 1.25  |
| 31 | 47705.3 | 5975.776  | 47.4864   | 1.58  |
| 32 | 50777.2 | 4578.080  | 36.4040   | -1.46 |
| 33 | 50820.3 | 4556.263  | 36.2105   | -1.00 |
| 34 | 50927.6 | 4509.794  | 35.8610   | -2.19 |
| 35 | 50944.8 | 4501.997  | 35.7990   | -1.64 |
| 36 | 51267.7 | 4355.318  | 34.6328   | -2.25 |
| 37 | 51331.1 | 4325.659  | 34.1968   | -1.87 |
| 38 | 59126.8 | 781.747   | 6.2163    | -0.77 |
| 39 | 60280.0 | 241.211   | 2.0771    | -0.80 |
| 40 | 60801.7 | 25.667    | 0.2041    | 1.70  |
| 41 | 60820.0 | 0.289     | 0.0021    | 66.76 |
| 42 | 60911.9 | -25.302   | -0.2012   | 1.55  |
| 43 | 61815.4 | -240.771  | -2.0746   | -0.77 |
| 44 | 62976.4 | -781.206  | -6.2120   | -0.84 |
| 45 | 63724.4 | -1102.609 | -11.3033  | 0.93  |

CH,CH3-Signals positive, CH2-Signals negative

DU=C:\Bruker\TopSpin3.2\data\SamTrack\mr, USER=hwp008, NAME=50039067, EXPRNO=503, PROCNO=1  
F1=219.769ppm, F2=16.892ppm, MI=0.50cm, MAXZ=10000.00cm, PC=1.400

| #  | ADDRESS | FREQUENCY | INTENSITY |       |
|----|---------|-----------|-----------|-------|
| 1  | 21638.3 | 16902.680 | 134.4069  | 0.59  |
| 2  | 24649.6 | 16443.436 | 130.7550  | 1.36  |
| 3  | 24847.2 | 16308.287 | 129.6824  | 1.77  |
| 4  | 24992.8 | 16287.585 | 129.5167  | 15.00 |
| 5  | 25038.1 | 16276.090 | 129.4243  | 12.66 |
| 6  | 25088.4 | 16244.148 | 129.1703  | 0.55  |
| 7  | 25120.6 | 16227.284 | 129.0362  | 7.09  |
| 8  | 25147.4 | 16217.349 | 128.9572  | 9.06  |
| 9  | 25150.6 | 16214.545 | 128.9347  | 13.22 |
| 10 | 25157.4 | 16208.307 | 128.8853  | 13.69 |
| 11 | 40221.4 | 8161.099  | 74.1458   | 6.15  |
| 12 | 40316.6 | 8128.574  | 74.1790   | -6.13 |
| 13 | 40321.4 | 8128.189  | 74.1458   | -6.13 |
| 14 | 40680.7 | 8163.240  | 72.8643   | -2.17 |
| 15 | 40703.4 | 8152.878  | 72.8111   | -2.99 |
| 16 | 42082.7 | 8526.517  | 67.8111   | 1.69  |
| 17 | 42091.1 | 8525.776  | 67.7111   | 1.69  |
| 18 | 45401.8 | 7019.224  | 55.8111   | 8.29  |
| 19 | 45447.5 | 6998.970  | 55.8111   | 1.69  |
| 20 | 45456.9 | 6998.970  | 55.8111   | 1.69  |
| 21 | 47106.1 | 6246.174  | 49.6447   | 8.29  |
| 22 | 47151.4 | 6224.224  | 49.4939   | 17.73 |
| 23 | 47196.6 | 6202.780  | 49.3333   | 26.00 |
| 24 | 47231.7 | 6187.891  | 49.2049   | 0.91  |
| 25 | 47245.9 | 6181.288  | 49.1524   | 16.71 |
| 26 | 47276.4 | 6166.449  | 49.0344   | 1.02  |
| 27 | 47291.3 | 6159.784  | 48.9814   | 8.60  |
| 28 | 47321.8 | 6146.107  | 48.8839   | 0.79  |
| 29 | 47371.2 | 6124.722  | 47.8839   | 1.27  |
| 30 | 47405.4 | 6117.123  | 47.4828   | 1.61  |
| 31 | 60858.6 | -0.176    | -0.0014   | 2.89  |

CH-Signals

compound 3b

210 200 190 180 170 160 150 140 130 120 110 100 90 80 70 60 50 40 30 20 10 0 ppm



compound 3b

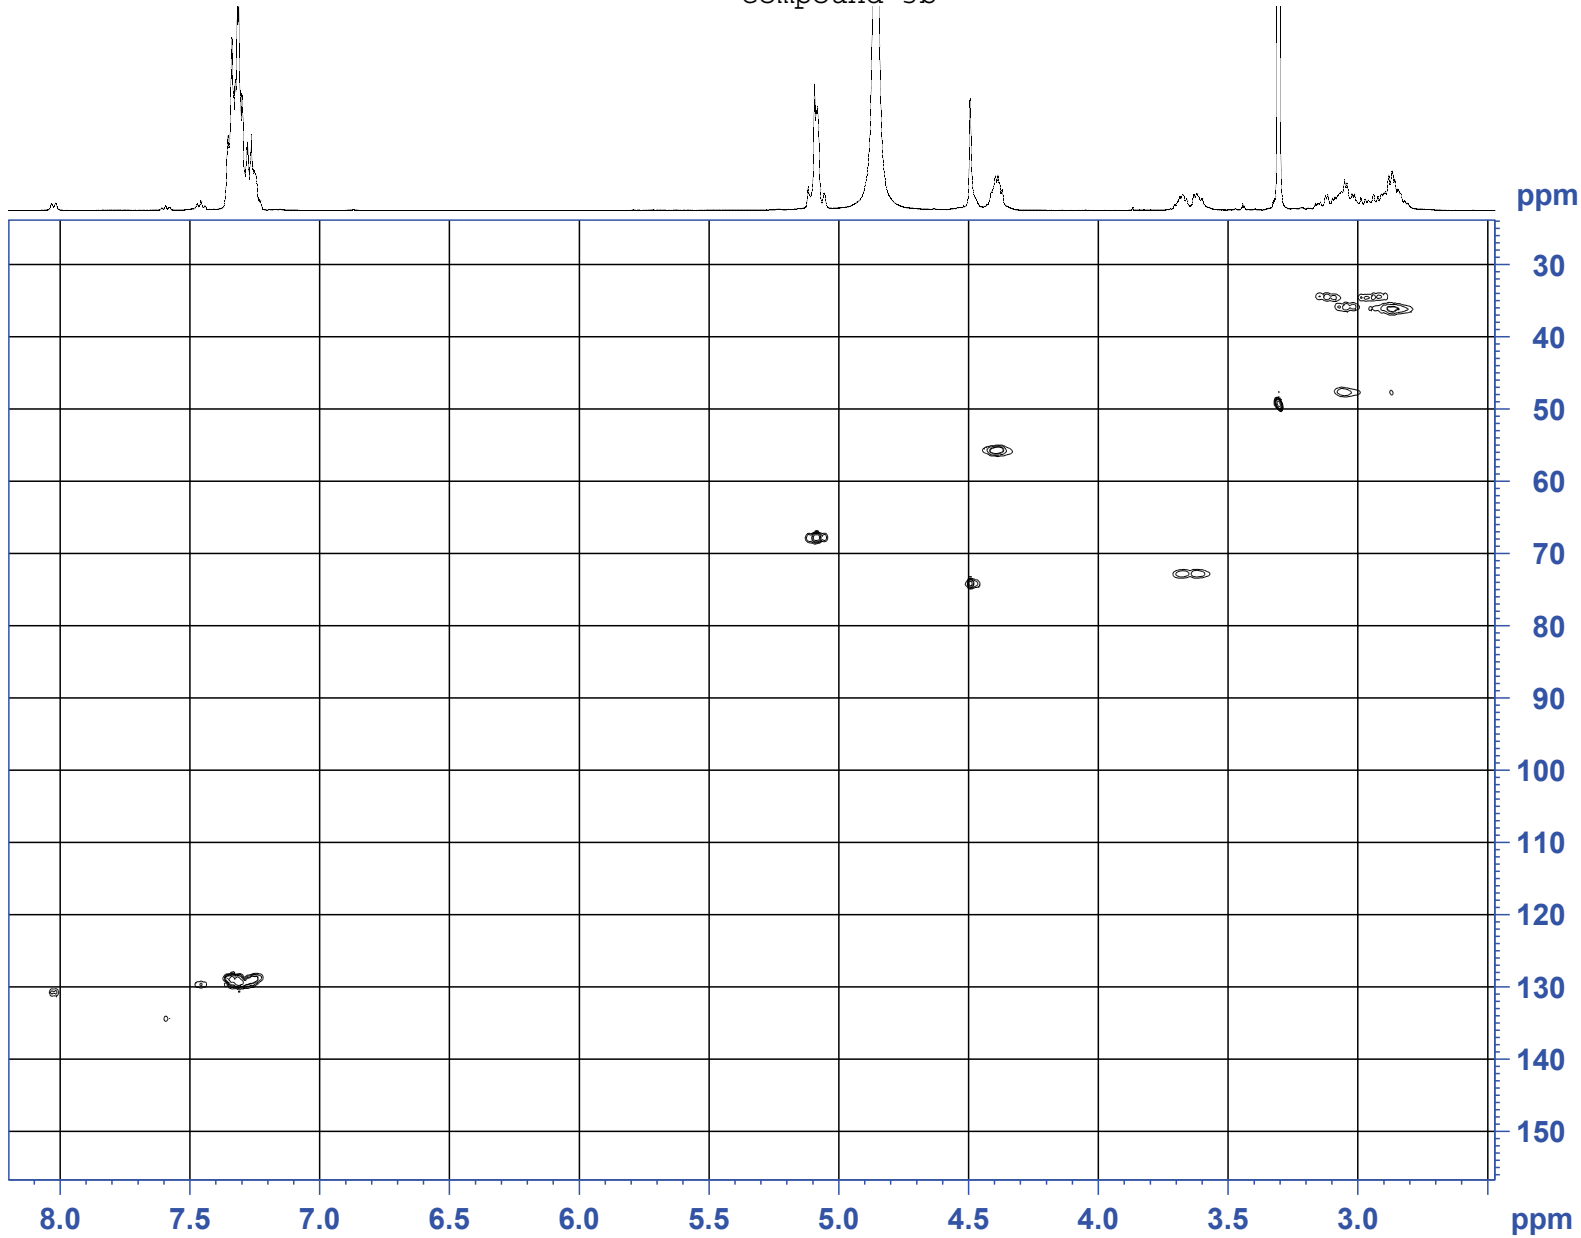

```
Current Data Parameters
NAME      50039067
EXPNO    504
PROCNO   1

F2 - Acquisition Parameters
Date_    20150217
Time     20.04
INSTRUM  spect
PROBHD   5 mm CPDCH 13C
PULPROG  hsqcetgpsi2.2
TD       2048
SOLVENT  MeOD
NS       16
DS       16
SWH      4504.504 Hz
FIDRES   2.199465 Hz
AQ       0.2273280 sec
RG       2050
DW       111.000 usec
DE       10.00 usec
TE       303.0 K
CNST2    145.0000000
CNST17   -0.5000000
D0       0.00000300 sec
D1       1.40046704 sec
D4       0.00172414 sec
D11      0.03000000 sec
D16      0.00020000 sec
D24      0.00110000 sec
IN0      0.00002090 sec

===== CHANNEL f1 =====
SF01    500.1319832 MHz
NUC1    1H
P1      8.90 usec
P2      17.80 usec
PLW1    0 usec
P28     15.73700047 W

===== CHANNEL f2 =====
SF02    125.7678496 MHz
NUC2    13C
CPDPRG2 garp
P3      9.70 usec
P14     500.00 usec
P24     2000.00 usec
PCPD2   70.00 usec
PLW0    0 W
PLW2    34.40000153 W
PLW12   0.66055000 W
SPNAM[3] Crp60,0.5,20,1
SPOAL3  0.500
SPOFFS3 0 Hz
SPW3    4.94530010 W
SPNAM[7] Crp60comp.4
SPOAL7  0.500
SPOFFS7 0 Hz
SPW7    4.94530010 W

===== GRADIENT CHANNEL =====
GPNAM[1] SMSQ10.100
GPNAM[2] SMSQ10.100
GPNAM[3] SMSQ10.100
GPNAM[4] SMSQ10.100
GPZ1    80.00 %
GPZ2    20.10 %
GPZ3    11.00 %
GPZ4    -5.00 %
P16     1000.00 usec
P19     600.00 usec

F1 - Acquisition parameters
TD      256
SF01    125.7678 MHz
FIDRES  93.450958 Hz
SW      130.219 ppm
PhMODE  Echo-Antiecho

F2 - Processing parameters
SI      2048
SF      500.1300117 MHz
WDW     QSINE
SSB     2
LB      0 Hz
GB      0
PC      1.40

F1 - Processing parameters
SI      1024
NC2     echo-antiecho
SF      125.7576077 MHz
WDW     QSINE
SSB     2
LB      0 Hz
GB      0cc
```

compound 3b

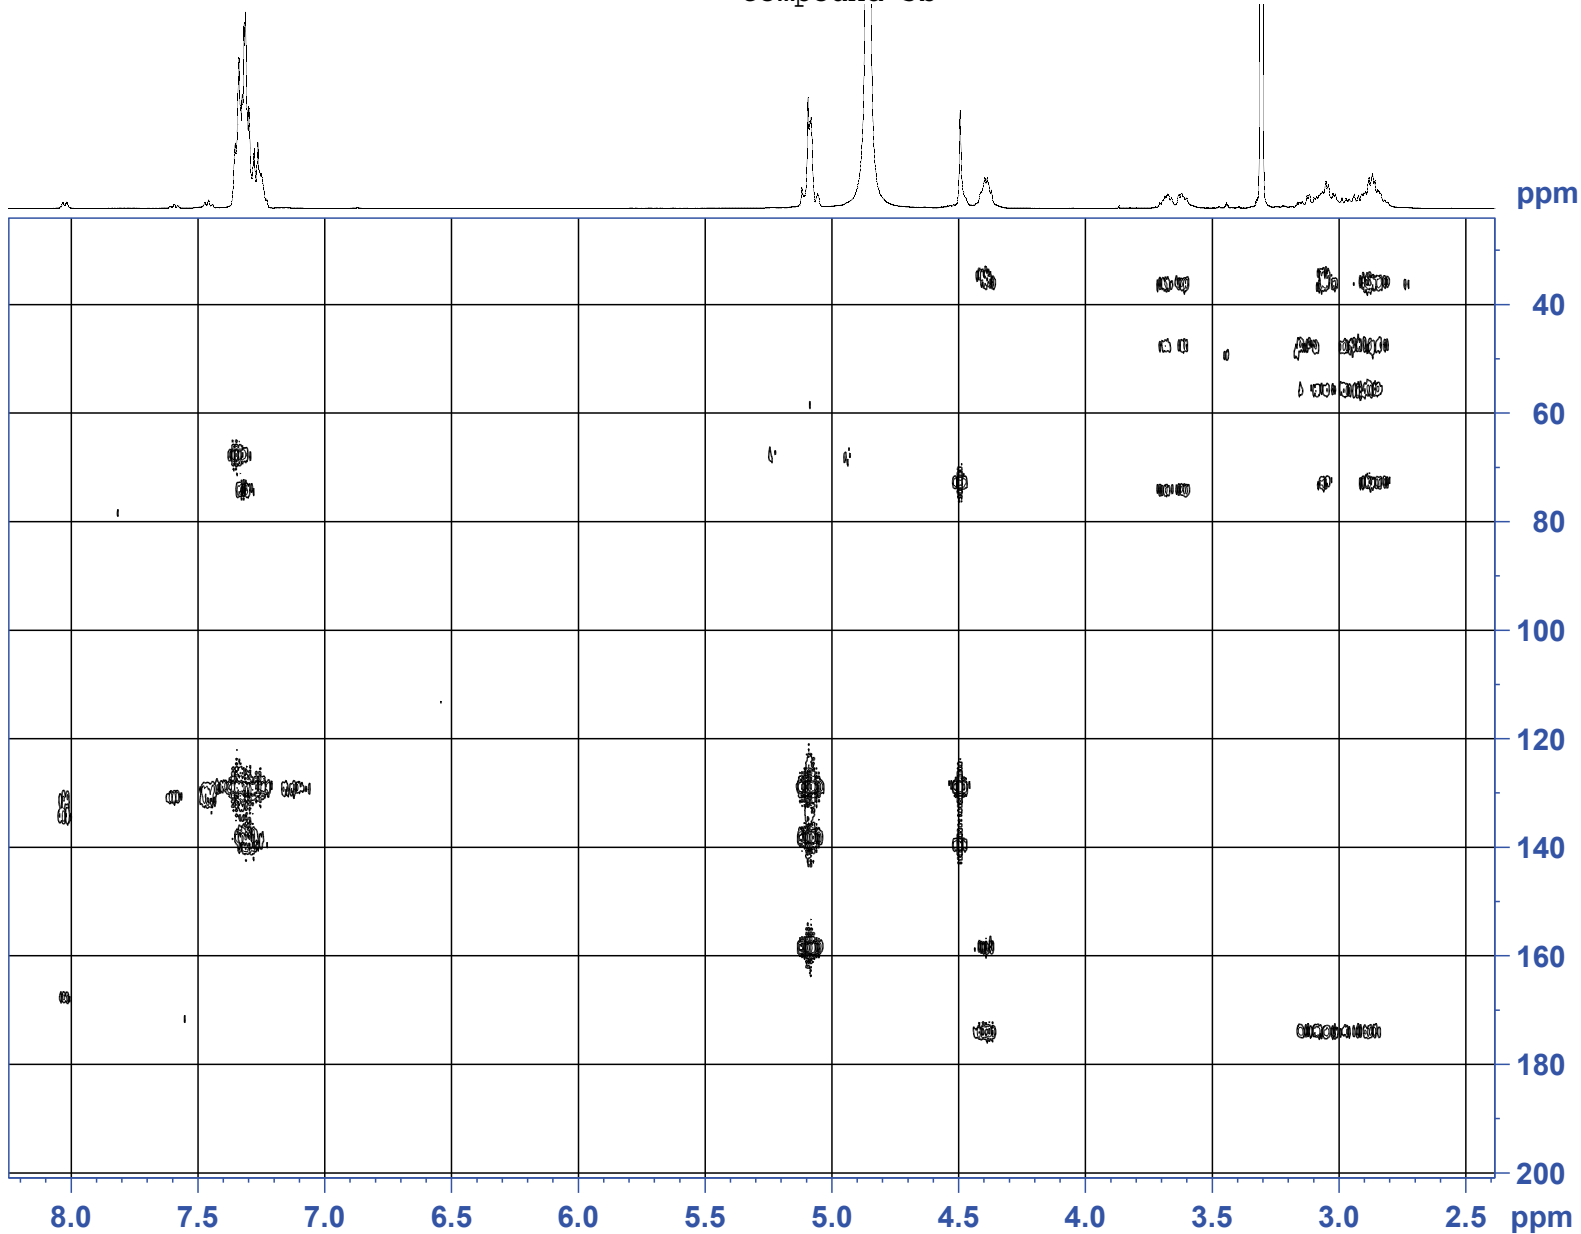

```

Current Data Parameters
NAME      50039067
EXPNO    505
PROCNO   1

F2 - Acquisition Parameters
Date_    20150217
Time     22.01
INSTRUM  spect
PROBHD   5 mm CPDCH 13C
PULPROG  hmbcetgp12nd
TD       2048
SOLVENT  MeOD
NS       32
DS       16
SWH      4504.504 Hz
FIDRES   2.199465 Hz
AQ       0.2273280 sec
RG       2050
DW       111.000 usec
DE       10.00 usec
TE       303.0 K

===== CHANNEL f1 =====
SFO1     500.1319832 MHz
NUC1     1H
P1       8.90 usec
P2       17.80 usec
PLW1     15.73700047 W

===== CHANNEL f2 =====
SFO2     125.7703443 MHz
NUC2     13C
P3       9.70 usec
P24      2000.00 usec
PLW2     34.40000153 W
SFOAL7   Crp60comp.4
SFOAL7   0.500
SPOFFS7  0 Hz
SPW7     4.94530010 W

===== GRADIENT CHANNEL =====
GPNAM[1] SMSQ10.100
GPNAM[3] SMSQ10.100
GPNAM[4] SMSQ10.100
GPNAM[5] SMSQ10.100
GPZ1     80.00 %
GPZ3     15.00 %
GPZ4     -10.00 %
GPZ5     -15.00 %
P16      1000.00 usec

F1 - Acquisition parameters
TD       256
SFO1     125.7703 MHz
FIDRES   109.113129 Hz
SW       222.095 ppm
PnMODE   Echo-Antiecho

F2 - Processing parameters
SI       2048
SF       500.1300117 MHz
WDW      SINE
SSB      0 Hz
LB       0 Hz
GB       0
PC       1.40

F1 - Processing parameters
SI       1024
MC2      echo-antiecho
SF       125.7576077 MHz
WDW      SINE
SSB      0 Hz
LB       0 Hz
GB       0
    
```

compound 3b

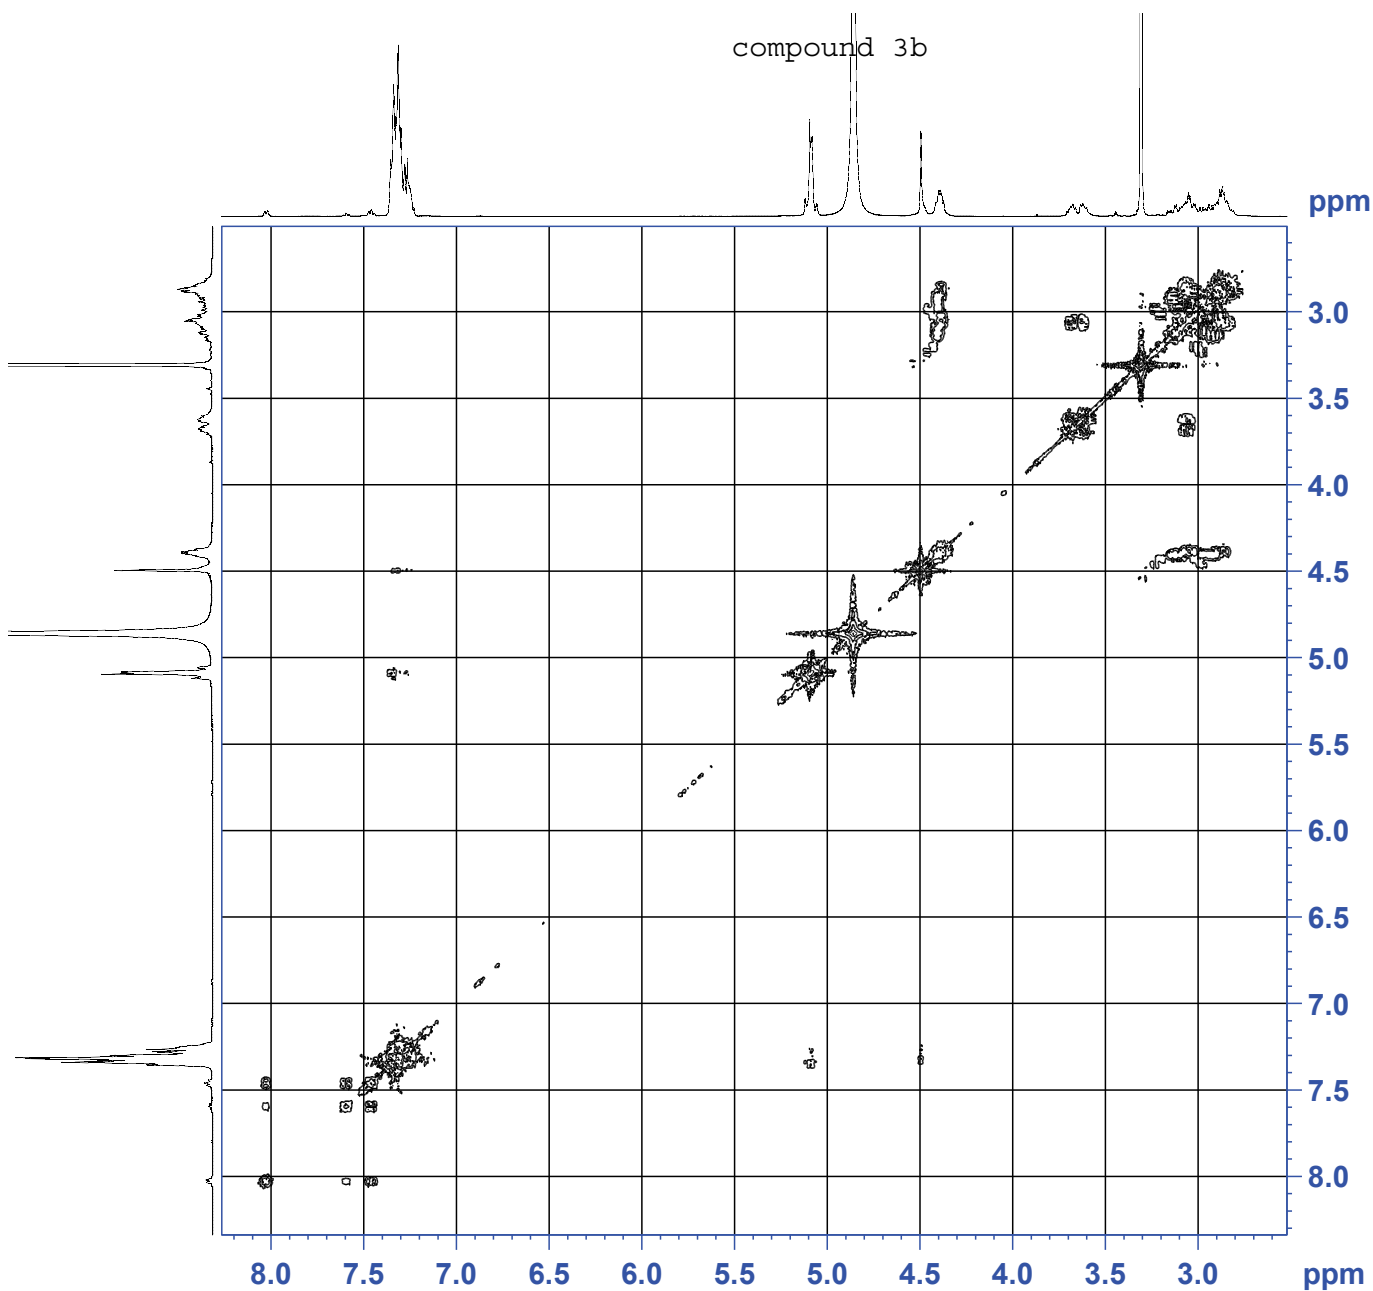

```
Current Data Parameters
NAME      50039067
EXPNO    506
PROCNO   1

F2 - Acquisition Parameters
Date_    20150218
Time     1.56
INSTRUM spect
PROBHD   5 mm CPDCH 13C
PULPROG cosygpppgf
TD       2048
SOLVENT  MeOD
NS       8
DS       16
SWH      4504.504 Hz
FIDRES   2.199465 Hz
AQ       0.2273280 sec
RG       25.4
DW       111.000 usec
DE       10.00 usec
TE       303.0 K
D0       0.00000300 sec
D1       1.38735902 sec
D11      0.03000000 sec
D12      0.00002000 sec
D13      0.00000400 sec
D16      0.00020000 sec
INO      0.00022200 sec

===== CHANNEL f1 =====
SFO1    500.1319832 MHz
        NUC1      1H
P0       8.90 usec
P1       8.90 usec
P17      2500.00 usec
PLW1    15.73700047 W
PLW10   1.84399998 W

===== GRADIENT CHANNEL =====
GPNAM[1] SMSQ10.100
GPZ1     10.00 %
P16      1000.00 usec

F1 - Acquisition parameters
TD       512
SFO1    500.132 MHz
FIDRES   8.797860 Hz
SW       9.007 ppm
        FnMODE    QF

F2 - Processing parameters
SI       2048
SF       500.1300117 MHz
WDW      SINE
        SSB       0
        LB       0 Hz
        GB       0
        PC       1.40

F1 - Processing parameters
SI       2048
MC2     QF
SF       500.1300117 MHz
WDW      SINE
        SSB       0
        LB       0 Hz
        GB       0
```

compound 3b

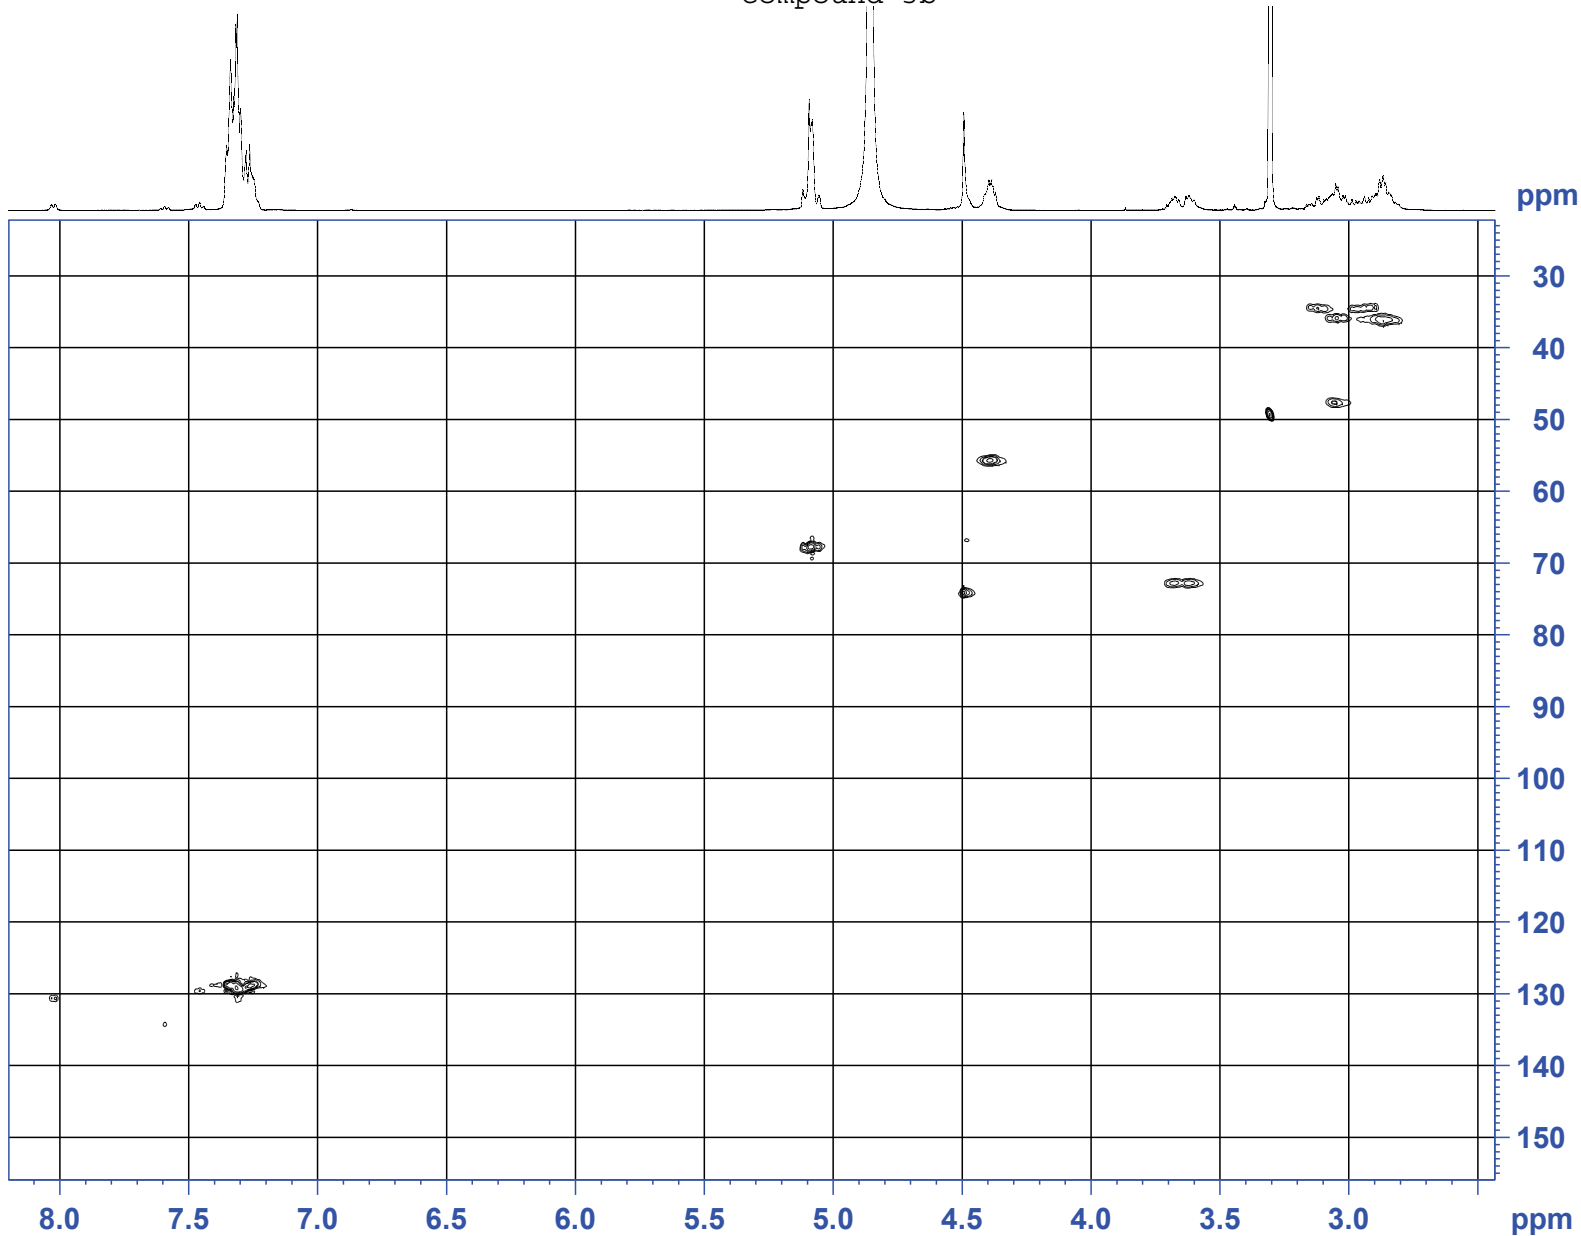

```
Current Data Parameters
NAME      50039067
EXPNO    507
PROCNO   1

F2 - Acquisition Parameters
Date_    20150218
Time     3.54
INSTRUM  spect
PROBHD   5 mm CPDCH 13C
PULPROG  hsqcdecfg
TD       2048
SOLVENT  MeOD
NS       16
DS       16
SWH      4504.504 Hz
FIDRES   2.199465 Hz
AQ       0.2273280 sec
RG       2050
DW       111.000 usec
DE       10.00 usec
TE       303.0 K
CNST2    145.0000000
D0       0.00000300 sec
D1       1.40046704 sec
D4       0.00172414 sec
D11      0.03000000 sec
D13      0.00000400 sec
D16      0.00020000 sec
D21      0.00345000 sec
IN0      0.00002090 sec
ZGPGTNS

===== CHANNEL f1 =====
SF01    500.1319832 MHz
NUC1    1H
P1      8.90 usec
P2      17.80 usec
PLM1    15.73700047 W

===== CHANNEL f2 =====
SF02    125.7678491 MHz
NUC2    13C
CPDPRG2  garp
P3      9.70 usec
P4      19.40 usec
PCPD2   70.00 usec
PLM2    34.40000153 W
PLM12   0.66055000 W

===== GRADIENT CHANNEL =====
GPNAM[1] SMSQ10.100
GPNAM[2] SMSQ10.100
GPZ1    80.00 %
GPZ2    20.10 %
P16     1000.00 usec

F1 - Acquisition parameters
TD      256
SF01    125.7678 MHz
FIDRES   93.450958 Hz
SW       130.219 ppm
PnMODE   Echo-Antiecho

F2 - Processing parameters
SI       2048
SF       500.1300117 MHz
WDW      QSINE
SSB      2
LB       0 Hz
GB       0
PC       1.40

F1 - Processing parameters
SI       1024
WC2      echo-antiecho
SF       125.7576072 MHz
WDW      QSINE
SSB      2
LB       0 Hz
GB       0
```

compound 3c

NAME 62155052  
EXPNO 500  
PROCNO 1  
Date\_ 20140116  
Time 8.06  
INSTRUM spect  
PROBHD 5 mm CPDCH 13C  
PULPROG zg30  
TD 65536  
SOLVENT MeOD  
NS 32  
DS 2  
SWH 10330.578 Hz  
FIDRES 0.157632 Hz  
AQ 3.1719923 sec  
RG 8  
DW 48.400 usec  
DE 6.50 usec  
TE 303.0 K  
DL 1.00000000 sec  
TD0 1

===== CHANNEL f1 =====  
NUC1 1H  
P1 8.90 usec  
PL1 3.00 dB  
PL1W 15.73656750 W  
SFO1 500.1330885 MHz  
SI 32768  
SF 500.1300132 MHz  
WDW EM  
SSB 0  
LB 0.30 Hz  
GB 0  
EC 1.00

| F2 | F1      | Phase    | Amplitude | Phase |
|----|---------|----------|-----------|-------|
| 1  | 14454.8 | 1921     | 1.1814    | 6.34  |
| 2  | 14454.4 | 2879.554 | 1.2188    | 6.49  |
| 3  | 14377.3 | 2879.552 | 1.2188    | 6.49  |
| 4  | 14377.3 | 2879.552 | 1.2188    | 6.49  |
| 5  | 14377.3 | 2879.552 | 1.2188    | 6.49  |
| 6  | 14377.3 | 2879.552 | 1.2188    | 6.49  |
| 7  | 14377.3 | 2879.552 | 1.2188    | 6.49  |
| 8  | 14377.3 | 2879.552 | 1.2188    | 6.49  |
| 9  | 14377.3 | 2879.552 | 1.2188    | 6.49  |
| 10 | 17925.1 | 2588.222 | 1.1709    | 6.22  |
| 11 | 18025.3 | 2588.222 | 1.1709    | 6.22  |
| 12 | 18025.3 | 2588.222 | 1.1709    | 6.22  |
| 13 | 18025.3 | 2588.222 | 1.1709    | 6.22  |
| 14 | 18025.3 | 2588.222 | 1.1709    | 6.22  |
| 15 | 18025.3 | 2588.222 | 1.1709    | 6.22  |
| 16 | 18025.3 | 2588.222 | 1.1709    | 6.22  |
| 17 | 18025.3 | 2588.222 | 1.1709    | 6.22  |
| 18 | 18025.3 | 2588.222 | 1.1709    | 6.22  |
| 19 | 20977.0 | 1571.038 | 1.4425    | 5.14  |
| 20 | 20977.0 | 1571.038 | 1.4425    | 5.14  |
| 21 | 20977.0 | 1571.038 | 1.4425    | 5.14  |
| 22 | 20977.0 | 1571.038 | 1.4425    | 5.14  |
| 23 | 20977.0 | 1571.038 | 1.4425    | 5.14  |
| 24 | 20977.0 | 1571.038 | 1.4425    | 5.14  |
| 25 | 20977.0 | 1571.038 | 1.4425    | 5.14  |
| 26 | 20977.0 | 1571.038 | 1.4425    | 5.14  |
| 27 | 20977.0 | 1571.038 | 1.4425    | 5.14  |
| 28 | 20977.0 | 1571.038 | 1.4425    | 5.14  |
| 29 | 20977.0 | 1571.038 | 1.4425    | 5.14  |
| 30 | 20977.0 | 1571.038 | 1.4425    | 5.14  |
| 31 | 20977.0 | 1571.038 | 1.4425    | 5.14  |
| 32 | 20977.0 | 1571.038 | 1.4425    | 5.14  |
| 33 | 20977.0 | 1571.038 | 1.4425    | 5.14  |
| 34 | 20977.0 | 1571.038 | 1.4425    | 5.14  |
| 35 | 20977.0 | 1571.038 | 1.4425    | 5.14  |
| 36 | 20977.0 | 1571.038 | 1.4425    | 5.14  |
| 37 | 20977.0 | 1571.038 | 1.4425    | 5.14  |
| 38 | 20977.0 | 1571.038 | 1.4425    | 5.14  |
| 39 | 20977.0 | 1571.038 | 1.4425    | 5.14  |
| 40 | 20977.0 | 1571.038 | 1.4425    | 5.14  |
| 41 | 20977.0 | 1571.038 | 1.4425    | 5.14  |
| 42 | 21477.4 | 1489.287 | 1.2755    | 6.43  |
| 43 | 21477.4 | 1489.287 | 1.2755    | 6.43  |
| 44 | 21477.4 | 1489.287 | 1.2755    | 6.43  |
| 45 | 21477.4 | 1489.287 | 1.2755    | 6.43  |
| 46 | 21477.4 | 1489.287 | 1.2755    | 6.43  |
| 47 | 21477.4 | 1489.287 | 1.2755    | 6.43  |
| 48 | 21477.4 | 1489.287 | 1.2755    | 6.43  |
| 49 | 21477.4 | 1489.287 | 1.2755    | 6.43  |
| 50 | 21477.4 | 1489.287 | 1.2755    | 6.43  |
| 51 | 21477.4 | 1489.287 | 1.2755    | 6.43  |
| 52 | 21477.4 | 1489.287 | 1.2755    | 6.43  |
| 53 | 21477.4 | 1489.287 | 1.2755    | 6.43  |
| 54 | 21477.4 | 1489.287 | 1.2755    | 6.43  |
| 55 | 21477.4 | 1489.287 | 1.2755    | 6.43  |
| 56 | 21477.4 | 1489.287 | 1.2755    | 6.43  |
| 57 | 21477.4 | 1489.287 | 1.2755    | 6.43  |
| 58 | 21477.4 | 1489.287 | 1.2755    | 6.43  |
| 59 | 21477.4 | 1489.287 | 1.2755    | 6.43  |
| 60 | 21477.4 | 1489.287 | 1.2755    | 6.43  |
| 61 | 21477.4 | 1489.287 | 1.2755    | 6.43  |
| 62 | 21477.4 | 1489.287 | 1.2755    | 6.43  |
| 63 | 21477.4 | 1489.287 | 1.2755    | 6.43  |
| 64 | 21477.4 | 1489.287 | 1.2755    | 6.43  |
| 65 | 21477.4 | 1489.287 | 1.2755    | 6.43  |
| 66 | 21477.4 | 1489.287 | 1.2755    | 6.43  |
| 67 | 21477.4 | 1489.287 | 1.2755    | 6.43  |
| 68 | 21477.4 | 1489.287 | 1.2755    | 6.43  |
| 69 | 21477.4 | 1489.287 | 1.2755    | 6.43  |
| 70 | 21477.4 | 1489.287 | 1.2755    | 6.43  |
| 71 | 21477.4 | 1489.287 | 1.2755    | 6.43  |
| 72 | 21477.4 | 1489.287 | 1.2755    | 6.43  |
| 73 | 21477.4 | 1489.287 | 1.2755    | 6.43  |
| 74 | 21477.4 | 1489.287 | 1.2755    | 6.43  |
| 75 | 21477.4 | 1489.287 | 1.2755    | 6.43  |
| 76 | 21477.4 | 1489.287 | 1.2755    | 6.43  |
| 77 | 21477.4 | 1489.287 | 1.2755    | 6.43  |
| 78 | 21477.4 | 1489.287 | 1.2755    | 6.43  |
| 79 | 21477.4 | 1489.287 | 1.2755    | 6.43  |
| 80 | 21477.4 | 1489.287 | 1.2755    | 6.43  |
| 81 | 21477.4 | 1489.287 | 1.2755    | 6.43  |
| 82 | 21477.4 | 1489.287 | 1.2755    | 6.43  |
| 83 | 21477.4 | 1489.287 | 1.2755    | 6.43  |
| 84 | 21477.4 | 1489.287 | 1.2755    | 6.43  |
| 85 | 21477.4 | 1489.287 | 1.2755    | 6.43  |
| 86 | 21477.4 | 1489.287 | 1.2755    | 6.43  |
| 87 | 21477.4 | 1489.287 | 1.2755    | 6.43  |
| 88 | 21477.4 | 1489.287 | 1.2755    | 6.43  |
| 89 | 21477.4 | 1489.287 | 1.2755    | 6.43  |
| 90 | 21477.4 | 1489.287 | 1.2755    | 6.43  |
| 91 | 21477.4 | 1489.287 | 1.2755    | 6.43  |
| 92 | 21477.4 | 1489.287 | 1.2755    | 6.43  |
| 93 | 21477.4 | 1489.287 | 1.2755    | 6.43  |
| 94 | 21477.4 | 1489.287 | 1.2755    | 6.43  |
| 95 | 21477.4 | 1489.287 | 1.2755    | 6.43  |
| 96 | 21477.4 | 1489.287 | 1.2755    | 6.43  |

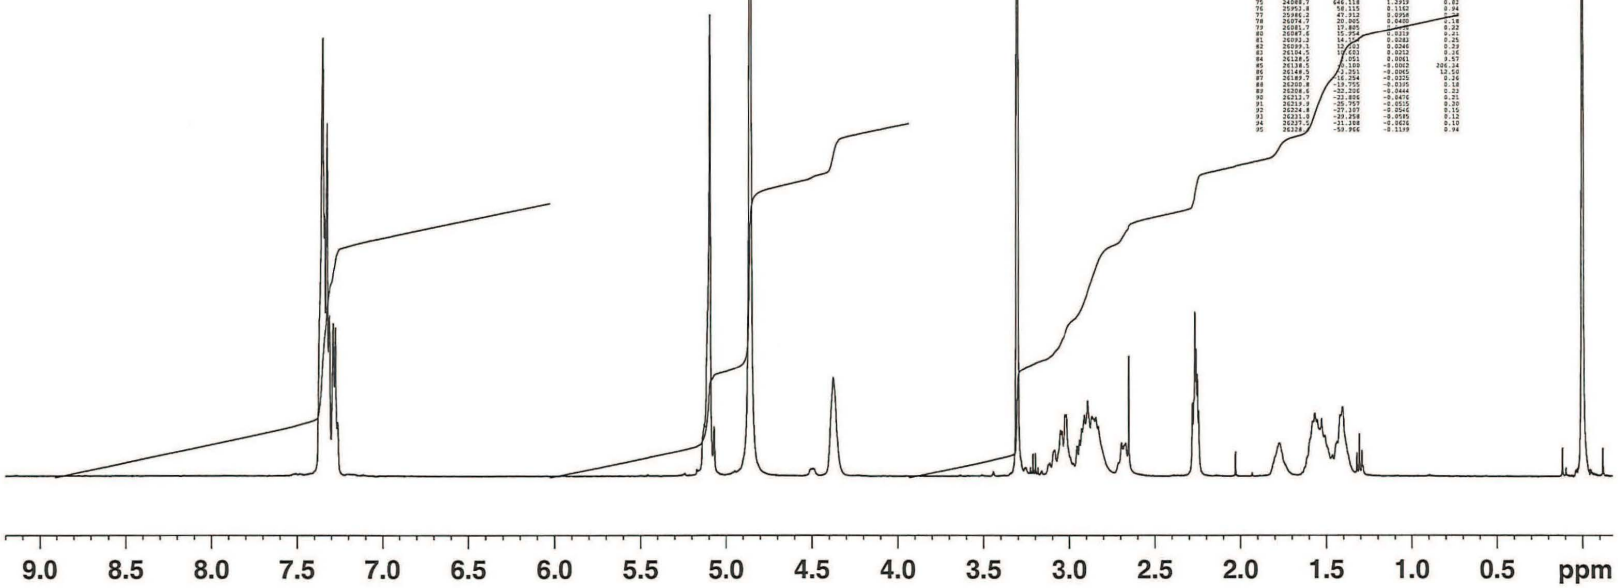

2

```

NAME          62155052
EXPNO         501
PROCNO        1
Date_         20140116
Time          11.07
INSTRUM       spect
PROBHD        5 mm CPDCH 13C
PULPROG       zgpg
TD            65536
SOLVENT       MeOD
NS            1024
DS            4
SWH           30864.197 Hz
FIDRES        0.470950 Hz
AQ            1.0617332 sec
RG            645
DW            16.200 usec
DE            20.00 usec
TE            303.0 K
DL            4.0000000 sec
D11           0.03000000 sec
TDD           1

===== CHANNEL f1 =====
NUC1           13C
P1             9.70 usec
PL1            4.00 dB
PL1W          34.40000153 W
SFO1          125.7703643 MHz

===== CHANNEL f2 =====
CPDPRG2       waltz16
NUC2           1H
PCPD2         80.00 usec
PL2            3.00 dB
PL12          22.07 dB
PL13          25.00 dB
PL2W          15.73656750 W
PL12W         0.19494408 W
PL13W         0.0929103 W
SFO2          500.1320005 MHz
SI            65536
SF            125.7576066 MHz
WDW            EM
SSB            0
LB            1.00 Hz
GB            0
PC            1.40

```

compound 3c

EM/CPD/Topspin, UCDM=Eastrock, NAME=62155052, EXPNO=501, PROCNO=1  
F1=234.160ppm, F2=21.266ppm, MI=0.00cm, MAXT=10000.00cm, PC=1.400

| #  | ABSCISSA | FREQUENCY | INTENSITY |
|----|----------|-----------|-----------|
| 1  | 12424.5  | 22338.773 | 177.4526  |
| 2  | 13201.7  | 21925.160 | 174.2446  |
| 3  | 17524.5  | 19325.523 | 198.2524  |
| 4  | 17544.2  | 19327.173 | 198.4570  |
| 5  | 22575.1  | 17527.887 | 198.6169  |
| 6  | 22940.9  | 17385.612 | 198.2470  |
| 7  | 23885.2  | 16940.183 | 197.2106  |
| 8  | 24107.0  | 16836.416 | 197.8739  |
| 9  | 24650.4  | 16373.419 | 197.7886  |
| 10 | 25268.5  | 16280.395 | 199.5301  |
| 11 | 25393.8  | 16290.415 | 199.0611  |
| 12 | 25417.9  | 16219.034 | 198.9706  |
| 13 | 25429.9  | 16212.387 | 198.9611  |
| 14 | 41659.7  | 8549.966  | 68.1467   |
| 15 | 41756.5  | 8524.293  | 67.7863   |
| 16 | 44845.9  | 7069.439  | 56.2148   |
| 17 | 44955.9  | 7077.603  | 56.8026   |
| 18 | 44985.8  | 7003.542  | 55.4908   |
| 19 | 45111.2  | 6897.365  | 54.8465   |
| 20 | 45203.5  | 6746.380  | 49.6700   |
| 21 | 46624.2  | 6231.956  | 49.5523   |
| 22 | 46639.1  | 6234.939  | 49.4995   |
| 23 | 46645.0  | 6222.134  | 49.4772   |
| 24 | 46647.1  | 6231.153  | 49.4634   |
| 25 | 46659.7  | 6210.489  | 49.2846   |
| 26 | 46684.3  | 6203.648  | 49.2302   |
| 27 | 46690.0  | 6200.322  | 49.2086   |
| 28 | 46692.1  | 6199.938  | 49.2007   |
| 29 | 46715.1  | 6189.110  | 49.2146   |
| 30 | 46729.9  | 6182.156  | 49.1993   |
| 31 | 46731.9  | 6180.729  | 49.1465   |
| 32 | 46736.0  | 6179.301  | 49.1366   |
| 33 | 46738.0  | 6178.320  | 49.1288   |
| 34 | 46740.0  | 6177.377  | 49.1213   |
| 35 | 46742.1  | 6176.396  | 49.1135   |
| 36 | 46744.2  | 6175.460  | 49.1059   |
| 37 | 46746.2  | 6174.460  | 49.0981   |
| 38 | 46748.4  | 6173.460  | 49.0902   |
| 39 | 46750.7  | 6172.460  | 49.0841   |
| 40 | 46774.7  | 6161.094  | 48.9915   |
| 41 | 46778.8  | 6159.113  | 48.9808   |
| 42 | 46781.0  | 6158.113  | 48.9808   |
| 43 | 46783.0  | 6157.130  | 48.9603   |
| 44 | 46785.0  | 6156.187  | 48.9608   |
| 45 | 46787.2  | 6155.181  | 48.9448   |
| 46 | 46809.0  | 6144.272  | 48.9708   |
| 47 | 46822.7  | 6138.455  | 48.8118   |
| 48 | 46824.8  | 6137.452  | 48.8039   |
| 49 | 46826.9  | 6136.481  | 48.7961   |
| 50 | 46829.0  | 6135.500  | 48.7883   |
| 51 | 46831.0  | 6134.544  | 48.7807   |
| 52 | 46833.1  | 6133.563  | 48.7729   |
| 53 | 46835.1  | 6132.620  | 48.7654   |
| 54 | 46837.2  | 6131.639  | 48.7576   |
| 55 | 46839.2  | 6130.658  | 48.7498   |
| 56 | 46841.4  | 6129.678  | 48.7420   |
| 57 | 46847.1  | 6103.432  | 48.5332   |
| 58 | 47042.9  | 6024.793  | 47.9872   |
| 59 | 47164.1  | 5976.743  | 47.5259   |
| 60 | 47302.8  | 5928.396  | 47.0199   |
| 61 | 48806.3  | 5204.290  | 41.1835   |
| 62 | 48952.3  | 5088.417  | 40.4633   |
| 63 | 49280.0  | 4981.208  | 39.6096   |
| 64 | 50138.4  | 4822.530  | 38.6450   |
| 65 | 50555.8  | 4780.326  | 34.8315   |
| 66 | 50602.8  | 4720.316  | 33.2509   |
| 67 | 50725.4  | 4700.495  | 34.1967   |
| 68 | 50810.5  | 4620.972  | 33.8079   |
| 69 | 50845.4  | 4243.942  | 33.7470   |
| 70 | 52668.7  | 3425.353  | 27.2834   |
| 71 | 52881.4  | 3426.367  | 27.2458   |
| 72 | 52843.4  | 2526.915  | 25.8906   |
| 73 | 57385.3  | 1163.987  | 9.2558    |
| 74 | 59897.4  | -9.226    | -0.0018   |
| 75 | 59911.7  | -25.831   | -0.2054   |

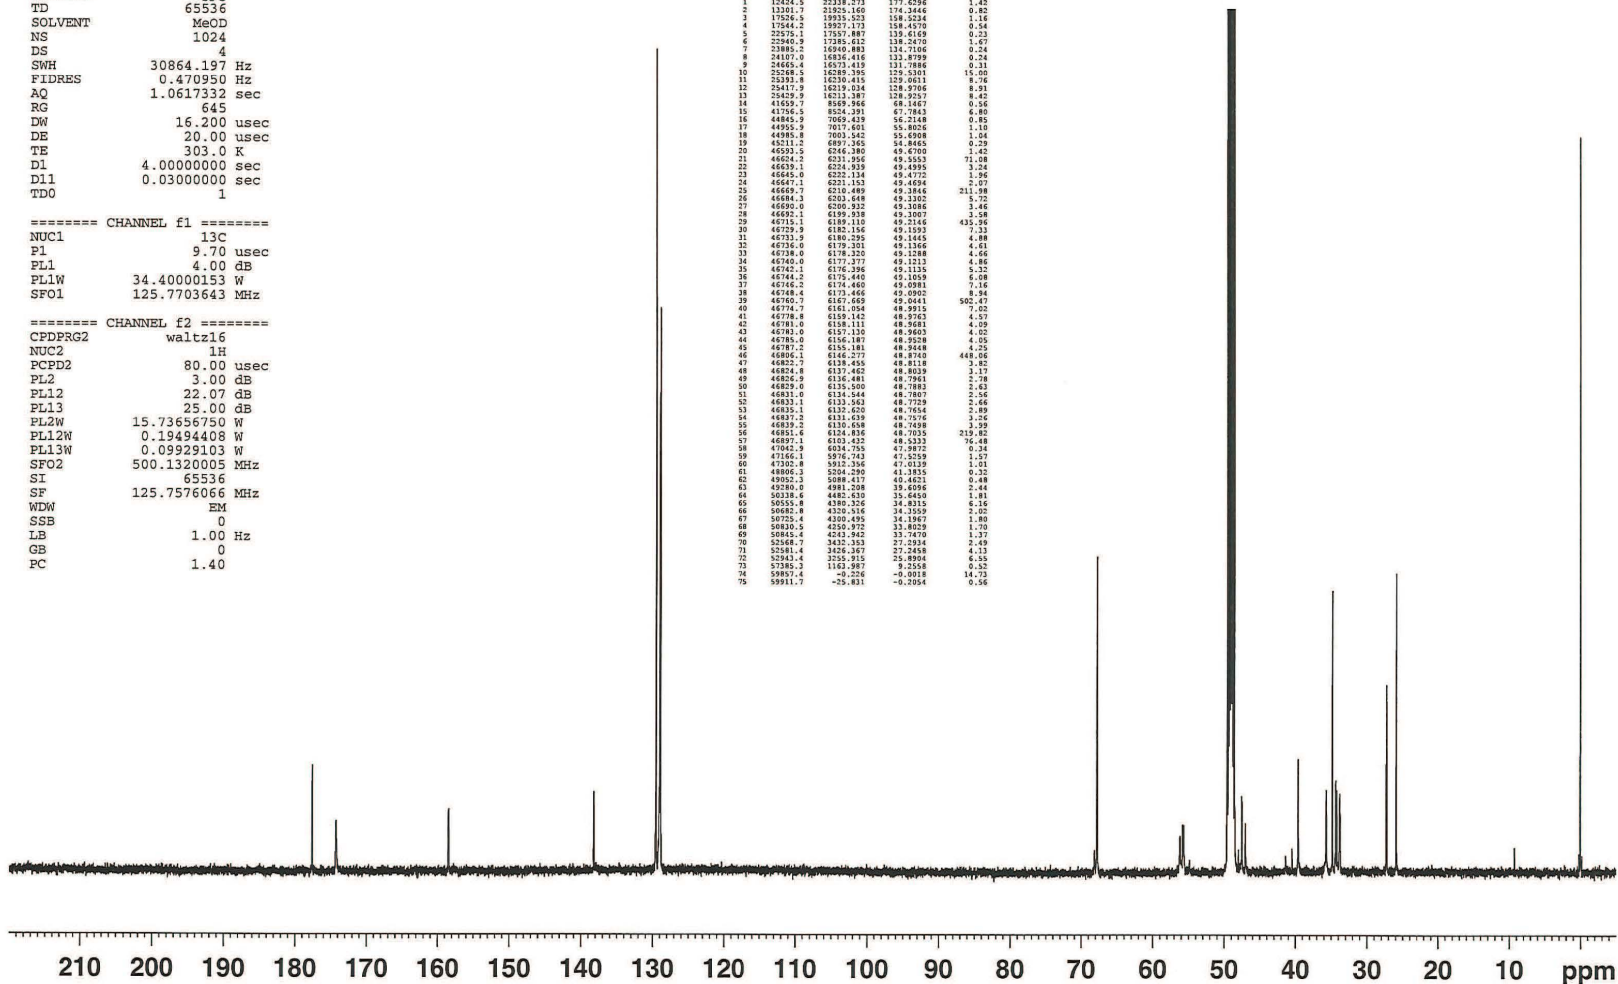

L

compound 3c

CH,CH3-signals positive, CH2-signals negative

DE=cpt/topspin, USER=SamTrack, NAME=62155052, EXPNO=502, PROCNO=1  
F1=215.778ppm, F2=16.883ppm, MI=0.50cm, MAXI=10000.00cm, PC=1.400

| #  | ADDRESS | FREQUENCY [PPM] | INTENSITY |       |
|----|---------|-----------------|-----------|-------|
| 1  | 24992.0 | 16288.842       | 129.5257  | 15.00 |
| 2  | 25123.7 | 16229.019       | 129.0500  | 6.15  |
| 3  | 25146.6 | 16218.644       | 128.9678  | 9.06  |
| 4  | 25159.2 | 16212.897       | 128.9218  | 10.92 |
| 5  | 25178.8 | 16204.056       | 128.8815  | 1.52  |
| 6  | 42089.8 | 8524.228        | 67.7830   | -5.91 |
| 7  | 45399.7 | 7066.486        | 56.1944   | 0.60  |
| 8  | 45442.2 | 7051.769        | 55.8767   | 0.74  |
| 9  | 47105.7 | 6246.355        | 49.6698   | 1.99  |
| 10 | 47152.9 | 6234.913        | 49.4993   | 4.58  |
| 11 | 47200.1 | 6203.459        | 49.3287   | 6.84  |
| 12 | 47247.4 | 6161.980        | 49.1579   | 4.37  |
| 13 | 47294.8 | 6160.463        | 48.9868   | 2.31  |
| 14 | 47698.9 | 5976.997        | 47.5276   | 1.07  |
| 15 | 47839.4 | 5913.148        | 47.0202   | 0.68  |
| 16 | 49892.2 | 4980.819        | 39.6073   | -1.78 |
| 17 | 50989.7 | 4482.504        | 35.6440   | -1.43 |
| 18 | 51214.3 | 4380.490        | 34.8328   | -4.53 |
| 19 | 51345.7 | 4330.809        | 34.3582   | -1.33 |
| 20 | 51389.4 | 4300.973        | 34.2005   | -1.12 |
| 21 | 51499.4 | 4251.035        | 33.8034   | -1.49 |
| 22 | 53301.7 | 3432.341        | 27.2949   | -1.38 |
| 23 | 53315.1 | 3426.442        | 27.2464   | -2.16 |
| 24 | 53889.1 | 3256.619        | 26.8960   | -4.20 |
| 25 | 60860.2 | 0.013           | 0.0001    | 20.63 |
| 26 | 60916.4 | -25.529         | -0.2030   | 0.70  |

DE=cpt/topspin, USER=SamTrack, NAME=62155052, EXPNO=503, PROCNO=1  
F1=215.778ppm, F2=16.883ppm, MI=0.50cm, MAXI=10000.00cm, PC=1.400

| #  | ADDRESS | FREQUENCY [PPM] | INTENSITY |       |
|----|---------|-----------------|-----------|-------|
| 1  | 24992.0 | 16288.842       | 129.5257  | 15.00 |
| 2  | 25123.8 | 16228.994       | 129.0498  | 6.21  |
| 3  | 25146.5 | 16218.682       | 128.9678  | 9.01  |
| 4  | 25159.2 | 16212.897       | 128.9218  | 11.05 |
| 5  | 25178.8 | 16204.056       | 128.8815  | 1.62  |
| 6  | 45408.3 | 7017.174        | 55.7992   | 0.69  |
| 7  | 47105.5 | 6246.405        | 49.6702   | 2.20  |
| 8  | 47152.8 | 6234.926        | 49.4994   | 4.42  |
| 9  | 47200.1 | 6203.484        | 49.3289   | 6.73  |
| 10 | 47247.3 | 6182.018        | 49.1592   | 4.42  |
| 11 | 47294.7 | 6160.500        | 48.9871   | 2.18  |
| 12 | 47699.4 | 5976.718        | 47.5257   | 0.94  |
| 13 | 47840.9 | 5912.481        | 47.0149   | 0.61  |
| 14 | 60860.2 | -0.013          | -0.0001   | 0.99  |

CH-signals

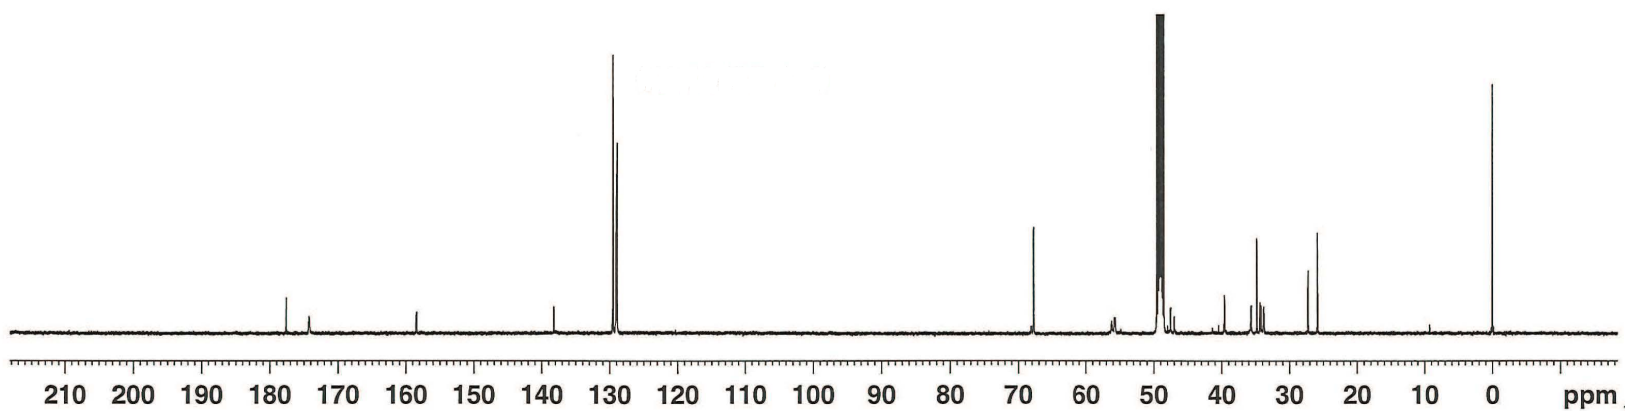

compound 3c

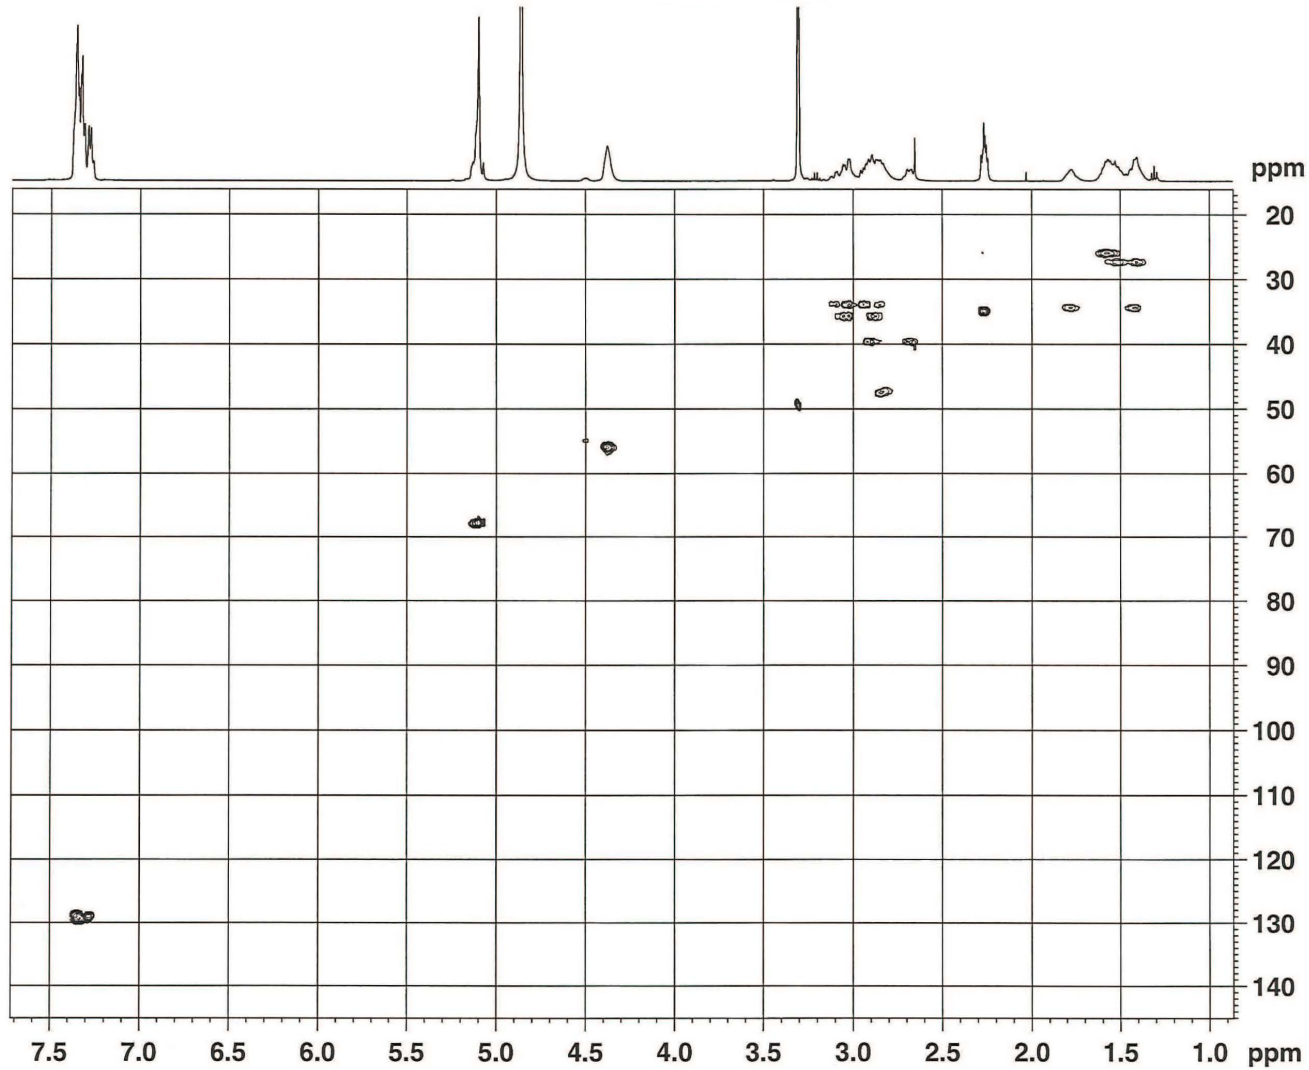

```
NAME 62155052
EXPNO 1
PROCNO 504
Date_ 20140116
Time 8.43
INSTRUM spect
PROBHD 5 mm CPDCH 13C
PULPROG hsqcetgpsisp2.2
TD 7948
SOLVENT MeOD
NS 2
DS 16
SWH 4347.826 Hz
FIDRES 2.122952 Hz
AQ 0.2355700 sec
RG 2050
DW 115.000 usec
DE 6.50 usec
TE 303.0 K
CNS22 145.0000000
CNS17 -0.5000000
DO 0.00000300 sec
DL 1.39227498 sec
D4 0.00175414 sec
D11 0.03000000 sec
D16 0.00200000 sec
D24 0.00110000 sec
IN0 0.00002090 sec

***** CHANNEL f1 *****
NUC1 1H
P1 8.90 usec
P2 17.80 usec
P28 1000.00 usec
PL1 3.00 dB
PL1W 15.7365750 W
SFO1 500.1318645 MHz

***** CHANNEL f2 *****
CPDPRG2 garp
NUC2 13C
P3 9.70 usec
P14 500.00 usec
P24 2000.00 usec
PCPD2 65.00 usec
PL0 120.00 dB
PL2 4.00 dB
PL12 20.52 dB
PL0W 0.00000000 W
PL2W 34.40000153 W
PL12W 0.7658159 W
SFO2 125.7678496 MHz
SP3 12.42 dB
SP7 12.42 dB
SFO3 Crp60,0.5,20.1
SFO4 Crp60comp,4
SFOAL3 0.500
SFOAL7 0.500
SPOFFS3 0.00 Hz
SPOFFS7 0.00 Hz

***** GRADIENT CHANNEL *****
GPNAM1 SINE.100
GPNAM2 SINE.100
GPNAM3 SINE.100
GPNAM4 SINE.100
GPZ1 80.00 %
GPZ2 20.10 %
GPZ3 11.00 %
GPZ4 -5.00 %
P16 1000.00 usec
P19 600.00 usec
ND0 2
TD 256
SFO1 125.7678 MHz
FIDRES 93.342123 Hz
SW 190.000 ppm
FmMODE Echo-Antiecho
SI 2048
SF 500.1300132 MHz
WDW QSINE
SSB 2
LB 0.00 Hz
GB 0
PC 1.40
SI 1024
MC2 echo-antiecho
SF 125.7576066 MHz
WDW QSINE
SSB 2
LB 0.00 Hz
GB 0
```

K



compound 3c

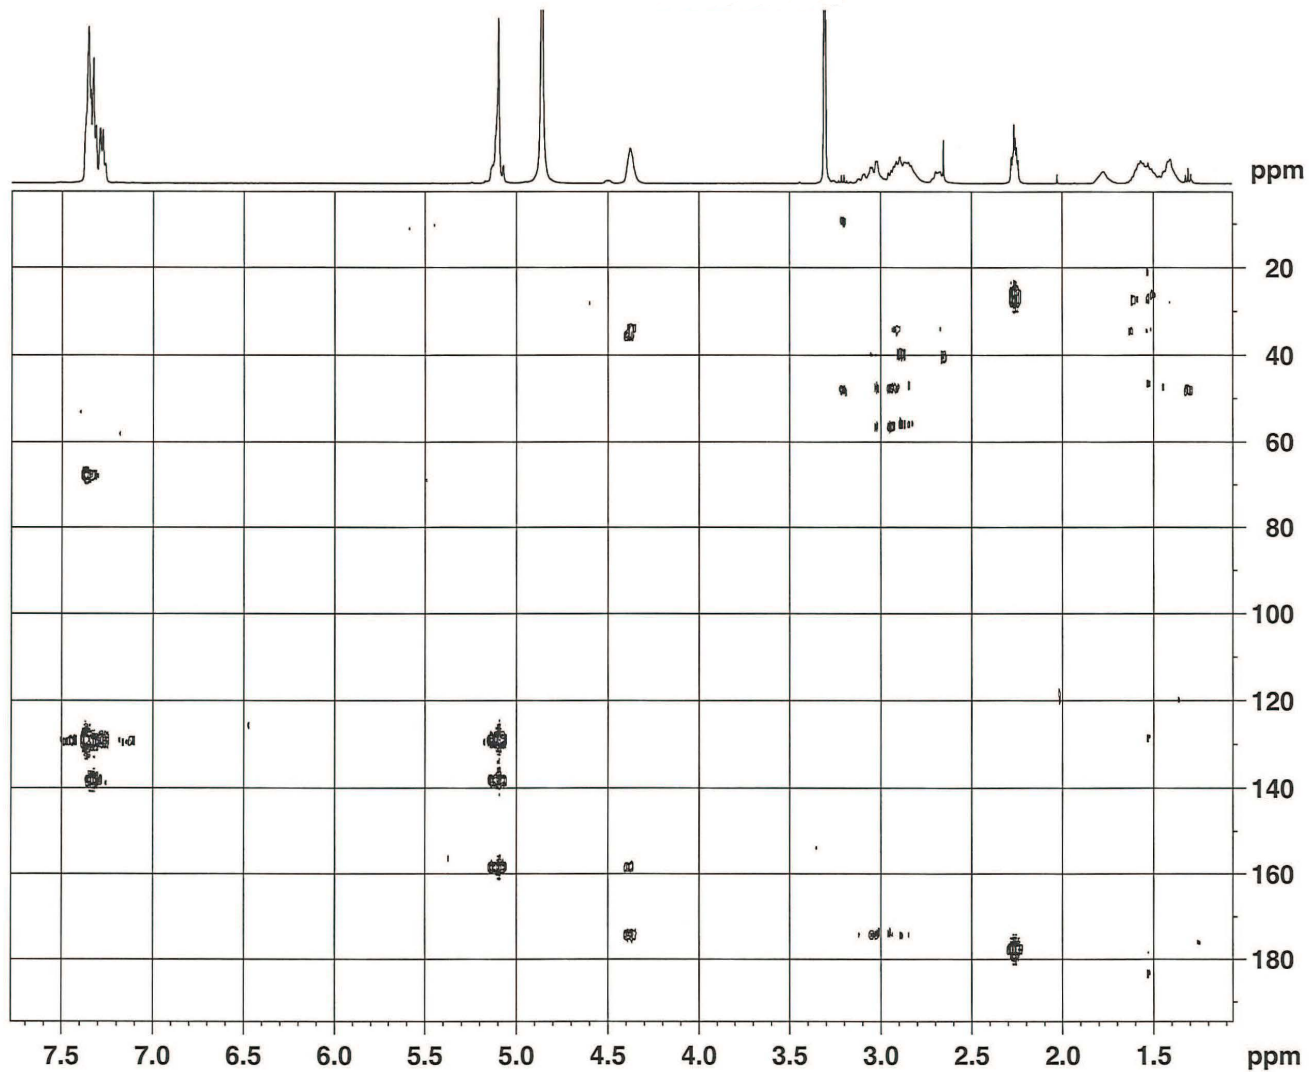

```
NAME 62155052
EXPNO 505
PROCNO 1
Date_ 20140116
Time 11.08
INSTRUM spect
PROBHD 5 mm CPDCH 13C
FULPROG hmbcetsp12nd
TD 2048
SOLVENT MeOD
NS 16
DS 16
SWH 4347.826 Hz
FIDRES 2.122962 Hz
AQ 0.2355700 sec
RG 2050
DW 115.000 usec
DE 6.50 usec
TE 303.0 K
CNS*6 125.0000000
CNS*7 160.0000000
CNS*13 10.0000000
CNS*30 0.5981150
D0 0.00000300 sec
D1 1.42176604 sec
D5 0.05000000 sec
D16 0.00020000 sec
IN0 0.00001790 sec

===== CHANNEL f1 =====
NUC1 1H
P1 8.90 usec
P2 17.80 usec
PL1 3.00 dB
PL1W 15.73656750 W
SFO1 500.1318645 MHz

===== CHANNEL f2 =====
NUC2 13C
P3 9.70 usec
P24 2000.00 usec
PL2 4.00 dB
PL2W 34.40000153 W
SFO2 125.7703443 MHz
SP7 12.42 dB
SPNAM7 Crp60comp.4
SFOAL7 0.500
SPOFFS7 0.00 Hz

===== GRADIENT CHANNEL =====
GPNAM1 SINE.100
GPNAM3 SINE.100
GPNAM4 SINE.100
GPNAM5 SINE.100
GPZ1 80.00 %
GPZ3 15.00 %
GPZ4 -10.00 %
GPZ5 -5.00 %
P16 NDO 1000.00 usec 2
TD 256
SFO1 125.7703 MHz
FIDRES 109.113174 Hz
SW 222.095 ppm
FnMODE Echo-Antiecho
SI 2048
SF 500.1300132 MHz
WDW SINE
SSB 0
LB 0.00 Hz
GB 0
PC 1.40
SI 1024
MC2 echo-antiecho
SF 125.7576066 MHz
WDW SINE
SSB 0
LB 0.00 Hz
GB 0
```

6

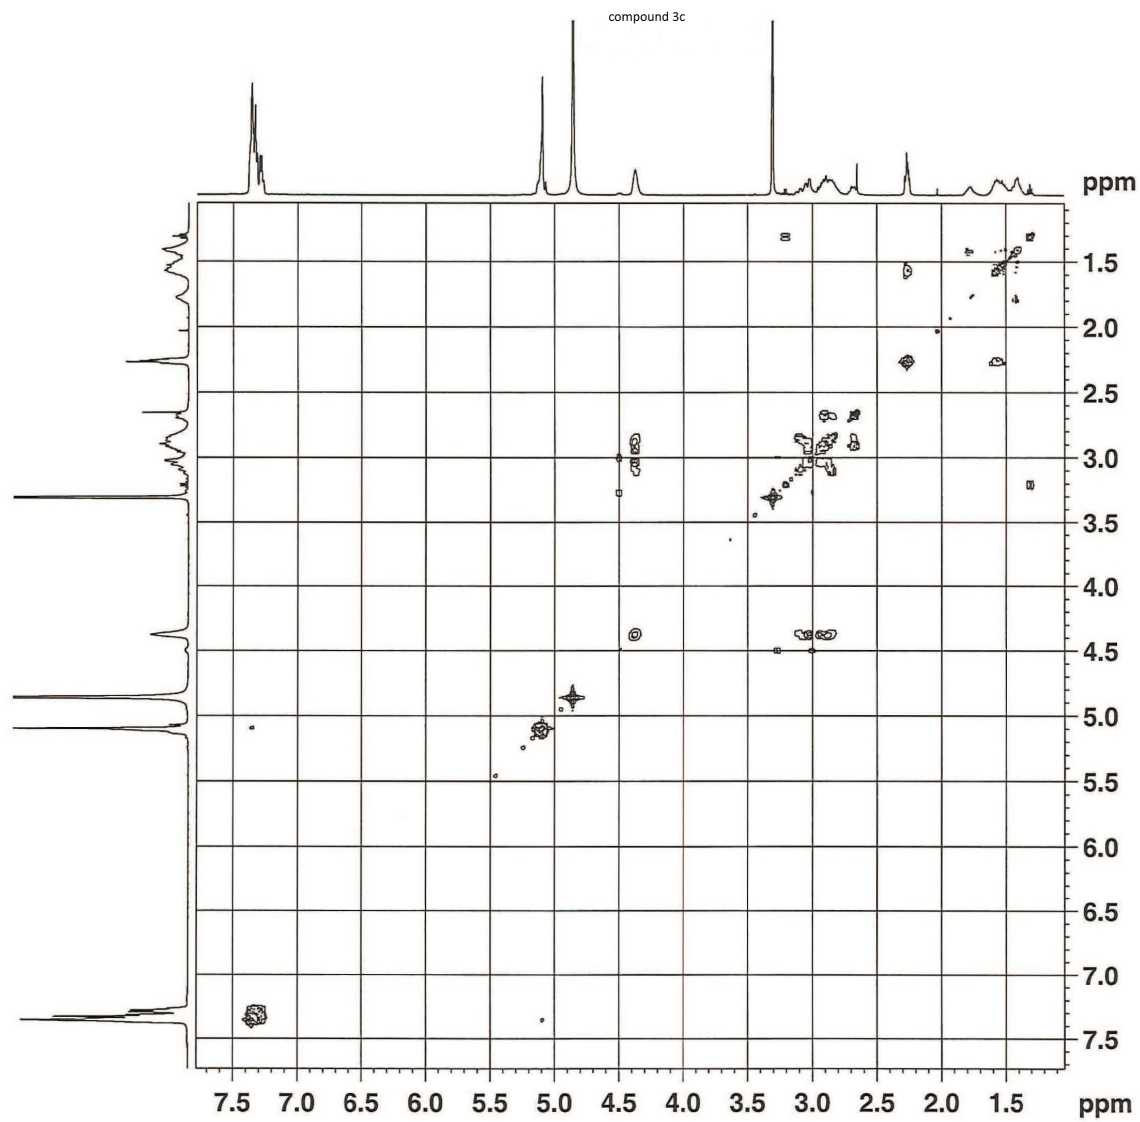

```

NAME          62155052
EXPNO         506
PROCNO        1
Date_         20140116
Time          9.13
INSTRUM       spect
PROBHD        5 mm CPDCH 13C
PULPROG       cosygpppqf
TD            2048
SOLVENT       MeOD
NS            1
DS            16
SWH           4347.826 Hz
FIDRES        2.122962 Hz
AQ            0.2355700 sec
RG            18
DW            115.000 usec
DE            6.50 usec
TE            303.0 K
DO            0.0000300 sec
D1            1.37916696 sec
D11           0.03000000 sec
D12           0.00002000 sec
D13           0.00000400 sec
D16           0.00020000 sec
IN0           0.00023000 sec

```

```

===== CHANNEL f1 =====
NUC1          1H
P0            8.90 usec
P1            8.90 usec
P17           2500.00 usec
  PL1         3.00 dB
  PL10        13.84 dB
  PL1W        15.73656750 W
  PL10W       1.29691052 W
SFO1          500.1318645 MHz

```

```

===== GRADIENT CHANNEL =====
GPNAM1        SINE.100
GPZ1          10.00 %
P16           1000.00 usec
  NDO         1
  TD          512
SFO1          500.1319 MHz
FIDRES        8.491848 Hz
SW            8.693 ppm
  F1MODE      QF
  SI          2048
SF            500.1300132 MHz
  WDW         SINE
  SSB         0
  LB          0.00 Hz
  GB          0
  PC          1.40
  SI          2048
  MC2         QF
SF            500.1300132 MHz
  WDW         SINE
  SSB         0
  LB          0.00 Hz
  GB          0

```

u-

```

NAME      62155052
EXPNO    500
PROCNO   1
Date_    20140116
Time     8.06
INSTRUM  spect
PROBHD   5 mm CPDCH 13C
PULPROG  zg30
TD       65536
SOLVENT  MeOD
NS       32
DS       2
SWH      10330.578 Hz
FIDRES   0.157632 Hz
AQ       3.1719923 sec
RG       8
DW       48.400 usec
DE       6.50 usec
TE       303.0 K
DL       1.00000000 sec
TD0      1

```

```

===== CHANNEL f1 =====
NUC1      1H
P1        8.90 usec
PL1       3.00 dB
PL1W     15.73656750 W
SFO1     500.1330885 MHz
SI        32768
SF       500.1300132 MHz
WDW       EM
SSB       0
LB        0.30 Hz
GB        0
EC        1.00

```

compound 3d

| 1  | 14454.8 | 212.254  | 1.2114 | 6.34  |
|----|---------|----------|--------|-------|
| 2  | 14454.4 | 2079.954 | 7.2398 | 8.49  |
| 3  | 14453.3 | 2081.052 | 7.2398 | 1.45  |
| 4  | 14452.9 | 2079.954 | 7.2398 | 1.45  |
| 5  | 14452.0 | 2079.954 | 7.2398 | 5.17  |
| 6  | 14451.1 | 2079.954 | 7.2398 | 2.04  |
| 7  | 14450.5 | 2079.954 | 7.2398 | 4.05  |
| 8  | 14450.4 | 2079.954 | 7.2398 | 4.05  |
| 9  | 14450.3 | 2079.954 | 7.2398 | 1.77  |
| 10 | 17925.1 | 2088.222 | 5.1709 | 0.22  |
| 11 | 18025.3 | 2088.222 | 5.1709 | 0.22  |
| 12 | 18025.3 | 2088.222 | 5.1709 | 15.05 |
| 13 | 18025.8 | 2088.222 | 5.1709 | 0.22  |
| 14 | 18029.9 | 2074.202 | 4.9973 | 1.18  |
| 15 | 18032.5 | 2420.232 | 4.8526 | 89.55 |
| 16 | 18032.5 | 2420.232 | 4.8526 | 0.22  |
| 17 | 18032.5 | 2420.232 | 4.8526 | 0.22  |
| 18 | 18126.2 | 2188.513 | 4.7309 | 0.22  |
| 19 | 20077.0 | 1571.038 | 3.4427 | 0.14  |
| 20 | 20242.2 | 1702.249 | 3.4222 | 0.10  |
| 21 | 20884.7 | 1834.214 | 3.2564 | 0.17  |
| 22 | 20885.1 | 1832.212 | 3.2564 | 0.16  |
| 23 | 20884.9 | 1834.181 | 3.2564 | 12.68 |
| 24 | 20889.8 | 1874.880 | 3.2082 | 26.64 |
| 25 | 20895.0 | 1852.289 | 3.2051 | 37.78 |
| 26 | 20895.1 | 1851.279 | 3.2089 | 39.80 |
| 27 | 20925.0 | 1848.237 | 3.2089 | 14.89 |
| 28 | 20964.5 | 1831.074 | 3.2613 | 14.29 |
| 29 | 20976.1 | 1827.423 | 3.2565 | 0.24  |
| 30 | 21037.5 | 1834.279 | 3.2279 | 8.29  |
| 31 | 21042.6 | 1827.424 | 3.2222 | 0.74  |
| 32 | 21052.8 | 1839.744 | 3.1887 | 0.74  |
| 33 | 21087.0 | 1832.464 | 3.1841 | 0.28  |
| 34 | 21129.4 | 1821.011 | 3.1532 | 0.19  |
| 35 | 21139.3 | 1840.411 | 3.1090 | 0.15  |
| 36 | 21139.4 | 1838.420 | 3.1054 | 0.44  |
| 37 | 21239.7 | 1844.401 | 3.0880 | 0.47  |
| 38 | 21239.7 | 1838.447 | 3.0835 | 0.19  |
| 39 | 21239.7 | 1838.447 | 3.0835 | 1.49  |
| 40 | 21242.1 | 1833.242 | 3.0821 | 2.02  |
| 41 | 21252.6 | 1838.422 | 3.0402 | 0.02  |
| 42 | 21477.4 | 1489.287 | 2.9759 | 0.43  |
| 43 | 21481.0 | 1479.488 | 2.9644 | 0.19  |
| 44 | 21481.0 | 1479.488 | 2.9644 | 0.19  |
| 45 | 21481.9 | 1453.328 | 2.9261 | 1.56  |
| 46 | 21525.8 | 1455.378 | 2.9261 | 2.05  |
| 47 | 21559.7 | 1446.276 | 2.9118 | 2.46  |
| 48 | 21559.4 | 1432.322 | 2.9055 | 1.77  |
| 49 | 21575.9 | 1432.322 | 2.9055 | 1.77  |
| 50 | 21575.9 | 1432.322 | 2.9055 | 1.94  |
| 51 | 21594.0 | 1434.788 | 2.8984 | 1.64  |
| 52 | 21644.3 | 1387.488 | 2.8791 | 1.10  |
| 53 | 21688.4 | 1332.788 | 2.8788 | 1.04  |
| 54 | 21702.3 | 1334.444 | 2.8703 | 1.06  |
| 55 | 21731.2 | 1326.299 | 2.8519 | 1.99  |
| 56 | 21732.0 | 1318.664 | 2.8501 | 0.41  |
| 57 | 21745.0 | 1323.794 | 2.8503 | 5.18  |
| 58 | 21755.0 | 1327.844 | 2.8379 | 4.17  |
| 59 | 21755.0 | 1327.844 | 2.8379 | 1.17  |
| 60 | 21774.9 | 1323.792 | 2.8425 | 2.15  |
| 61 | 21792.8 | 1314.314 | 2.8266 | 0.50  |
| 62 | 21794.4 | 1305.201 | 2.8233 | 0.10  |
| 63 | 21794.4 | 1305.201 | 2.8233 | 0.10  |
| 64 | 21813.8 | 1290.261 | 2.8081 | 0.79  |
| 65 | 21813.8 | 1290.261 | 2.8081 | 0.79  |
| 66 | 21813.8 | 1290.261 | 2.8081 | 3.06  |
| 67 | 21813.8 | 1290.261 | 2.8081 | 0.81  |
| 68 | 21813.8 | 1290.261 | 2.8081 | 1.87  |
| 69 | 21813.8 | 1290.261 | 2.8081 | 1.87  |
| 70 | 21813.8 | 1290.261 | 2.8081 | 1.87  |
| 71 | 21813.8 | 1290.261 | 2.8081 | 1.87  |
| 72 | 21813.8 | 1290.261 | 2.8081 | 1.87  |
| 73 | 21813.8 | 1290.261 | 2.8081 | 1.87  |
| 74 | 21813.8 | 1290.261 | 2.8081 | 1.87  |
| 75 | 21813.8 | 1290.261 | 2.8081 | 1.87  |
| 76 | 21813.8 | 1290.261 | 2.8081 | 1.87  |
| 77 | 21813.8 | 1290.261 | 2.8081 | 1.87  |
| 78 | 21813.8 | 1290.261 | 2.8081 | 1.87  |
| 79 | 21813.8 | 1290.261 | 2.8081 | 1.87  |
| 80 | 21813.8 | 1290.261 | 2.8081 | 1.87  |
| 81 | 21813.8 | 1290.261 | 2.8081 | 1.87  |
| 82 | 21813.8 | 1290.261 | 2.8081 | 1.87  |
| 83 | 21813.8 | 1290.261 | 2.8081 | 1.87  |
| 84 | 21813.8 | 1290.261 | 2.8081 | 1.87  |
| 85 | 21813.8 | 1290.261 | 2.8081 | 1.87  |
| 86 | 21813.8 | 1290.261 | 2.8081 | 1.87  |
| 87 | 21813.8 | 1290.261 | 2.8081 | 1.87  |
| 88 | 21813.8 | 1290.261 | 2.8081 | 1.87  |
| 89 | 21813.8 | 1290.261 | 2.8081 | 1.87  |
| 90 | 21813.8 | 1290.261 | 2.8081 | 1.87  |
| 91 | 21813.8 | 1290.261 | 2.8081 | 1.87  |
| 92 | 21813.8 | 1290.261 | 2.8081 | 1.87  |
| 93 | 21813.8 | 1290.261 | 2.8081 | 1.87  |
| 94 | 21813.8 | 1290.261 | 2.8081 | 1.87  |
| 95 | 21813.8 | 1290.261 | 2.8081 | 1.87  |
| 96 | 21813.8 | 1290.261 | 2.8081 | 1.87  |

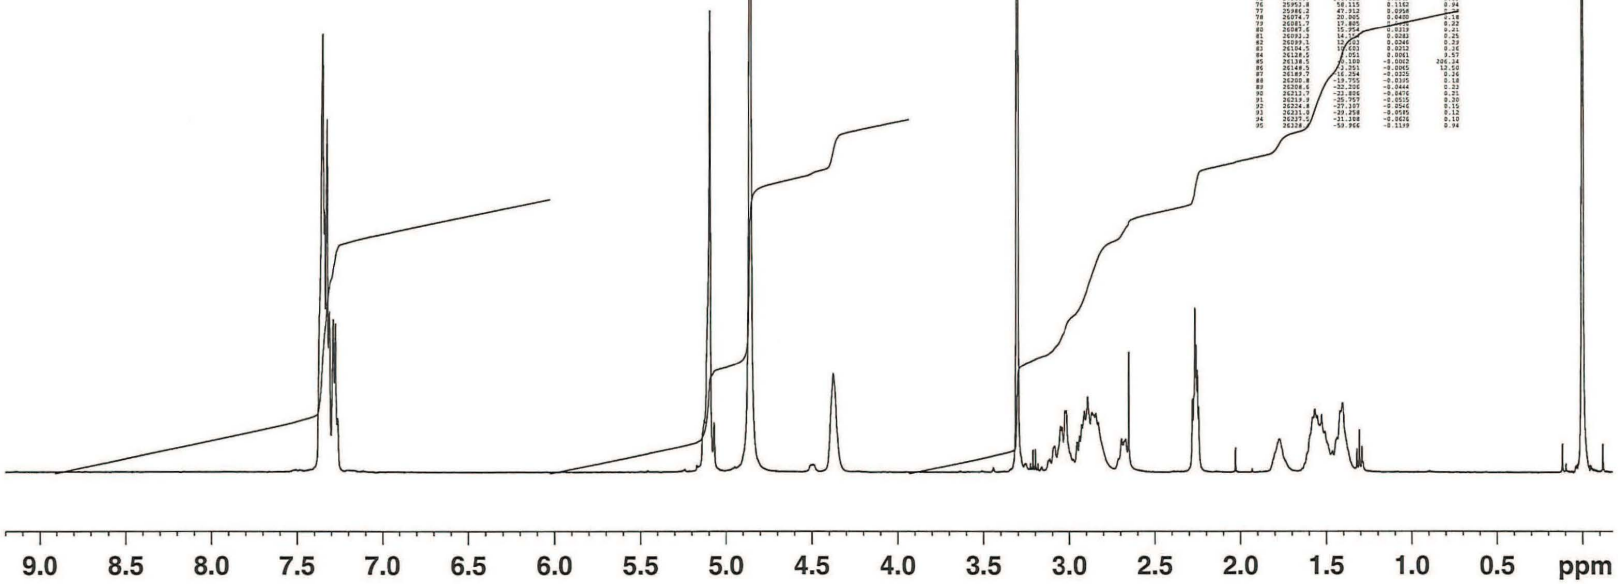

2

NAME 62155052  
EXPNO 501  
PROCNO 1  
Date\_ 20140116  
Time 11.07  
INSTRUM spect  
PROBHD 5 mm CPDCH 13C  
PULPROG zgpg  
TD 65536  
SOLVENT MeOD  
NS 1024  
DS 4  
SWH 30864.197 Hz  
FIDRES 0.470950 Hz  
AQ 1.0617332 sec  
RG 645  
DW 16.200 usec  
DE 20.00 usec  
TE 303.0 K  
DL 4.0000000 sec  
D11 0.03000000 sec  
TDD 1  
  
===== CHANNEL f1 =====  
NUC1 13C  
P1 9.70 usec  
PL1 4.00 dB  
PL1W 34.40000153 W  
SFO1 125.7703643 MHz  
  
===== CHANNEL f2 =====  
CPDPRG2 waltz16  
NUC2 1H  
PCPD2 80.00 usec  
PL2 3.00 dB  
PL12 22.07 dB  
PL13 25.00 dB  
PL2W 15.73656750 W  
PL12W 0.19494408 W  
PL13W 0.0929103 W  
SFO2 500.1320005 MHz  
SI 65536  
SF 125.7576066 MHz  
WDW EM  
SSB 0  
LB 1.00 Hz  
GB 0  
PC 1.40

compound 3d

EM/CPD/Topspin, UCDM=FastTrack, NAME=62155052, EXPNO=501, PROCNO=1  
F1=234.160ppm, F2=21.266ppm, MI=0.00cm, MAXF=10000.00cm, PC=1.400

| #  | NAME | F1 (ppm) | F2 (ppm)  | INTENSITY |
|----|------|----------|-----------|-----------|
| 1  |      | 12424.5  | 22338.773 | 177.4526  |
| 2  |      | 13201.7  | 21925.160 | 174.2446  |
| 3  |      | 17524.5  | 19235.523 | 198.2524  |
| 4  |      | 17544.2  | 19271.173 | 158.4570  |
| 5  |      | 22575.1  | 17527.887 | 139.6169  |
| 6  |      | 22940.9  | 17385.612 | 138.2470  |
| 7  |      | 23885.2  | 16940.883 | 134.2106  |
| 8  |      | 24107.0  | 16836.416 | 133.8739  |
| 9  |      | 24650.4  | 16273.419 | 131.7886  |
| 10 |      | 25268.5  | 16280.395 | 129.5301  |
| 11 |      | 25393.8  | 16230.415 | 129.0611  |
| 12 |      | 25417.9  | 16219.034 | 128.9706  |
| 13 |      | 25429.9  | 16212.387 | 128.9623  |
| 14 |      | 41659.7  | 8549.966  | 68.1467   |
| 15 |      | 41756.5  | 8524.293  | 67.7863   |
| 16 |      | 44845.9  | 7069.439  | 56.2148   |
| 17 |      | 44955.2  | 7077.603  | 56.8026   |
| 18 |      | 44985.8  | 7003.542  | 55.4908   |
| 19 |      | 45111.2  | 6897.365  | 54.8465   |
| 20 |      | 45233.5  | 6246.380  | 49.6700   |
| 21 |      | 44624.2  | 6231.356  | 49.5523   |
| 22 |      | 44639.1  | 6234.939  | 49.4995   |
| 23 |      | 44645.0  | 6222.134  | 49.4772   |
| 24 |      | 44647.1  | 6231.153  | 49.4634   |
| 25 |      | 44649.7  | 6210.489  | 49.2846   |
| 26 |      | 44684.3  | 6203.648  | 49.2302   |
| 27 |      | 44690.0  | 6200.322  | 49.2086   |
| 28 |      | 44692.1  | 6199.938  | 49.2007   |
| 29 |      | 44715.1  | 6189.110  | 49.2146   |
| 30 |      | 44729.9  | 6182.156  | 49.1993   |
| 31 |      | 44731.9  | 6180.729  | 49.1465   |
| 32 |      | 44736.0  | 6179.301  | 49.1366   |
| 33 |      | 44738.0  | 6178.320  | 49.1288   |
| 34 |      | 44740.0  | 6177.377  | 49.1213   |
| 35 |      | 44742.1  | 6176.396  | 49.1135   |
| 36 |      | 44744.2  | 6175.460  | 49.1059   |
| 37 |      | 44746.2  | 6174.460  | 49.0981   |
| 38 |      | 44748.4  | 6173.460  | 49.0902   |
| 39 |      | 44750.7  | 6172.460  | 49.0841   |
| 40 |      | 44774.7  | 6161.094  | 48.9915   |
| 41 |      | 44778.8  | 6159.113  | 48.9808   |
| 42 |      | 44781.0  | 6158.113  | 48.9808   |
| 43 |      | 44783.0  | 6157.130  | 48.9603   |
| 44 |      | 44785.0  | 6156.187  | 48.9608   |
| 45 |      | 44787.2  | 6155.181  | 48.9448   |
| 46 |      | 44809.0  | 6144.272  | 48.9708   |
| 47 |      | 44822.7  | 6138.455  | 48.8118   |
| 48 |      | 44824.8  | 6137.462  | 48.8039   |
| 49 |      | 44826.9  | 6136.481  | 48.7961   |
| 50 |      | 44829.0  | 6135.500  | 48.7883   |
| 51 |      | 44831.0  | 6134.544  | 48.7807   |
| 52 |      | 44833.1  | 6133.563  | 48.7729   |
| 53 |      | 44835.1  | 6132.620  | 48.7654   |
| 54 |      | 44837.2  | 6131.639  | 48.7576   |
| 55 |      | 44839.2  | 6130.658  | 48.7498   |
| 56 |      | 44841.3  | 6129.678  | 48.7420   |
| 57 |      | 44843.3  | 6128.735  | 48.7342   |
| 58 |      | 47042.9  | 6204.793  | 67.9872   |
| 59 |      | 47164.1  | 5976.743  | 47.5259   |
| 60 |      | 47302.8  | 5924.396  | 47.5139   |
| 61 |      | 48806.3  | 5204.290  | 41.1835   |
| 62 |      | 48952.3  | 5088.417  | 40.4633   |
| 63 |      | 49280.0  | 4981.208  | 39.6096   |
| 64 |      | 50138.4  | 4821.530  | 38.6450   |
| 65 |      | 50555.8  | 4780.326  | 34.8315   |
| 66 |      | 50602.8  | 4720.316  | 33.2509   |
| 67 |      | 50725.4  | 4700.495  | 34.1967   |
| 68 |      | 50810.5  | 4520.972  | 33.8079   |
| 69 |      | 50845.4  | 4243.942  | 33.7470   |
| 70 |      | 52668.7  | 3425.353  | 27.2834   |
| 71 |      | 52881.4  | 3426.367  | 27.2458   |
| 72 |      | 52843.4  | 2526.915  | 25.8906   |
| 73 |      | 57385.3  | 1163.987  | 9.2558    |
| 74 |      | 59897.4  | -9.226    | -0.0018   |
| 75 |      | 59911.7  | -25.831   | -0.2054   |

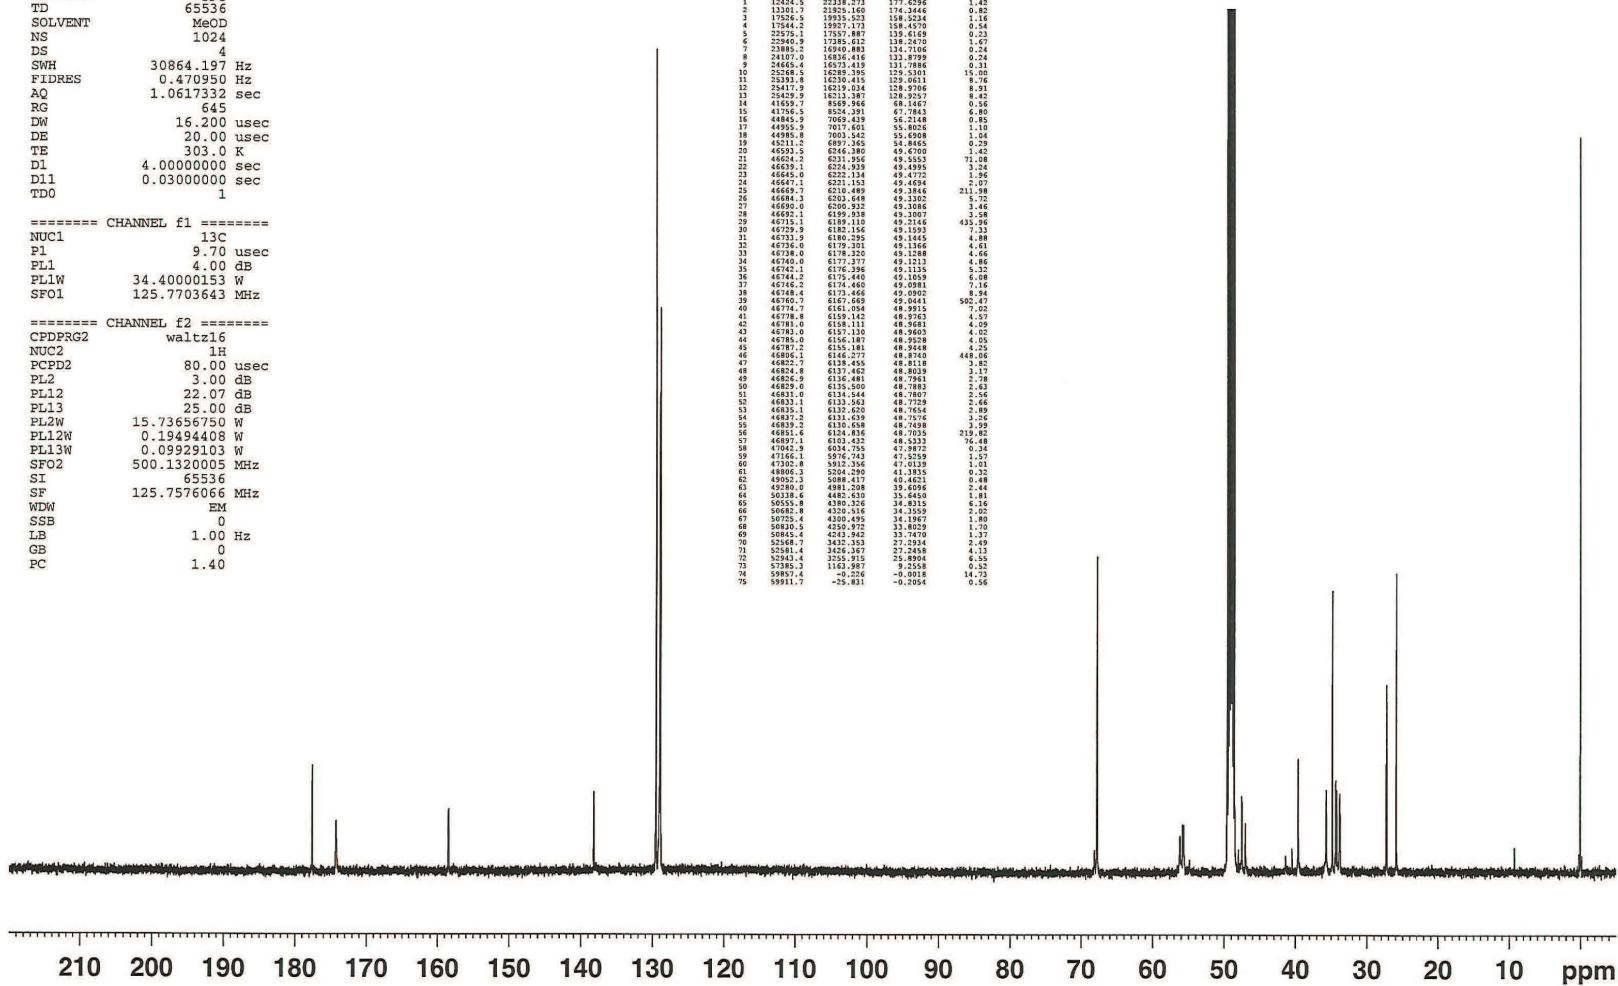

L

DI=cpt/topspin, USER=SamTrack, NAME=62155052, EXPNO=502, PROCNO=1  
 F1=215.778ppm, F2=16.883ppm, MI=0.50cm, MAXI=10000.00cm, PC=1.400

CH,CH3-signals positive, CH2-signals negative

| #  | ADDRESS | FREQUENCY [PPM] | INTENSITY |
|----|---------|-----------------|-----------|
| 1  | 24992.0 | 16288.842       | 129.5257  |
| 2  | 25123.7 | 16229.019       | 129.0500  |
| 3  | 25146.6 | 16218.644       | 128.9678  |
| 4  | 25159.2 | 16212.897       | 128.9218  |
| 5  | 25178.8 | 16204.056       | 128.8815  |
| 6  | 42089.8 | 8524.238        | 67.7830   |
| 7  | 45399.7 | 7066.486        | 56.1934   |
| 8  | 45442.2 | 7051.769        | 55.8767   |
| 9  | 47105.7 | 6246.355        | 49.6698   |
| 10 | 47152.9 | 6234.913        | 49.4993   |
| 11 | 47200.1 | 6203.459        | 49.3287   |
| 12 | 47247.4 | 6161.980        | 49.1579   |
| 13 | 47294.8 | 6160.463        | 48.9868   |
| 14 | 47698.9 | 5976.997        | 47.5276   |
| 15 | 47839.4 | 5913.148        | 47.0202   |
| 16 | 49892.2 | 4980.819        | 39.6073   |
| 17 | 50989.7 | 4462.504        | 35.6440   |
| 18 | 51214.3 | 4380.490        | 34.8328   |
| 19 | 51345.7 | 4330.809        | 34.3582   |
| 20 | 51389.4 | 4300.973        | 34.2005   |
| 21 | 51499.4 | 4251.035        | 33.8034   |
| 22 | 53301.7 | 3432.341        | 27.2949   |
| 23 | 53315.1 | 3426.442        | 27.2464   |
| 24 | 53889.1 | 3256.619        | 26.8960   |
| 25 | 60860.2 | 0.013           | 0.0001    |
| 26 | 60916.4 | -25.529         | -0.2030   |

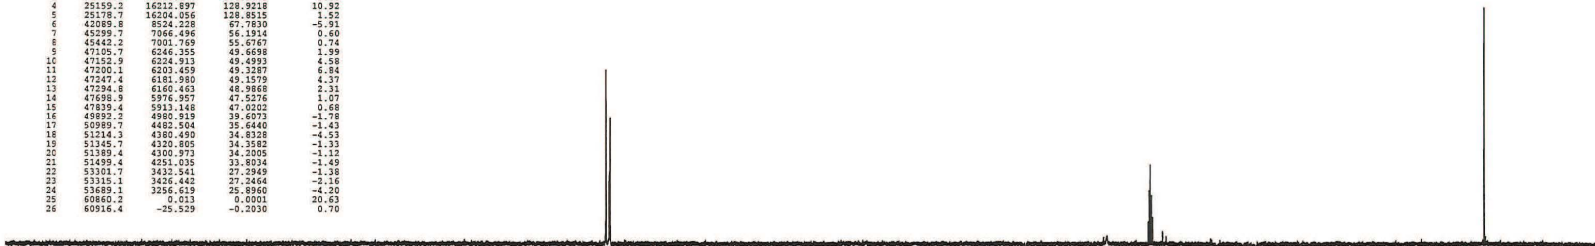

DI=cpt/topspin, USER=SamTrack, NAME=62155052, EXPNO=503, PROCNO=1  
 F1=215.778ppm, F2=16.883ppm, MI=0.50cm, MAXI=10000.00cm, PC=1.400

CH-signals

| #  | ADDRESS | FREQUENCY [PPM] | INTENSITY |
|----|---------|-----------------|-----------|
| 1  | 24992.0 | 16288.842       | 129.5257  |
| 2  | 25123.8 | 16228.994       | 129.0498  |
| 3  | 25146.5 | 16218.682       | 128.9678  |
| 4  | 25159.2 | 16212.897       | 128.9218  |
| 5  | 25178.8 | 16204.056       | 128.8815  |
| 6  | 45408.3 | 7017.174        | 55.7992   |
| 7  | 47105.5 | 6246.405        | 49.6702   |
| 8  | 47152.8 | 6234.926        | 49.4994   |
| 9  | 47200.1 | 6203.484        | 49.3289   |
| 10 | 47247.3 | 6182.018        | 49.1592   |
| 11 | 47294.7 | 6160.500        | 48.9871   |
| 12 | 47699.4 | 5976.718        | 47.5257   |
| 13 | 47840.9 | 5912.481        | 47.0149   |
| 14 | 60860.2 | -0.013          | -0.0001   |

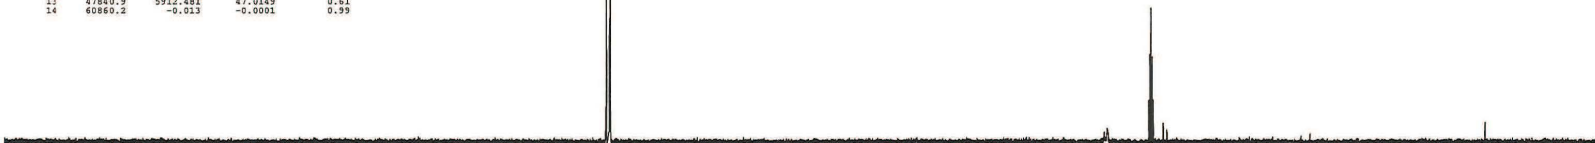

compound 3d

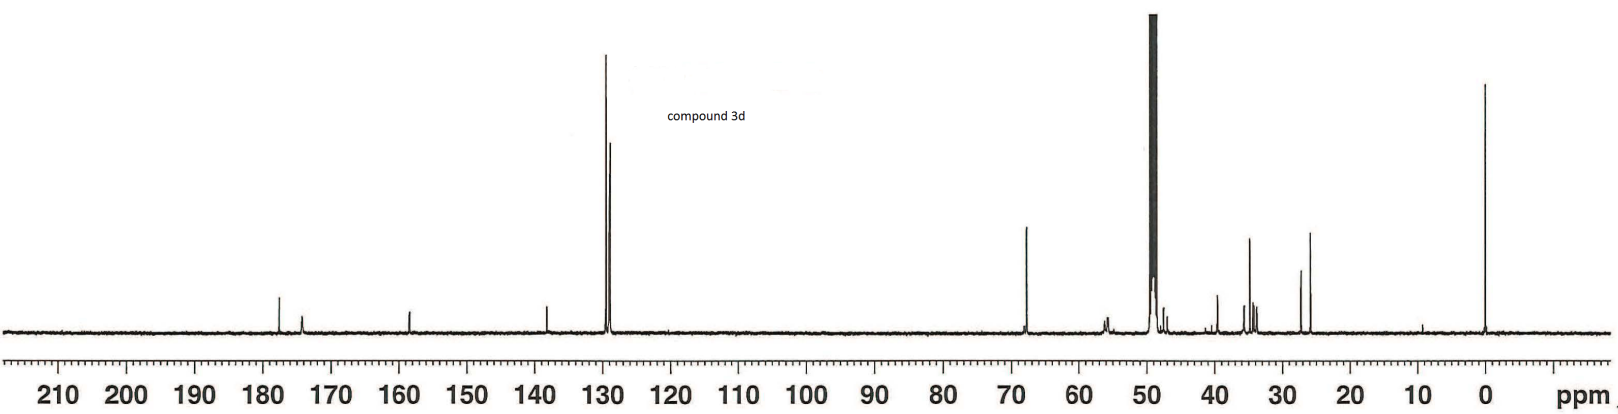

W

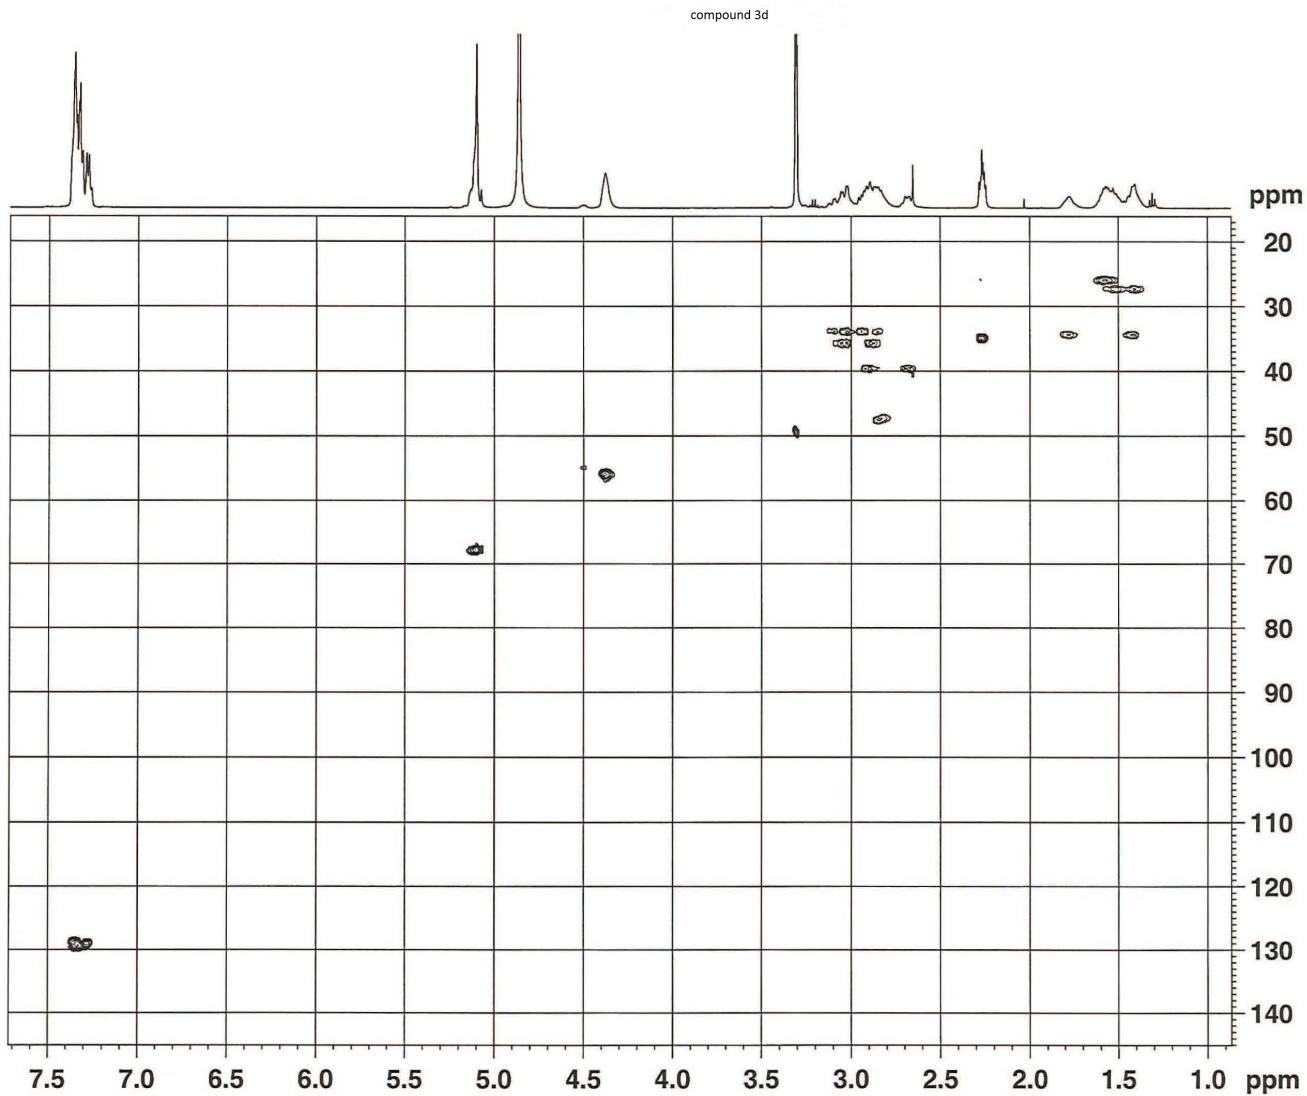

```

NAME          62155052
EXPNO         1
PROCNO        1
Date_         20140116
Time          8.43
INSTRUM       spect
PROBHD        5 mm CPDCH 13C
PULPROG       hsqcetgpsisp2.2
TD            7948
SOLVENT       MeOD
NS            2
DS            16
SWH           4347.826 Hz
FIDRES        2.122952 Hz
AQ            0.2355700 sec
RG            2050
DW            115.000 usec
DE            6.50 usec
TE            303.0 K
CNS22         145.0000000
CNS17         -0.5000000
DO            0.00000300 sec
DL            1.39227498 sec
D4            0.00175414 sec
D11           0.03000000 sec
D16           0.00200000 sec
D24           0.00110000 sec
IN0           0.00002090 sec

***** CHANNEL f1 *****
NUC1           1H
P1             8.90 usec
P2            17.80 usec
P28           1000.00 usec
PL1            3.00 dB
PL1W          15.7365750 W
SFO1          500.1318645 MHz

***** CHANNEL f2 *****
CPDPRG2       garp
NUC2          13C
P3             9.70 usec
P14           500.00 usec
P24           2000.00 usec
PCPD2         65.00 usec
PL0            120.00 dB
PL2            4.00 dB
PL12           20.52 dB
PL0W           0.00000000 W
PL2W           34.40000153 W
PL12W          0.7658159 W
SFO2          125.7678496 MHz
SP3            12.42 dB
SP7            12.42 dB
SPNAM3        Crp60,0.5,20.1
SPNAM7        Crp60comp.4
SFOAL3         0.500
SFOAL7         0.500
SPOFFS3        0.00 Hz
SPOFFS7        0.00 Hz

***** GRADIENT CHANNEL *****
GPNAM1        SINE.100
GPNAM2        SINE.100
GPNAM3        SINE.100
GPNAM4        SINE.100
GPZ1           80.00 %
GPZ2           20.10 %
GPZ3           11.00 %
GPZ4           -5.00 %
P16           1000.00 usec
P19           600.00 usec
ND0            2
TD            256
SFO1          125.7678 MHz
FIDRES         93.342123 Hz
SW            190.000 ppm
FIRNODE       Echo-Antiecho
SI            2048
SF            500.1300132 MHz
WDW           QSINE
SSB            2
LB            0.00 Hz
GB            0
PC            1.40
SI            1024
MC2           echo-antiecho
SF            125.7576066 MHz
WDW           QSINE
SSB            2
LB            0.00 Hz
GB            0

```

*k*

compound 3d

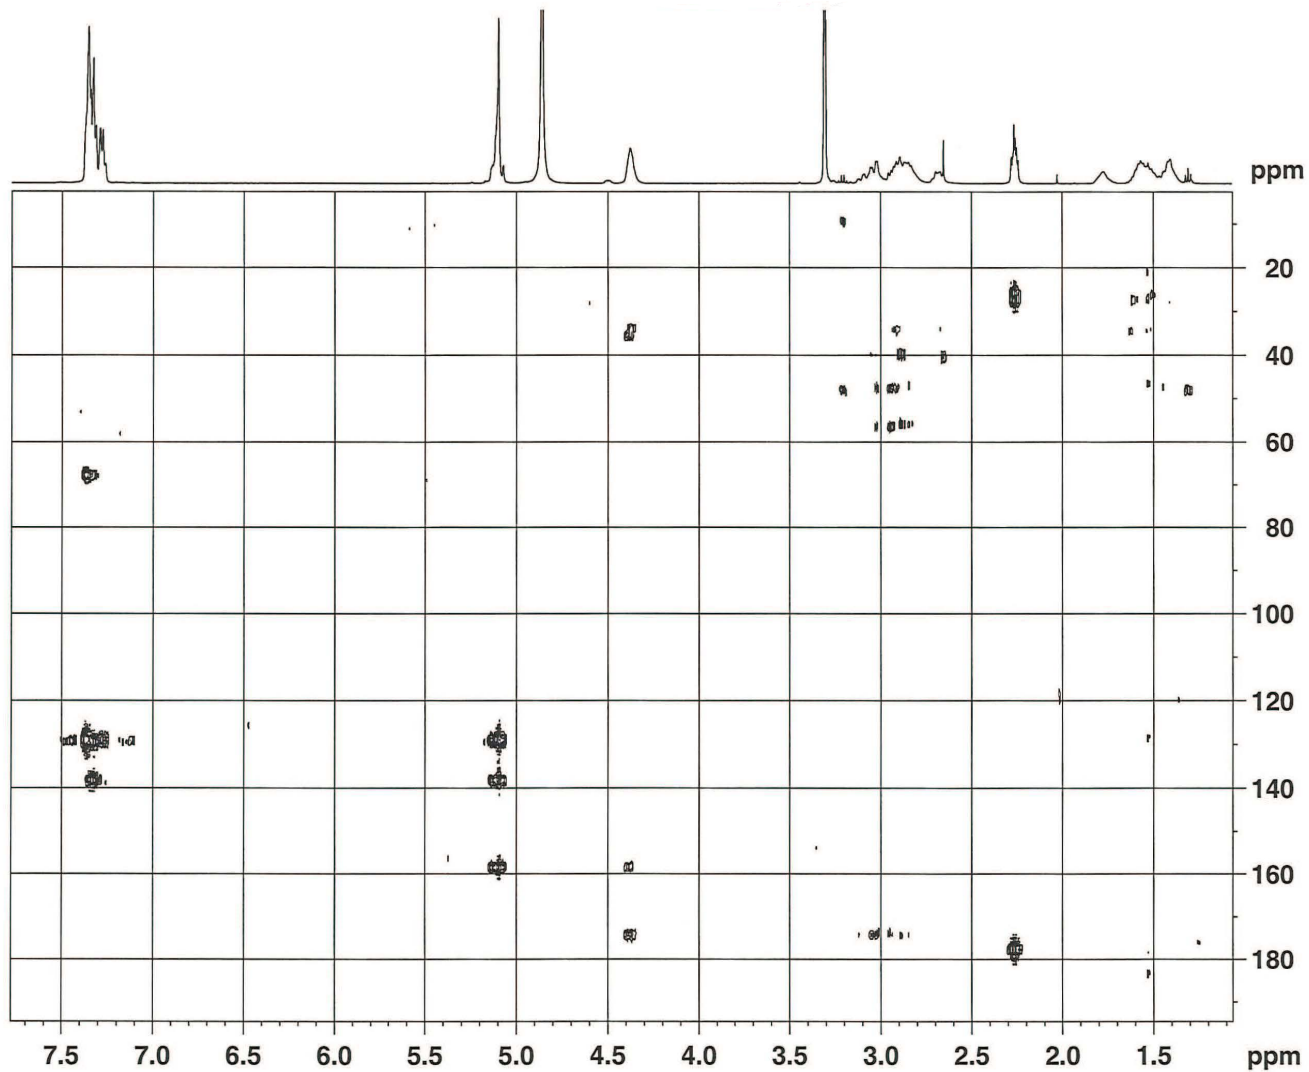

```
NAME 62155052
EXPNO 505
PROCNO 1
Date_ 20140116
Time 11.08
INSTRUM spect
PROBHD 5 mm CPDCH 13C
FULPROG hmbcetsp12nd
TD 2048
SOLVENT MeOD
NS 16
DS 16
SWH 4347.826 Hz
FIDRES 2.122962 Hz
AQ 0.2355700 sec
RG 2050
DW 115.000 usec
DE 6.50 usec
TE 303.0 K
CNS*6 125.0000000
CNS*7 160.0000000
CNS*13 10.0000000
CNS*30 0.5981150
D0 0.00000300 sec
D1 1.42176604 sec
D5 0.05000000 sec
D16 0.00020000 sec
IN0 0.00001790 sec

===== CHANNEL f1 =====
NUC1 1H
P1 8.90 usec
P2 17.80 usec
PL1 3.00 dB
PL1W 15.73656750 W
SFO1 500.1318645 MHz

===== CHANNEL f2 =====
NUC2 13C
P3 9.70 usec
P24 2000.00 usec
PL2 4.00 dB
PL2W 34.40000153 W
SFO2 125.7703443 MHz
SP7 12.42 dB
SPNAM7 Crp60comp.4
SFOAL7 0.500
SPOFFS7 0.00 Hz

===== GRADIENT CHANNEL =====
GPNAM1 SINE.100
GPNAM3 SINE.100
GPNAM4 SINE.100
GPNAM5 SINE.100
GPZ1 80.00 %
GPZ3 15.00 %
GPZ4 -10.00 %
GPZ5 -5.00 %
P16 NDO 1000.00 usec
TD 2
SFO1 125.7703 MHz
FIDRES 109.113174 Hz
SW 222.095 ppm
FnMODE Echo-Antiecho
SI 2048
SF 500.1300132 MHz
WDW SINE
SSB 0
LB 0.00 Hz
GB 0
PC 1.40
SI 1024
MC2 echo-antiecho
SF 125.7576066 MHz
WDW SINE
SSB 0
LB 0.00 Hz
GB 0
```

6

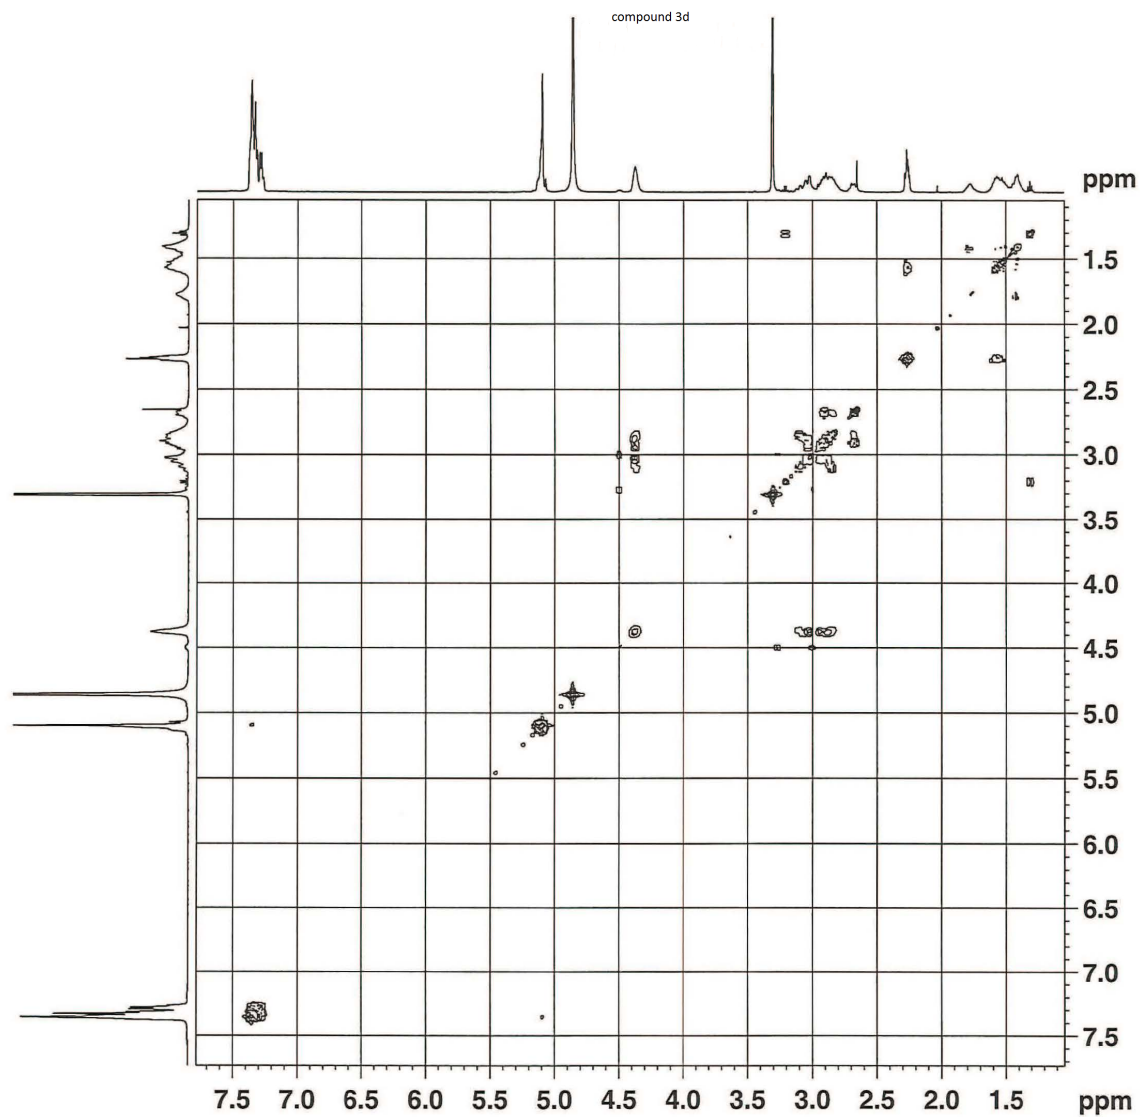

```

NAME          62155052
EXPNO         506
PROCNO        1
Date_         20140116
Time          9.13
INSTRUM       spect
PROBHD        5 mm CPDCH 13C
PULPROG       cosygpppqf
TD            2048
SOLVENT       MeOD
NS            1
DS            16
SWH           4347.826 Hz
FIDRES        2.122962 Hz
AQ            0.2355700 sec
RG            18
DW            115.000 usec
DE            6.50 usec
TE            303.0 K
DO            0.0000300 sec
D1            1.37916696 sec
D11           0.03000000 sec
D12           0.00002000 sec
D13           0.00000400 sec
D16           0.00020000 sec
IN0           0.00023000 sec

```

```

===== CHANNEL f1 =====
NUC1          1H
P0            8.90 usec
P1            8.90 usec
P17           2500.00 usec
  PL1          3.00 dB
  PL10         13.84 dB
  PL1W         15.73656750 W
  PL10W        1.29691052 W
SFO1          500.1318645 MHz

```

```

===== GRADIENT CHANNEL =====
GPNAM1        SINE.100
GPZ1          10.00 %
P16           1000.00 usec
  NDO          1
  TD           512
SFO1          500.1319 MHz
FIDRES        8.491848 Hz
SW            8.693 ppm
  F1MODE       QF
  SI           2048
SF            500.1300132 MHz
  WDW          SINE
  SSB          0
  LB           0.00 Hz
  GB           0
  PC           1.40
  SI           2048
  MC2          QF
SF            500.1300132 MHz
  WDW          SINE
  SSB          0
  LB           0.00 Hz
  GB           0

```

u-



Current Data Parameters  
 NAME 68952051  
 EXPNO 500  
 PROCNO 1

F2 - Acquisition Parameters  
 Date\_ 20141010  
 Time 14.51  
 INSTRUM spect  
 PROBHD 5 mm CPDCH 13C  
 PULPROG zg30  
 TD 65536  
 SOLVENT MeOD  
 NS 32  
 DS 2  
 SWH 10330.578 Hz  
 FIDRES 0.157632 Hz  
 AQ 3.1719425 sec  
 RG 10  
 DW 48.400 usec  
 DE 10.00 usec  
 TE 303.0 K  
 D1 1.00000000 sec  
 TD0 1

==== CHANNEL f1 =====  
 SFO1 500.1330885 MHz  
 NUC1 1H  
 P1 9.00 usec  
 PLW1 15.73700047 W

F2 - Processing parameters  
 SI 32768  
 SF 500.1300118 MHz  
 WDW EM  
 SSB 0  
 LB 0.30 Hz  
 GB 0  
 PC 1.00

NMR spectra for compound 3e

DOIC:\Bruker\TopSpin1.2\data\5aeTrack\mr\_USER\hwg0081\_NMR\68952051.EXPNO=500, PROCNO=1  
 F1=4.480000, F2=4.174000, M1=1.000000, Q1=0.000000, Q2=0.000000

| #  | ACQTIME | Hz       | PPM     | INTEGRITY |
|----|---------|----------|---------|-----------|
| 1  | 14443.3 | 1679.708 | 7.3650  | 5.07      |
| 2  | 14477.1 | 1679.966 | 7.3539  | 14.23     |
| 3  | 14489.1 | 1679.205 | 7.3459  | 12.84     |
| 4  | 14489.1 | 1674.195 | 7.3463  | 12.60     |
| 5  | 14505.5 | 1679.554 | 7.3390  | 7.91      |
| 6  | 14516.6 | 1665.453 | 7.3290  | 11.09     |
| 7  | 14523.3 | 1665.352 | 7.3222  | 9.90      |
| 8  | 14541.0 | 1657.751 | 7.3136  | 5.60      |
| 9  | 14575.9 | 1646.748 | 7.2916  | 4.90      |
| 10 | 14597.3 | 1639.996 | 7.2781  | 4.75      |
| 11 | 14638.0 | 1628.894 | 7.2639  | 1.69      |
| 12 | 17981.2 | 2573.169 | 5.1450  | 1.54      |
| 13 | 17995.7 | 2568.818 | 5.1329  | 1.76      |
| 14 | 18020.1 | 2560.916 | 5.1205  | 4.99      |
| 15 | 18034.4 | 2556.415 | 5.1113  | 5.38      |
| 16 | 18056.7 | 2549.363 | 5.0974  | 11.91     |
| 17 | 18062.9 | 2548.809 | 5.0953  | 1.76      |
| 18 | 18427.6 | 2432.432 | 4.8636  | 80.05     |
| 19 | 19322.3 | 2133.370 | 4.3816  | 3.58      |
| 20 | 19228.9 | 2179.817 | 4.3585  | 1.40      |
| 21 | 20874.8 | 1650.912 | 3.3210  | 1.11      |
| 22 | 20889.7 | 1656.231 | 3.3116  | 31.11     |
| 23 | 20884.6 | 1654.680 | 3.3085  | 60.31     |
| 24 | 20899.7 | 1653.080 | 3.3053  | 84.63     |
| 25 | 20904.9 | 1651.429 | 3.3020  | 59.88     |
| 26 | 20910.0 | 1649.829 | 3.2988  | 31.25     |
| 27 | 21248.1 | 1543.251 | 3.0857  | 1.38      |
| 28 | 21285.5 | 1531.448 | 3.0621  | 1.28      |
| 29 | 21279.5 | 1527.047 | 3.0513  | 3.39      |
| 30 | 21311.7 | 1521.196 | 3.0408  | 1.35      |
| 31 | 21347.2 | 1511.993 | 3.0230  | 1.83      |
| 32 | 21371.4 | 1508.792 | 3.0168  | 1.82      |
| 33 | 21499.4 | 1464.031 | 2.9273  | 1.44      |
| 34 | 21517.4 | 1459.329 | 2.9159  | 1.83      |
| 35 | 21541.3 | 1450.377 | 2.8996  | 2.67      |
| 36 | 21548.0 | 1447.926 | 2.8944  | 2.26      |
| 37 | 21598.5 | 1433.723 | 2.8667  | 2.59      |
| 38 | 21613.9 | 1427.951 | 2.8501  | 2.72      |
| 39 | 21618.7 | 1419.769 | 2.8388  | 2.61      |
| 40 | 21665.0 | 1411.517 | 2.8223  | 1.93      |
| 41 | 21850.9 | 1353.202 | 2.7057  | 1.69      |
| 42 | 21865.5 | 1348.601 | 2.6965  | 1.13      |
| 43 | 21876.0 | 1345.300 | 2.6899  | 1.27      |
| 44 | 21881.5 | 1340.398 | 2.6801  | 1.50      |
| 45 | 22510.5 | 1138.946 | 2.2773  | 3.89      |
| 46 | 22516.7 | 1136.996 | 2.2734  | 3.70      |
| 47 | 22554.0 | 1131.544 | 2.2625  | 7.76      |
| 48 | 22562.0 | 1129.974 | 2.2586  | 6.99      |
| 49 | 22577.6 | 1124.092 | 2.2476  | 4.37      |
| 50 | 22581.8 | 1122.142 | 2.2437  | 3.69      |
| 51 | 23350.5 | 880.429  | 1.7604  | 1.11      |
| 52 | 23362.9 | 876.928  | 1.7526  | 1.12      |
| 53 | 23375.6 | 872.527  | 1.7446  | 1.09      |
| 54 | 23625.5 | 799.207  | 1.8902  | 2.84      |
| 55 | 23637.8 | 789.855  | 1.8795  | 3.99      |
| 56 | 23659.5 | 783.004  | 1.8656  | 3.02      |
| 57 | 23809.1 | 735.841  | 1.4713  | 1.21      |
| 58 | 23850.5 | 722.788  | 1.4452  | 1.42      |
| 59 | 23971.7 | 716.536  | 1.4287  | 1.36      |
| 60 | 23990.7 | 710.335  | 1.4199  | 1.46      |
| 61 | 23991.4 | 709.314  | 1.4139  | 1.28      |
| 62 | 23994.4 | 701.382  | 1.4024  | 1.60      |
| 63 | 23992.9 | 696.911  | 1.3933  | 1.42      |
| 64 | 23947.9 | 692.080  | 1.3838  | 1.89      |
| 65 | 24009.2 | 687.218  | 1.3741  | 15.00     |
| 66 | 23958.8 | 58.115   | 0.1162  | 2.54      |
| 67 | 26131.8 | 2.952    | -0.0059 | 24.32     |
| 68 | 26141.7 | -0.150   | -0.0053 | 540.18    |
| 69 | 26131.8 | 3.353    | -0.0067 | 75.21     |
| 70 | 26333.5 | -60.016  | -0.1200 | 2.53      |

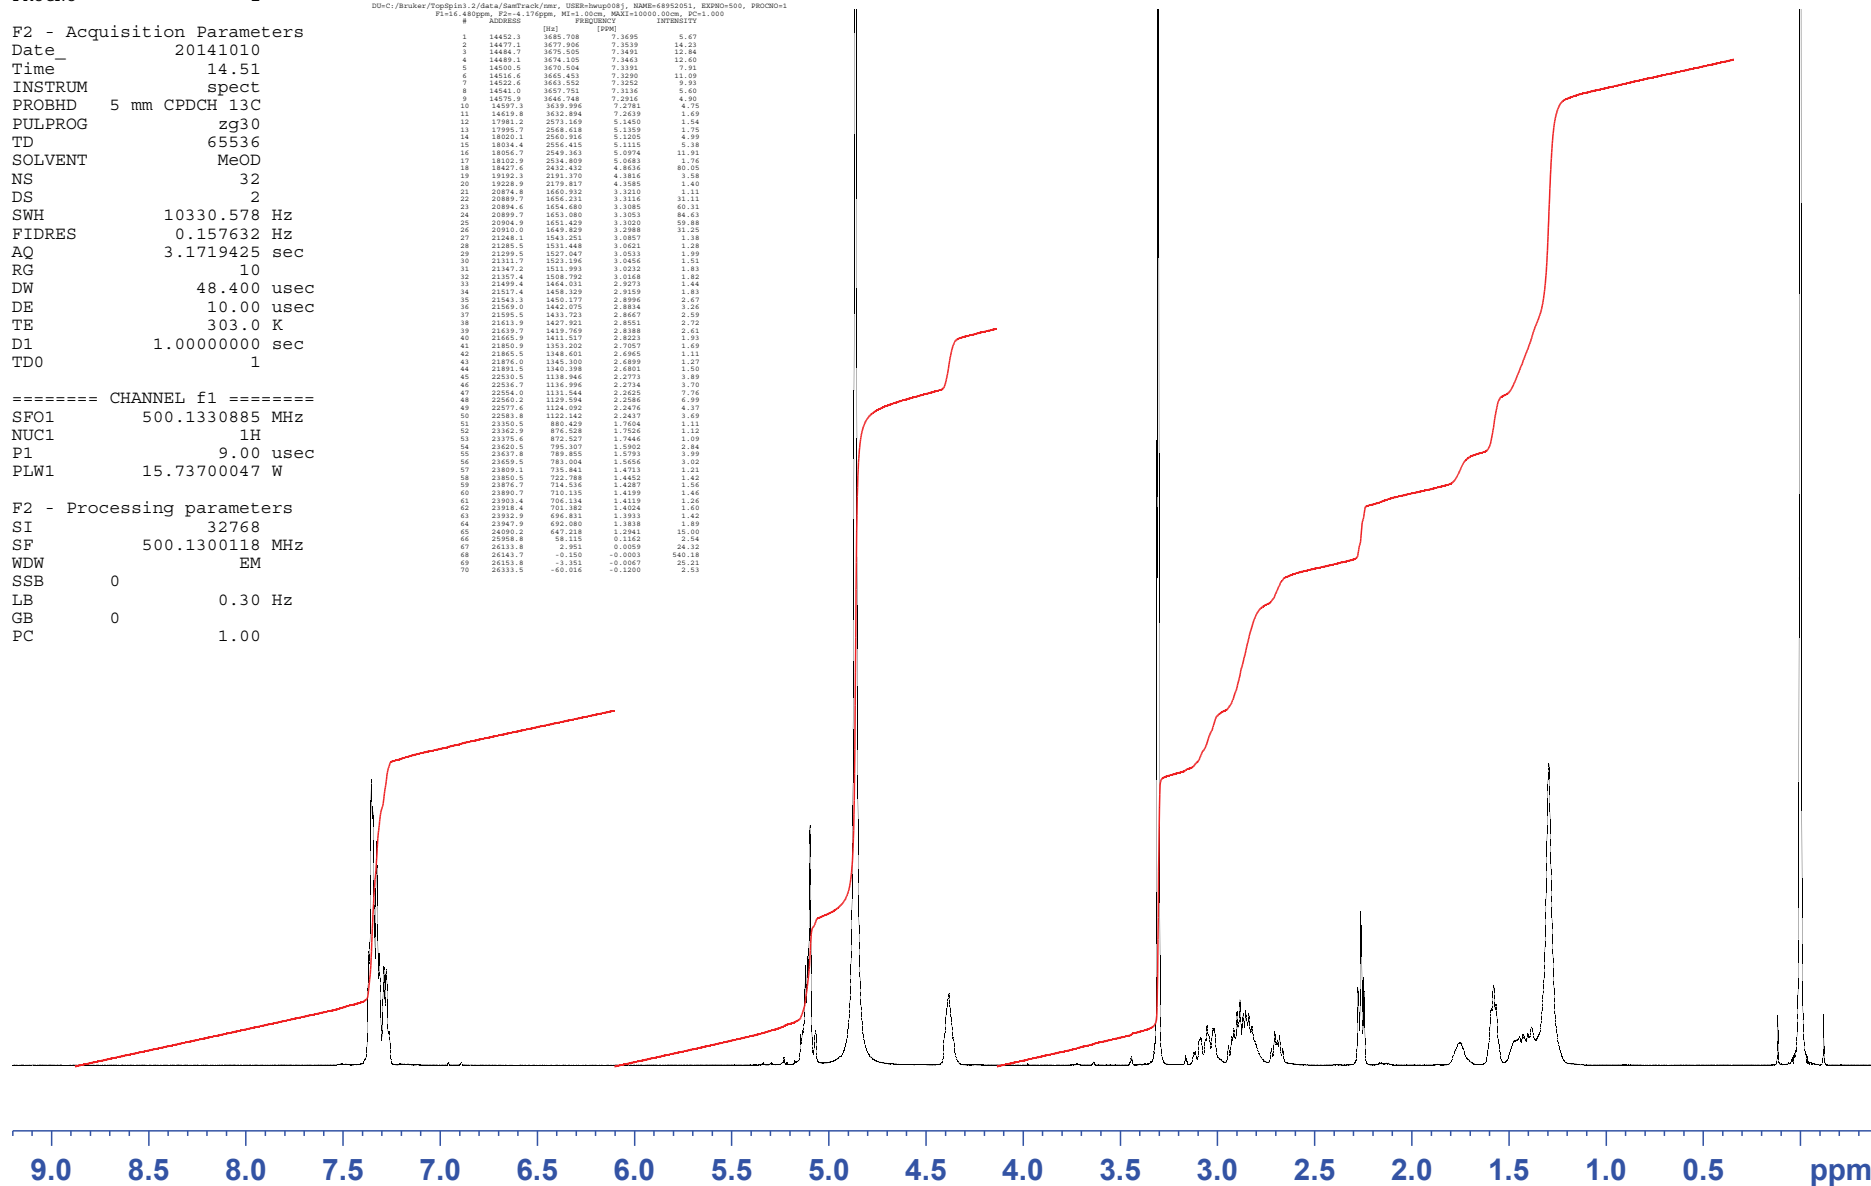

Current Data Parameters  
NAME 68952051  
EXPNO 501  
PROCNO 1

F2 - Acquisition Parameters  
Date\_ 20141010  
Time 15.03  
INSTRUM spect  
PROBHD 5 mm CPDCH 13C  
PULPROG zgpg  
TD 65536  
SOLVENT MeOD  
NS 128  
DS 4  
SWH 30864.197 Hz  
FIDRES 0.470950 Hz  
AQ 1.0616832 sec  
RG 456  
DW 16.200 usec  
DE 18.00 usec  
TE 303.0 K  
D1 4.0000000 sec  
D11 0.0300000 sec  
TDO 1

==== CHANNEL f1 =====  
SFO1 125.7703643 MHz  
NUC1 13C  
P1 9.70 usec  
PLW1 34.40000153 W

==== CHANNEL f2 =====  
SFO2 500.1320005 MHz  
NUC2 1H  
CPDPRG[2] waltz16  
PCPD2 80.00 usec  
PLW2 15.73700047 W  
PLW12 0.19916999 W  
PLW13 0.12747000 W

F2 - Processing parameters  
SI 65536  
SF 125.7576077 MHz  
WDW EM  
SSB 0  
LB 1.00 Hz  
GB 0  
PC 1.40

### compound 3e

DU=C:\Bruker\TopSpin\2\data\SanTrack\mr\_UHSR-huop0081\_NAME=68952051\_EXPNO=501\_PROCNO=1  
P1=224.151ppm, F2=-21.275ppm, MI=0.00cm, MAXI=10000.00cm, PC=1.400

| [Hz] | ADDSHIFT | PPM       | FREQUENCY | INTENSITY |
|------|----------|-----------|-----------|-----------|
| 1    | 12382.8  | 22386.986 | 177.7784  | 1.84      |
| 2    | 13378.3  | 21886.137 | 174.0502  | 2.36      |
| 3    | 13401.1  | 21877.422 | 173.9650  | 1.27      |
| 4    | 17510.1  | 15932.870 | 138.5003  | 1.06      |
| 5    | 17545.1  | 15925.777 | 138.4459  | 1.48      |
| 6    | 22848.9  | 17386.884 | 138.2094  | 1.72      |
| 7    | 25270.5  | 16287.509 | 129.5151  | 15.00     |
| 8    | 25289.4  | 16226.793 | 129.0232  | 3.38      |
| 9    | 25435.8  | 16209.650 | 128.8963  | 7.88      |
| 10   | 25442.3  | 16206.597 | 128.8717  | 6.97      |
| 11   | 25450.0  | 16202.562 | 128.8428  | 7.37      |
| 12   | 41656.4  | 8570.595  | 68.1517   | 0.58      |
| 13   | 41755.1  | 8524.090  | 67.7819   | 4.44      |
| 14   | 41760.7  | 8521.474  | 67.7611   | 3.99      |
| 15   | 44873.9  | 7053.304  | 56.1204   | 1.41      |
| 16   | 44932.1  | 6999.606  | 55.6395   | 1.56      |
| 17   | 45020.8  | 6986.124  | 55.5523   | 3.31      |
| 18   | 46593.6  | 6245.399  | 49.6422   | 2.00      |
| 19   | 46624.3  | 6230.950  | 49.5473   | 88.42     |
| 20   | 46639.2  | 6223.933  | 49.4915   | 4.52      |
| 21   | 46659.7  | 6209.584  | 49.3774   | 179.37    |
| 22   | 46684.7  | 6202.516  | 49.3212   | 7.73      |
| 23   | 46690.4  | 6199.812  | 49.2997   | 2.70      |
| 24   | 46692.5  | 6198.819  | 49.2918   | 2.55      |
| 25   | 46694.6  | 6197.825  | 49.2839   | 2.85      |
| 26   | 46696.6  | 6196.835  | 49.2765   | 3.21      |
| 27   | 46698.6  | 6195.839  | 49.2689   | 3.58      |
| 28   | 46700.7  | 6194.846  | 49.2610   | 6.12      |
| 29   | 46715.2  | 6188.117  | 49.2087   | 357.40    |
| 30   | 46730.2  | 6181.074  | 49.1507   | 6.90      |
| 31   | 46760.6  | 6166.738  | 49.0367   | 430.81    |
| 32   | 46773.3  | 6160.765  | 49.0002   | 6.08      |
| 33   | 46775.5  | 6159.721  | 49.9809   | 6.24      |
| 34   | 46779.3  | 6157.527  | 49.9686   | 3.81      |
| 35   | 46781.5  | 6156.529  | 49.9587   | 3.00      |
| 36   | 46783.5  | 6155.586  | 49.9512   | 3.36      |
| 37   | 46785.5  | 6154.605  | 49.9434   | 3.35      |
| 38   | 46787.5  | 6154.062  | 49.9359   | 3.60      |
| 39   | 46789.6  | 6153.093  | 49.9282   | 3.99      |
| 40   | 46791.7  | 6152.112  | 49.9204   | 4.69      |
| 41   | 46793.7  | 6151.144  | 49.9127   | 5.71      |
| 42   | 46806.2  | 6145.284  | 48.8641   | 165.11    |
| 43   | 46851.6  | 6123.905  | 48.6961   | 189.93    |
| 44   | 46897.1  | 6102.451  | 48.5255   | 62.03     |
| 45   | 47131.2  | 5992.224  | 47.6490   | 1.97      |
| 46   | 47259.8  | 5931.647  | 47.1473   | 1.95      |
| 47   | 49271.9  | 4984.051  | 39.6322   | 2.97      |
| 48   | 50342.1  | 4460.039  | 35.6244   | 2.28      |
| 49   | 50510.3  | 4400.850  | 34.9947   | 9.99      |
| 50   | 50594.2  | 4361.324  | 34.6804   | 1.64      |
| 51   | 50635.6  | 4341.819  | 34.5253   | 2.39      |
| 52   | 50648.8  | 4341.627  | 34.5200   | 1.57      |
| 53   | 50870.7  | 4231.115  | 33.6490   | 1.67      |
| 54   | 51715.6  | 3821.219  | 30.6459   | 8.16      |
| 55   | 51744.2  | 3819.724  | 30.3737   | 9.03      |
| 56   | 51773.4  | 3805.991  | 30.2645   | 9.14      |
| 57   | 52460.1  | 3482.580  | 27.6928   | 2.82      |
| 58   | 52475.4  | 3476.374  | 27.6355   | 2.75      |
| 59   | 52877.4  | 3266.034  | 26.1199   | 10.07     |
| 60   | 59802.2  | 24.799    | 0.1972    | 0.66      |
| 61   | 59835.8  | 0.483     | +0.0036   | 29.38     |
| 62   | 59910.4  | -26.132   | -0.2078   | 0.83      |

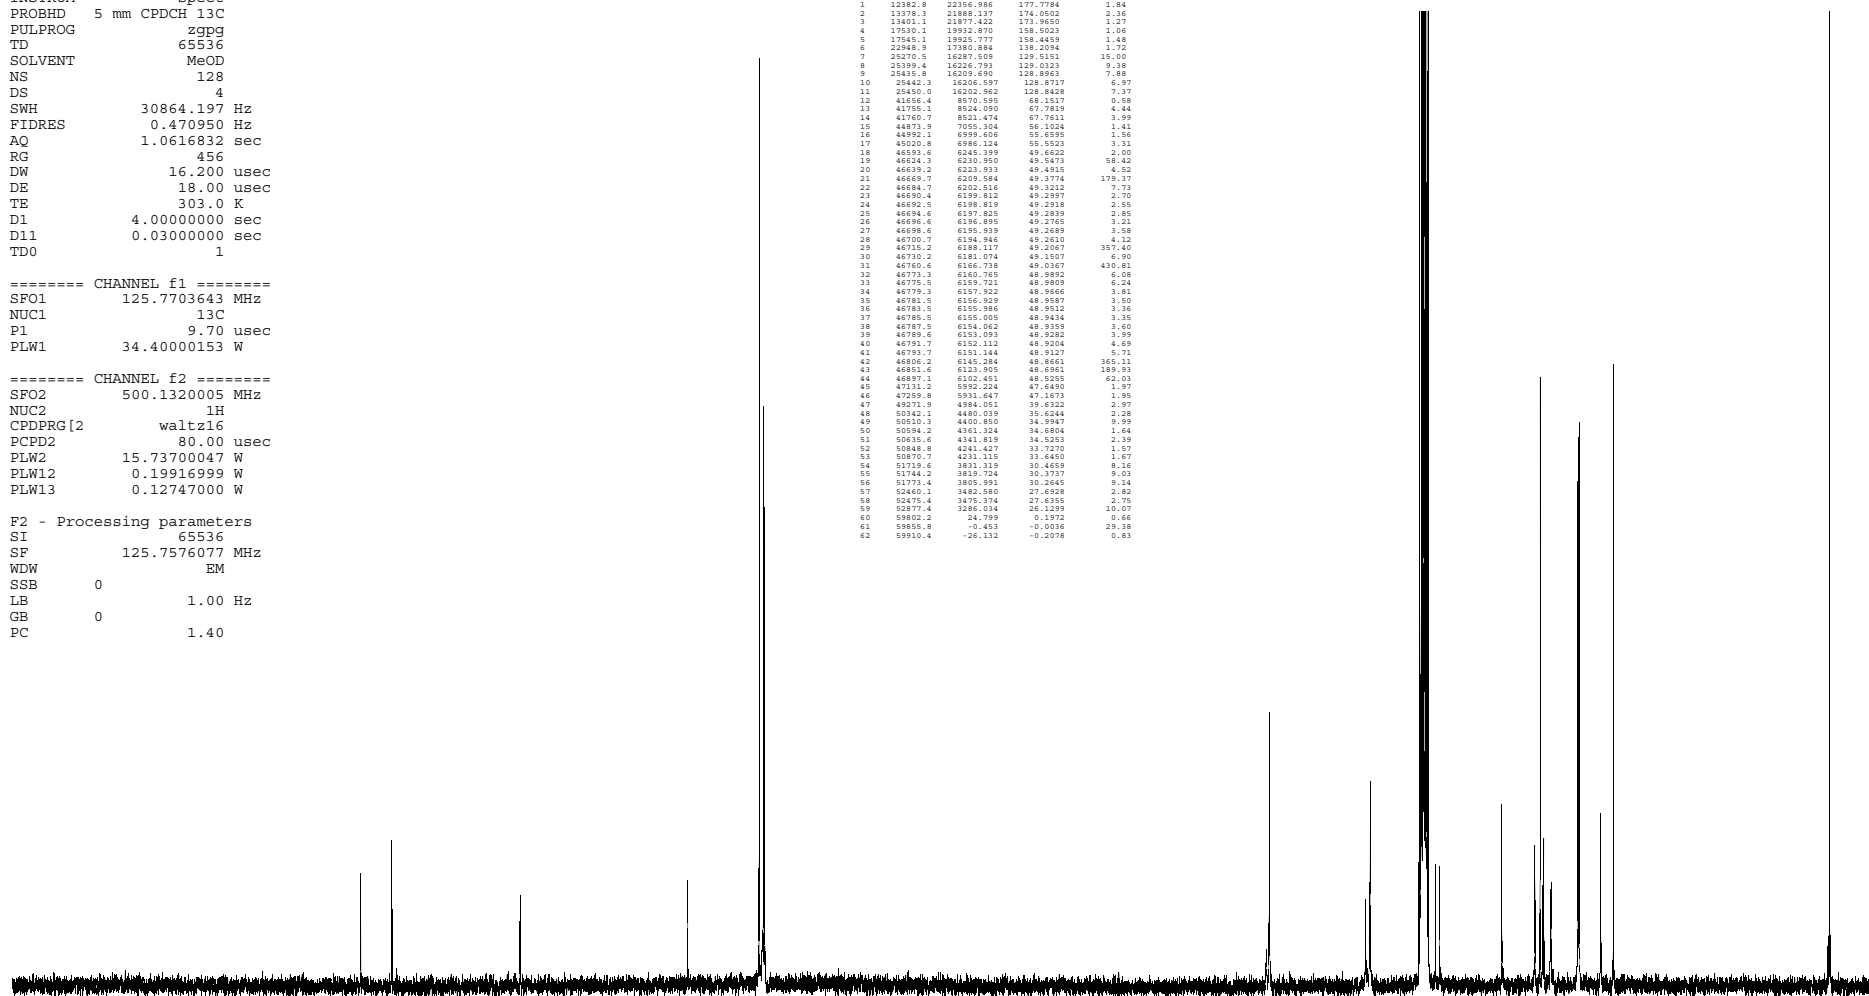

210 200 190 180 170 160 150 140 130 120 110 100 90 80 70 60 50 40 30 20 10 ppm

DU=C:/Bruker/TopSpin3.2\data/SamTrack/mr, USER=hwup008, NAME=68952051, EXPRNO=502, PROCNO=1  
F1=15.768ppm, F2=16.893ppm, MI=0.50cm, MAXI=10000.00cm, PC=1.400

| #  | ADDRESS | FREQUENCY | INTENSITY |       |
|----|---------|-----------|-----------|-------|
| 1  | 24991.8 | 16287.974 | 129.5188  | 15.00 |
| 2  | 25125.6 | 16227.210 | 129.0388  | 6.78  |
| 3  | 25163.2 | 16210.130 | 128.8998  | 7.96  |
| 4  | 25169.8 | 16207.137 | 128.8760  | 7.14  |
| 5  | 25173.6 | 16205.415 | 128.8623  | 6.03  |
| 6  | 25177.9 | 16203.453 | 128.8487  | 7.63  |
| 7  | 42087.1 | 8524.467  | 67.7849   | -4.45 |
| 8  | 42093.0 | 8521.805  | 67.7637   | -4.15 |
| 9  | 45121.0 | 7955.863  | 56.1069   | 1.24  |
| 10 | 45443.7 | 7922.184  | 55.6537   | 1.28  |
| 11 | 47471.8 | 6245.488  | 49.1549   | 2.09  |
| 12 | 47104.6 | 6245.902  | 49.4562   | 6.31  |
| 13 | 47151.8 | 6234.446  | 49.4995   | 12.63 |
| 14 | 47199.2 | 6202.906  | 49.1243   | 19.08 |
| 15 | 47248.0 | 6181.452  | 49.1337   | 13.06 |
| 16 | 47293.7 | 6159.997  | 48.9831   | 6.48  |
| 17 | 47621.4 | 5991.064  | 47.6514   | 1.59  |
| 18 | 47796.1 | 5991.848  | 47.1689   | 1.84  |
| 19 | 49882.3 | 4984.408  | 39.6322   | -2.89 |
| 20 | 50992.2 | 4480.404  | 35.6273   | -2.04 |
| 21 | 51165.3 | 4401.353  | 34.9957   | -1.95 |
| 22 | 51253.9 | 4361.538  | 34.6821   | -1.37 |
| 23 | 51295.6 | 4361.384  | 34.5282   | -1.85 |
| 24 | 51517.1 | 4242.018  | 33.7317   | -1.62 |
| 25 | 51545.4 | 4231.454  | 33.6477   | -1.66 |
| 26 | 52420.0 | 3831.998  | 30.4713   | -5.21 |
| 27 | 52445.7 | 3820.315  | 30.3784   | -5.39 |
| 28 | 52476.1 | 3806.519  | 30.2487   | -6.10 |
| 29 | 53288.3 | 3483.031  | 27.6967   | -2.00 |
| 30 | 53294.1 | 3475.928  | 27.6399   | -1.99 |
| 31 | 53621.1 | 3286.049  | 26.1340   | -8.47 |
| 32 | 59137.2 | 781.495   | 6.2143    | -0.65 |
| 33 | 60811.1 | 261.123   | 0.0764    | -0.84 |
| 34 | 60802.1 | 25.428    | 0.2022    | 1.19  |
| 35 | 60858.0 | -0.063    | 0.0005    | 45.67 |
| 36 | 60914.4 | -26.554   | -0.2032   | 1.24  |
| 37 | 61432.7 | -246.960  | -2.0751   | -0.56 |
| 38 | 62578.6 | -781.357  | -6.2132   | -0.66 |

H, CH3-Signals positive, CH2-Signals negative

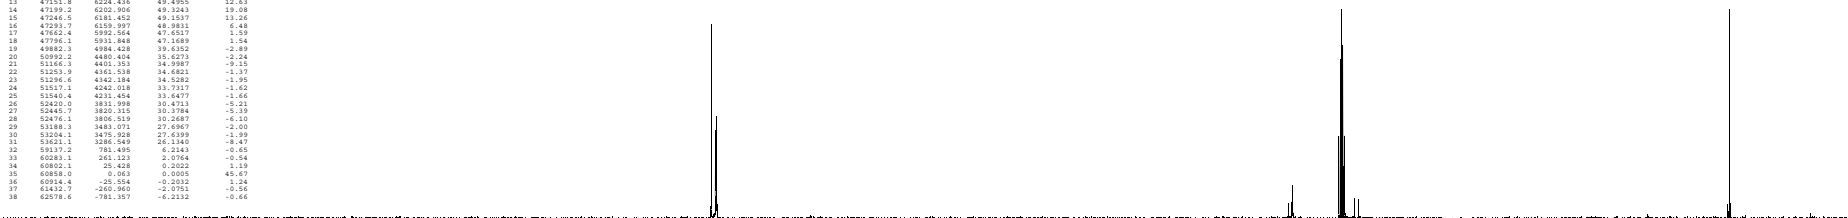

CH-Signals

DU=C:/Bruker/TopSpin3.2\data/SamTrack/mr, USER=hwup008, NAME=68952051, EXPRNO=503, PROCNO=1  
F1=15.768ppm, F2=16.893ppm, MI=0.50cm, MAXI=10000.00cm, PC=1.400

| #  | ADDRESS | FREQUENCY | INTENSITY |       |
|----|---------|-----------|-----------|-------|
| 1  | 24992.9 | 16287.497 | 129.5150  | 15.00 |
| 2  | 25106.1 | 16240.602 | 129.1421  | 0.54  |
| 3  | 25126.6 | 16226.768 | 129.0321  | 6.71  |
| 4  | 25164.3 | 16209.640 | 128.8959  | 8.37  |
| 5  | 25170.9 | 16206.660 | 128.8722  | 7.21  |
| 6  | 25174.7 | 16204.937 | 128.8585  | 6.02  |
| 7  | 25179.0 | 16202.962 | 128.8448  | 7.88  |
| 8  | 45121.8 | 7955.517  | 56.1041   | 1.24  |
| 9  | 45444.8 | 7923.643  | 55.6508   | 1.37  |
| 10 | 47475.0 | 6245.948  | 49.1529   | 2.19  |
| 11 | 47150.5 | 6245.970  | 49.4588   | 6.47  |
| 12 | 47150.5 | 6233.970  | 49.4388   | 12.37 |
| 13 | 47202.0 | 6202.441  | 49.2006   | 19.22 |
| 14 | 47232.0 | 6180.941  | 49.2001   | 0.62  |
| 15 | 47247.5 | 6180.986  | 49.1500   | 13.15 |
| 16 | 47279.4 | 6159.532  | 49.0349   | 0.51  |
| 17 | 47294.7 | 6159.532  | 48.9794   | 6.37  |
| 18 | 47651.4 | 5991.126  | 47.6483   | 1.61  |
| 19 | 47796.7 | 5991.171  | 47.1467   | 1.61  |
| 20 | 51167.1 | 4400.976  | 34.9957   | 0.60  |
| 21 | 52421.1 | 3831.507  | 30.4474   | 0.79  |
| 22 | 52448.8 | 3819.824  | 30.3745   | 0.76  |
| 23 | 52477.2 | 3806.041  | 30.2449   | 0.82  |
| 24 | 53622.0 | 3286.189  | 26.1305   | 0.87  |
| 25 | 60858.9 | -0.377    | -0.0030   | 2.42  |

Gcompound 3e

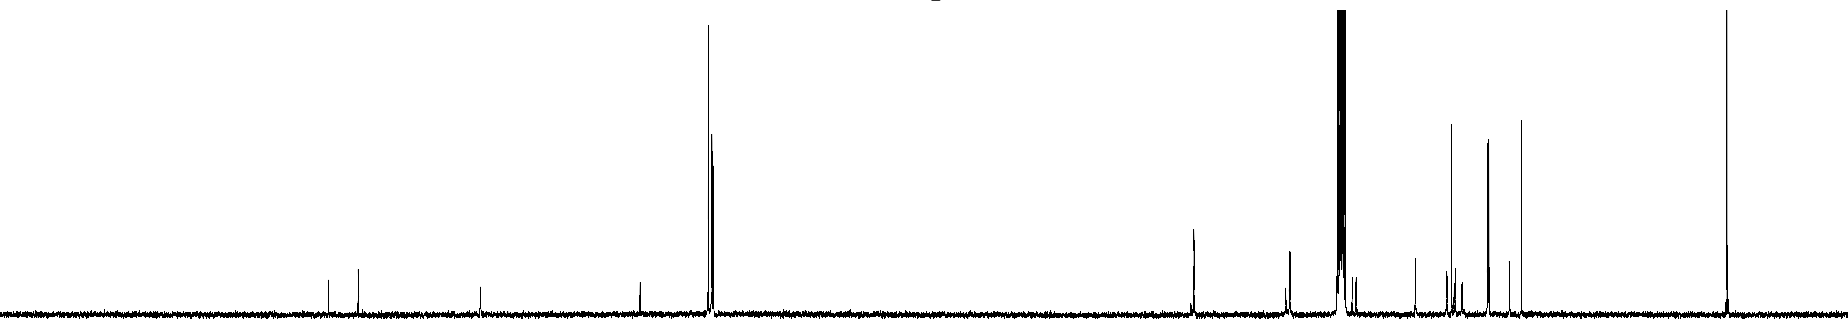

210 200 190 180 170 160 150 140 130 120 110 100 90 80 70 60 50 40 30 20 10 0 ppm

compound 3e

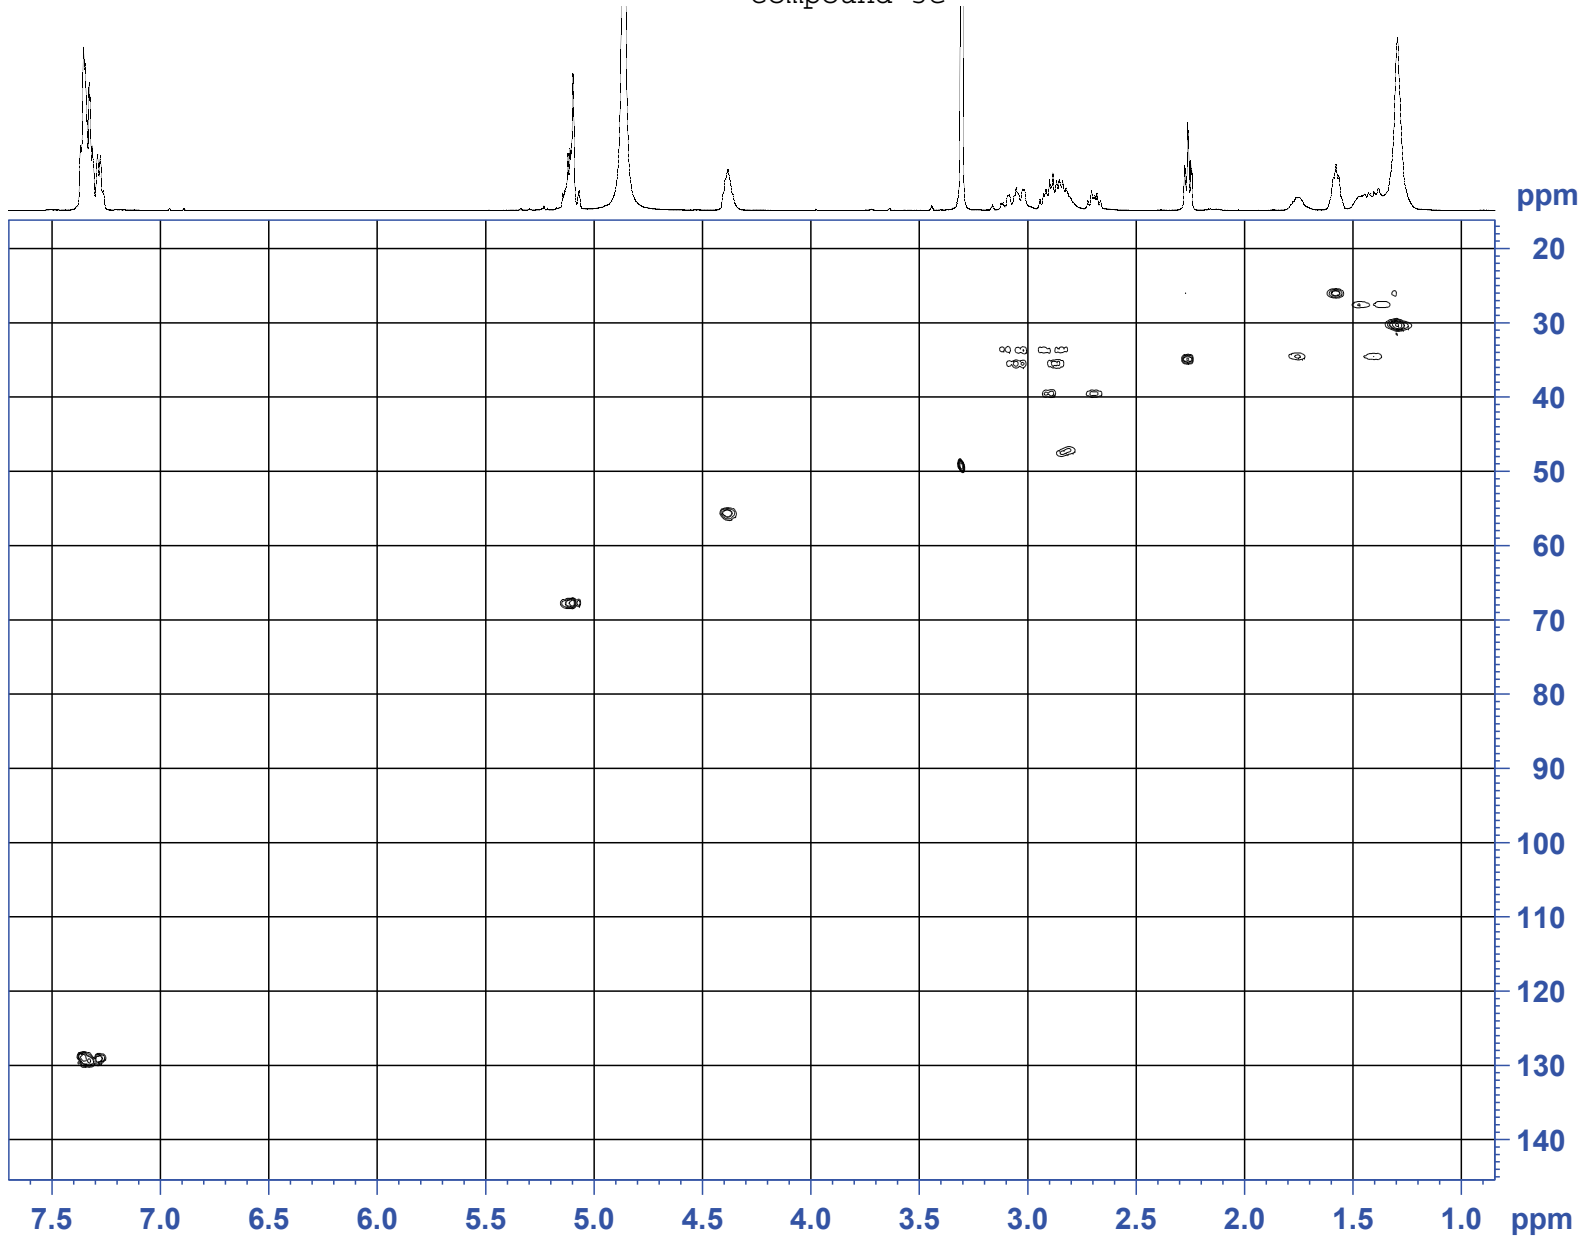

```
Current Data Parameters
NAME      68952051
EXPNO     504
PROCNO    1

F2 - Acquisition Parameters
Date_     20141010
Time      15.28
INSTRUM   spect
PROBHD    5 mm CPDCH 13C
PULPROG   hsqcetgpsi2p2.2
TD         2048
SOLVENT   MeOD
NS         2
DS         16
SWH        4672.897 Hz
FIDRES     2.281688 Hz
AQ         0.2191360 sec
RG         2050
DW         107.000 usec
DE         10.00 usec
TE         303.0 K
CNST2     145.0000000
CNST17    -0.5000000
D0         0.00000300 sec
D1         1.40865898 sec
D4         0.00172414 sec
D11        0.03000000 sec
D16        0.00020000 sec
D24        0.00110000 sec
IN0        0.00002090 sec

===== CHANNEL f1 =====
SF01      500.1317401 MHz
NUC1      1H
P1         9.00 usec
P2        18.00 usec
PLW1      P2# 0 usec
          15.73700047 W

===== CHANNEL f2 =====
SF02      125.7678496 MHz
NUC2      13C
CPDPRG[2] garp
P3         9.70 usec
P14        500.00 usec
P24        2000.00 usec
PCPD2      70.00 usec
PLW0       0 W
PLW2      34.40000153 W
PLW12     0.66055000 W
SPNAM[3]  Crp60,0.5,20.1
SPOAL3    0.500
SPOFFS3   0 Hz
SPW3      4.94530010 W
SPNAM[7]  Crp60comp.4
SPOAL7    0.500
SPOFFS7   0 Hz
SPW7      4.94530010 W

===== GRADIENT CHANNEL =====
GPNAM[1]  SMSQ10.100
GPNAM[2]  SMSQ10.100
GPNAM[3]  SMSQ10.100
GPNAM[4]  SMSQ10.100
GPZ1      80.00 %
GPZ2      20.10 %
GPZ3      11.00 %
GPZ4      -5.00 %
P16       1000.00 usec
P19       600.00 usec

F1 - Acquisition parameters
TD         256
SF01      125.7678 MHz
FIDRES     91.450958 Hz
SW         130.219 ppm
PhMODE     Echo-Antiecho

F2 - Processing parameters
SI         2048
SF         500.1300118 MHz
WDW        QSINE
SSB         2
LB         0 Hz
GB         0
PC         1.40

F1 - Processing parameters
SI         1024
NC2        echo-antiecho
SF         125.7576077 MHz
WDW        QSINE
SSB         2
LB         0 Hz
GB         0c ccc
```

compound 3e

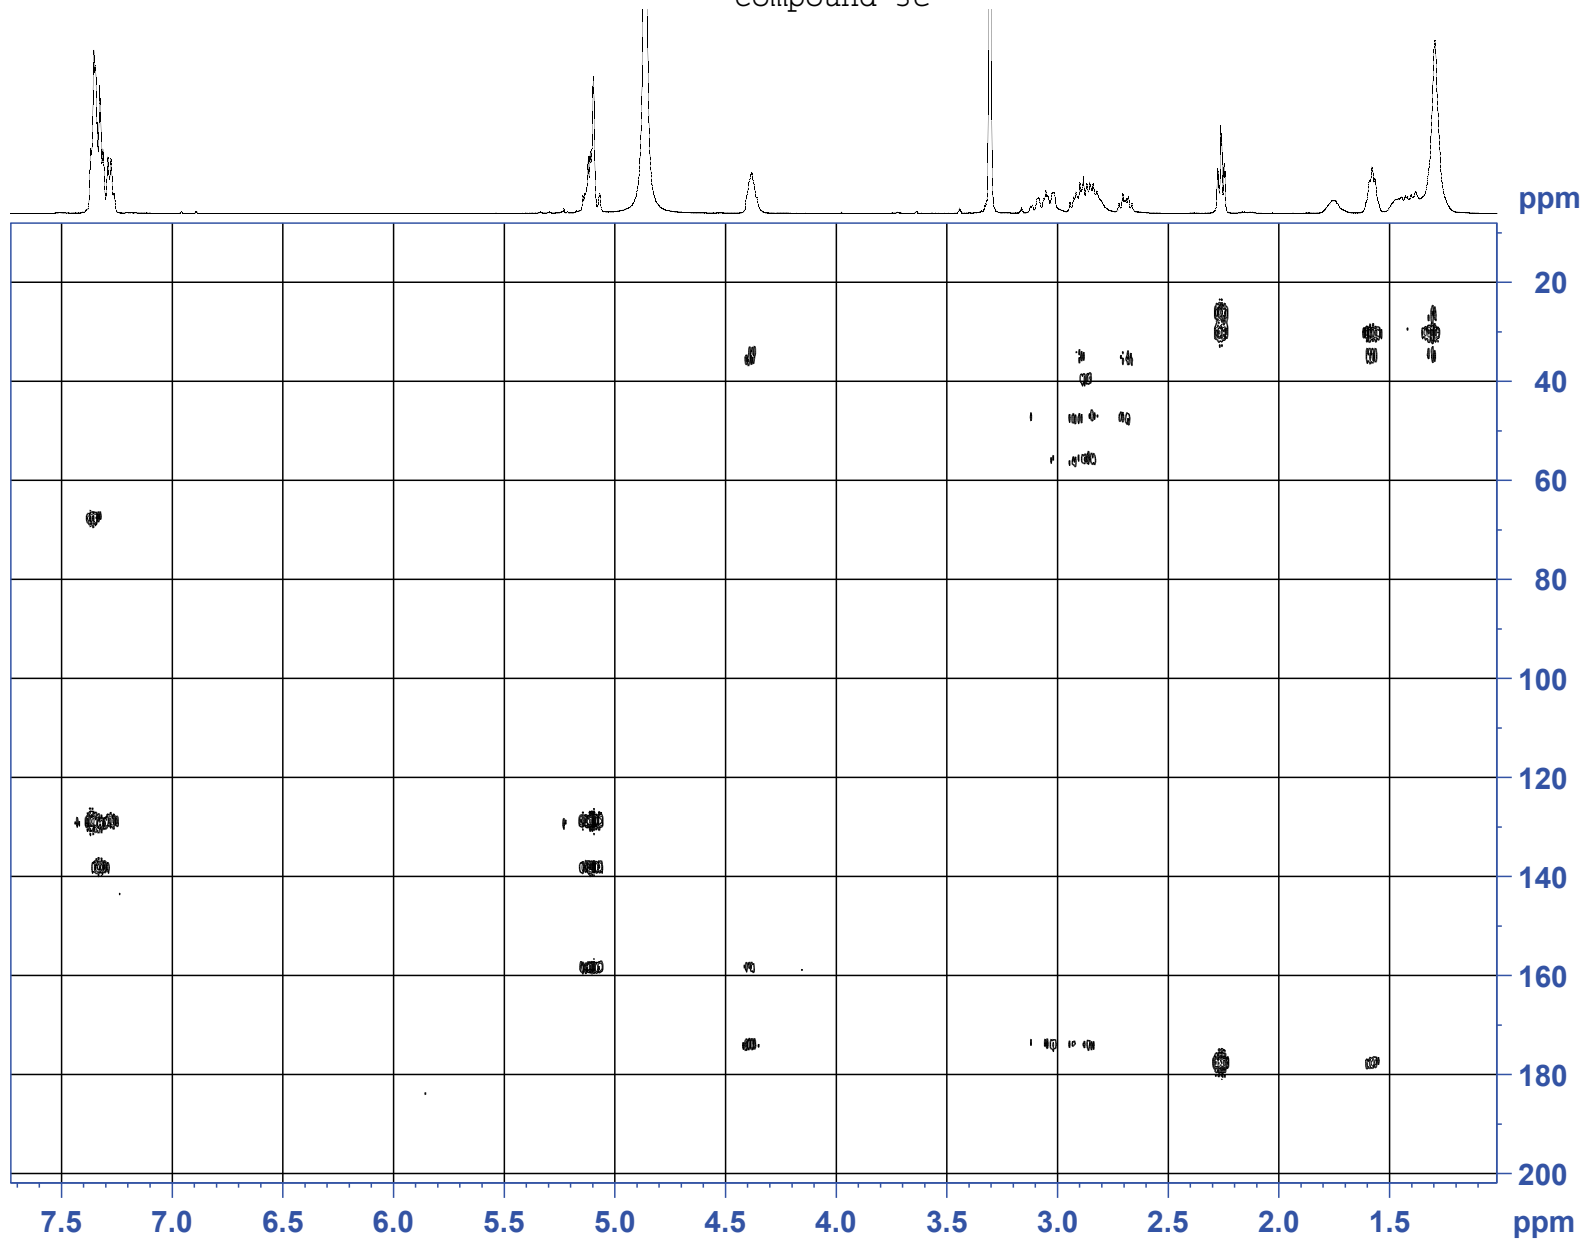

```

Current Data Parameters
NAME      68952051
EXPNO    505
PROCNO   1

F2 - Acquisition Parameters
Date_    20141010
Time     15.43
INSTRUM  spect
PROBHD   5 mm CPDCH 13C
PULPROG  hmbcetgp12nd
TD        2048
SOLVENT  MeOD
NS        2
DS        16
SWH       4672.897 Hz
FIDRES    2.281688 Hz
AQ        0.2191360 sec
RG        2050
DW        107.000 usec
DE        10.00 usec
TE        303.0 K

===== CHANNEL f1 =====
SFO1     500.1317401 MHz
NUC1     1H
P1        9.00 usec
P2        18.00 usec
PLW1     15.73700047 W

===== CHANNEL f2 =====
SFO2     125.7703443 MHz
NUC2     13C
P3        9.70 usec
P24       2000.00 usec
PLW2     34.40000153 W
SFOAL7   Crp60comp.4
SPOAL7   0.500
SPOFFS7  0 Hz
SPW7     4.94530010 W

===== GRADIENT CHANNEL =====
GPNAM[1] SMSQ10.100
GPNAM[3] SMSQ10.100
GPNAM[4] SMSQ10.100
GPNAM[5] SMSQ10.100
GPZ1     80.00 %
GPZ3     15.00 %
GPZ4     -10.00 %
GPZ5     -5.00 %
P16      1000.00 usec

F1 - Acquisition parameters
TD        256
SFO1     125.7703 MHz
FIDRES    109.113129 Hz
SW        222.095 ppm
PnMODE    Echo-Antiecho

F2 - Processing parameters
SI        2048
SF        500.1300118 MHz
WDW       SINE
SSB       0 Hz
LB        0 Hz
GB        0
PC        1.40

F1 - Processing parameters
SI        1024
MC2       echo-antiecho
SF        125.7576077 MHz
WDW       SINE
SSB       0 Hz
LB        0 Hz
GB        0
    
```

compound 3e

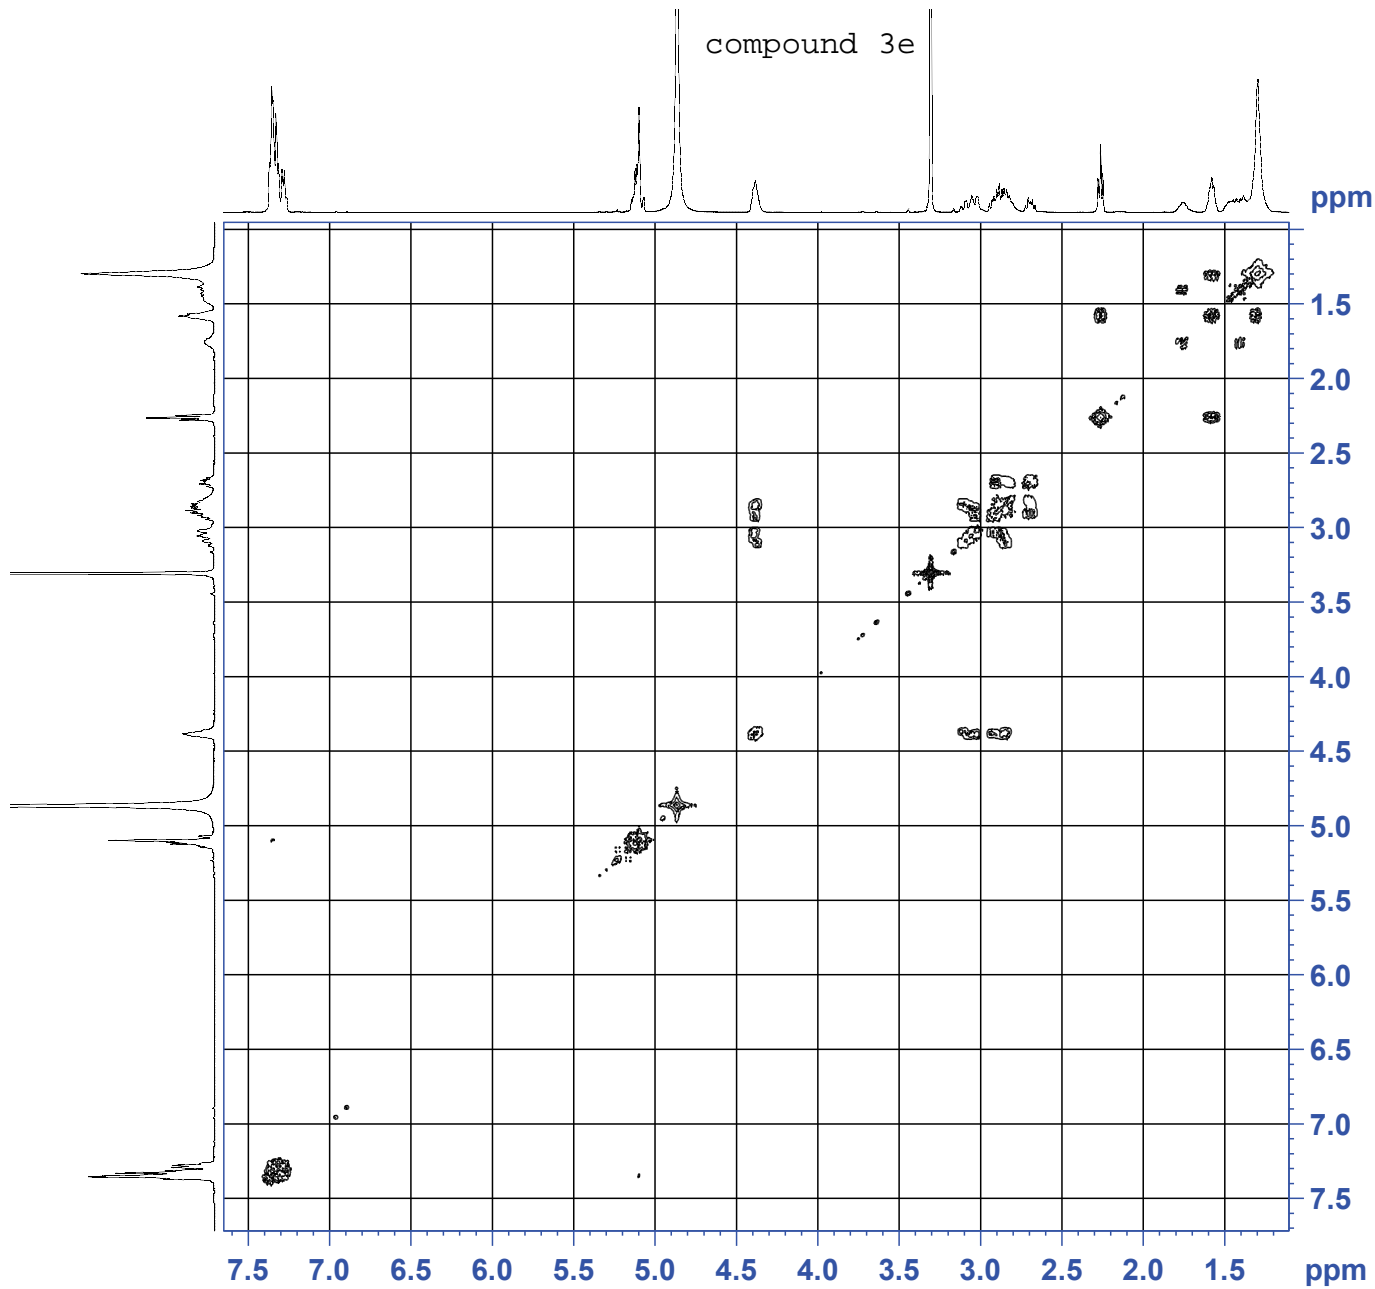

```
Current Data Parameters
NAME      68952051
EXPNO    506
PROCNO   1

F2 - Acquisition Parameters
Date_    20141010
Time     15.58
INSTRUM spect
PROBHD   5 mm CPDCH 13C
PULPROG cosygpppgf
TD       2048
SOLVENT MeOD
NS       1
DS       16
SWH      4672.897 Hz
FIDRES   2.281688 Hz
AQ       0.2191360 sec
RG       25.4
DW       107.000 usec
DE       10.00 usec
TE       303.0 K
D0       0.00000300 sec
D1       1.39555001 sec
D11      0.03000000 sec
D12      0.00002000 sec
D13      0.00000400 sec
D16      0.00020000 sec
INO      0.00021400 sec

===== CHANNEL f1 =====
SFO1    500.1317401 MHz
        NUC1      1H
P0       9.00 usec
P1       9.00 usec
P17      2500.00 usec
PLW1     15.73700047 W
PLW10    1.88559997 W

===== GRADIENT CHANNEL =====
GPNAM[1] SMSQ10.100
GPZ1     10.00 %
P16      1000.00 usec

F1 - Acquisition parameters
TD       512
SFO1    500.1317 MHz
FIDRES   9.126752 Hz
SW       9.343 ppm
        FnMODE    QF

F2 - Processing parameters
SI       2048
SF       500.1300118 MHz
WDW      SINE
        SSB       0
        LB       0 Hz
        GB       0
        PC       1.40

F1 - Processing parameters
SI       2048
MC2     QF
SF       500.1300118 MHz
WDW      SINE
        SSB       0
        LB       0 Hz
        GB       0
```
